# Supplementary material for: Dupilumab Alters Both the Bacterial and Fungal Skin Microbiomes of Patients with Atopic Dermatitis
Source: MDPI journal article supplement (doi:10.3390/microorganisms12010224), 2024-01-22
Supplement: s1 [file s1]

|                                                                                           |  |  |  |  |  |  |  |  |  |  |  |  |  |  |  |  |  |
|-------------------------------------------------------------------------------------------|--|--|--|--|--|--|--|--|--|--|--|--|--|--|--|--|--|
| Table S2 Relative abundance (%) of bacterial microbiome of subject involved in this study |  |  |  |  |  |  |  |  |  |  |  |  |  |  |  |  |  |
|-------------------------------------------------------------------------------------------|--|--|--|--|--|--|--|--|--|--|--|--|--|--|--|--|--|

| Taxa                 | Subject 01 |        |        |        | Subject 02 |        |        |        | Subject 03 |        |        |        | Subject 04 |        |        |        | Subject 05 |        |        |        |
|----------------------|------------|--------|--------|--------|------------|--------|--------|--------|------------|--------|--------|--------|------------|--------|--------|--------|------------|--------|--------|--------|
|                      | Baseline   | Week 2 | Week 4 | Week 8 | Baseline   | Week 2 | Week 4 | Week 8 | Baseline   | Week 2 | Week 4 | Week 8 | Baseline   | Week 2 | Week 4 | Week 8 | Baseline   | Week 2 | Week 4 | Week 8 |
| Cuticubacter         | 35.1       | 33.6   | 33.9   | 35.3   | 26.1       | 6.2    | 6.9    | 8.2    | 61.3       | 61.8   | 66.4   | 67.8   | 58.9       | 91.4   | 88.3   | 25.0   | 20.6       | 45.4   | 60.7   | 65.1   |
| Staphylococcus       | 53.0       | 44.0   | 46.2   | 16.9   | 16.2       | 65.6   | 78.4   | 65.3   | 16.8       | 9.4    | 24.8   | 20.1   | 14.5       | 1.5    | 1.4    | 31.6   | 23.9       | 28.6   | 4.5    | 5.3    |
| Staphylococcus       | 27.3       | 33.3   | 33.3   | 26.1   | 3.5        | 4.3    | 5.3    | 4.1    | 1.1        | 1.0    | 0.4    | 0.2    | 0.1        | 0.2    | 0.1    | 14.1   | 12.2       | 1.7    | 1.9    | 0.9    |
| Streptococcus        | 0.7        | 0.9    | 1.3    | 0.7    | 15.0       | 1.5    | 0.4    | 2.4    | 0.3        | 90.0   | 29     | 2.8    | 2.8        | 17     | 3.2    | 15.9   | 13.1       | 5.0    | 9.3    | 4.0    |
| Streptograsella      | 6.1        | 8.0    | 4.8    | 0.0    | 0.3        | 0.0    | 0.0    | 0.0    | 0.0        | 0.0    | 0.7    | 0.8    | 0.1        | 0.7    | 0.9    | 0.0    | 0.0        | 0.0    | 0.1    | 0.0    |
| Staphylococcus       | 0.0        | 0.0    | 0.0    | 0.0    | 0.1        | 1.0    | 2.0    | 0.0    | 0.0        | 0.0    | 0.0    | 0.4    | 0.0        | 0.0    | 0.0    | 0.2    | 0.6        | 0.0    | 0.2    | 0.0    |
| Firegold             | 0.2        | 0.4    | 0.7    | 0.7    | 0.1        | 0.0    | 0.0    | 0.0    | 2.6        | 2.4    | 0.1    | 0.0    | 1.1        | 0.0    | 0.1    | 1.9    | 2.3        | 1.4    | 2.5    | 2.5    |
| Acinetobacter        | 0.0        | 0.0    | 0.0    | 0.2    | 0.0        | 0.0    | 0.0    | 0.0    | 0.1        | 0.2    | 0.4    | 0.2    | 0.0        | 0.0    | 0.0    | 0.0    | 0.0        | 0.5    | 0.1    | 0.0    |
| Demococcus           | 0.0        | 0.0    | 0.0    | 0.0    | 0.1        | 1.0    | 8.5    | 0.0    | 0.0        | 0.0    | 0.0    | 0.3    | 0.0        | 0.0    | 0.0    | 0.3    | 0.3        | 0.3    | 0.3    | 0.1    |
| Roseococcus          | 0.0        | 0.0    | 0.0    | 0.1    | 0.0        | 0.0    | 0.0    | 0.0    | 0.0        | 0.0    | 0.0    | 0.0    | 0.0        | 0.0    | 0.0    | 0.2    | 0.2        | 0.0    | 0.2    | 0.0    |
| Nisseria             | 0.0        | 1.4    | 0.8    | 0.0    | 1.5        | 0.0    | 0.2    | 0.2    | 0.0        | 0.0    | 0.5    | 0.6    | 0.9        | 0.4    | 0.2    | 0.0    | 0.6        | 0.0    | 0.6    | 0.6    |
| Rothia               | 0.0        | 0.1    | 0.1    | 0.6    | 23.3       | 0.1    | 0.2    | 0.1    | 0.7        | 0.0    | 0.1    | 0.2    | 1.6        | 0.2    | 0.1    | 0.1    | 0.7        | 0.1    | 0.7    | 0.0    |
| Flavobacter          | 0.0        | 0.4    | 0.0    | 0.0    | 0.0        | 0.0    | 0.0    | 0.0    | 0.0        | 0.1    | 0.2    | 0.2    | 0.0        | 0.1    | 0.1    | 0.1    | 1.3        | 1.2    | 1.1    | 0.8    |
| Anaerococcus         | 0.0        | 0.7    | 0.5    | 0.3    | 0.1        | 0.0    | 0.1    | 0.1    | 0.0        | 0.5    | 0.0    | 0.0    | 0.6        | 0.0    | 0.0    | 0.1    | 1.0        | 0.8    | 1.0    | 3.3    |
| Kocuria              | 0.0        | 0.1    | 0.1    | 0.1    | 0.2        | 0.0    | 0.0    | 0.0    | 0.1        | 0.1    | 0.0    | 0.1    | 0.8        | 0.0    | 0.0    | 0.0    | 0.1        | 1.0    | 0.3    | 0.3    |
| Haemophilus          | 0.0        | 0.0    | 0.0    | 0.0    | 0.3        | 0.0    | 0.3    | 0.2    | 0.0        | 0.0    | 0.1    | 0.3    | 1.3        | 0.1    | 0.1    | 2.2    | 1.7        | 0.7    | 1.7    | 0.1    |
| Paracoccus           | 0.0        | 0.0    | 0.0    | 0.0    | 0.0        | 0.3    | 0.3    | 0.3    | 0.0        | 0.0    | 0.0    | 0.0    | 0.0        | 0.0    | 0.0    | 1.1    | 1.0        | 1.5    | 1.0    | 0.0    |
| Lawsonella           | 0.0        | 0.0    | 0.0    | 0.6    | 0.5        | 0.0    | 0.0    | 0.1    | 0.7        | 1.3    | 0.1    | 0.1    | 0.5        | 0.0    | 0.0    | 0.1    | 0.2        | 1.8    | 0.3    | 1.1    |
| Bacillus             | 0.3        | 0.7    | 0.8    | 1.5    | 1.0        | 0.4    | 1.3    | 1.4    | 0.2        | 0.2    | 0.1    | 0.3    | 0.5        | 0.0    | 0.0    | 0.0    | 0.5        | 0.3    | 0.1    | 0.1    |
| Methylobacterium     | 0.0        | 0.0    | 0.0    | 2.5    | 3.2        | 0.0    | 0.0    | 0.0    | 0.0        | 0.0    | 0.0    | 0.0    | 0.0        | 0.0    | 0.0    | 0.0    | 2.1        | 0.0    | 0.0    | 1.9    |
| Veillonella          | 0.0        | 0.0    | 0.3    | 0.0    | 1.0        | 0.0    | 0.0    | 0.0    | 0.0        | 0.4    | 0.0    | 0.0    | 1.1        | 0.0    | 0.0    | 0.0    | 0.8        | 0.0    | 0.0    | 0.0    |
| Gracilicella         | 0.0        | 0.0    | 0.0    | 0.0    | 0.3        | 0.0    | 0.1    | 0.2    | 0.0        | 0.0    | 0.0    | 0.3    | 0.3        | 0.2    | 0.1    | 0.0    | 1.1        | 0.0    | 0.7    | 0.0    |
| Subdoligranulus      | 0.0        | 0.0    | 0.0    | 0.0    | 0.0        | 0.0    | 0.1    | 0.1    | 0.0        | 0.0    | 0.0    | 0.1    | 0.1        | 0.0    | 0.0    | 0.3    | 0.3        | 0.2    | 0.4    | 0.5    |
| Peptoniphilus        | 0.1        | 0.5    | 0.3    | 0.1    | 0.0        | 0.0    | 0.0    | 0.1    | 0.8        | 0.0    | 0.0    | 0.0    | 0.5        | 0.0    | 0.0    | 0.0    | 0.0        | 0.7    | 0.5    | 1.9    |
| Arachnia             | 0.0        | 0.2    | 0.2    | 0.3    | 0.0        | 0.0    | 0.1    | 0.4    | 0.6        | 0.2    | 0.3    | 0.5    | 0.4        | 0.3    | 0.0    | 0.1    | 1.2        | 0.3    | 0.4    | 0.0    |
| Eubacterium          | 0.0        | 0.0    | 0.0    | 0.0    | 0.0        | 0.0    | 0.0    | 0.0    | 0.0        | 0.0    | 0.0    | 0.0    | 0.0        | 0.0    | 0.0    | 0.0    | 0.0        | 0.0    | 0.0    | 0.0    |
| Stemmatella          | 0.0        | 0.0    | 0.1    | 0.0    | 0.0        | 0.0    | 0.0    | 0.0    | 1.4        | 0.0    | 0.0    | 0.0    | 0.0        | 0.0    | 0.0    | 0.1    | 1.2        | 1.1    | 1.5    | 2.2    |
| Morococcus           | 0.0        | 0.0    | 0.0    | 0.7    | 1.5        | 0.0    | 0.0    | 0.0    | 1.0        | 1.5    | 0.0    | 0.0    | 0.0        | 0.1    | 0.6    | 0.0    | 0.1        | 0.0    | 0.2    | 0.0    |
| Serratia             | 0.0        | 0.0    | 0.0    | 0.0    | 0.0        | 0.0    | 0.0    | 0.0    | 0.0        | 0.0    | 0.0    | 0.7    | 0.0        | 0.0    | 0.0    | 0.0    | 0.0        | 0.0    | 0.0    | 0.0    |
| Pseudomonas          | 0.0        | 0.0    | 0.0    | 0.2    | 0.0        | 0.0    | 0.0    | 0.0    | 0.0        | 0.0    | 0.0    | 0.1    | 0.0        | 0.0    | 0.0    | 0.0    | 0.1        | 0.0    | 0.1    | 0.0    |
| Gemella              | 0.0        | 0.0    | 0.0    | 0.0    | 0.7        | 0.0    | 0.0    | 0.0    | 0.0        | 0.0    | 0.1    | 1.2    | 0.1        | 0.0    | 0.0    | 0.0    | 0.2        | 0.0    | 0.9    | 0.3    |
| Porphyromonas        | 0.0        | 0.0    | 0.0    | 0.0    | 0.0        | 0.0    | 0.0    | 0.0    | 0.0        | 0.0    | 0.1    | 0.2    | 0.6        | 0.4    | 0.0    | 0.0    | 0.4        | 0.0    | 0.2    | 0.0    |
| Albidus              | 0.0        | 0.0    | 0.0    | 0.0    | 0.0        | 0.0    | 0.0    | 0.0    | 0.0        | 0.0    | 0.0    | 0.0    | 0.0        | 0.0    | 0.0    | 0.0    | 0.0        | 0.3    | 0.2    | 0.0    |
| Mycobacterium        | 0.0        | 0.1    | 0.1    | 0.3    | 0.1        | 0.0    | 0.1    | 0.0    | 0.1        | 0.1    | 0.0    | 0.1    | 0.1        | 0.0    | 0.0    | 0.1    | 1.0        | 0.4    | 0.1    | 0.2    |
| Eitencoccus          | 0.0        | 0.1    | 0.1    | 0.7    | 0.0        | 0.3    | 0.2    | 0.0    | 0.1        | 0.0    | 0.1    | 0.8    | 0.0        | 0.0    | 0.0    | 0.4    | 0.5        | 0.2    | 0.1    | 0.0    |
| Actinococcus         | 0.0        | 0.0    | 0.0    | 0.1    | 0.0        | 0.0    | 0.0    | 0.0    | 0.0        | 0.0    | 0.0    | 0.1    | 0.1        | 0.0    | 0.0    | 0.1    | 0.1        | 0.0    | 0.1    | 0.1    |
| Massilia             | 0.0        | 0.0    | 0.0    | 0.0    | 0.1        | 0.0    | 0.0    | 0.0    | 0.0        | 0.0    | 0.0    | 0.0    | 0.0        | 0.0    | 0.0    | 0.0    | 0.0        | 0.0    | 0.0    | 0.0    |
| Brevundimonas        | 0.0        | 0.0    | 0.0    | 0.0    | 0.1        | 0.0    | 0.0    | 0.3    | 0.0        | 0.0    | 0.0    | 0.0    | 0.0        | 0.0    | 0.1    | 0.5    | 0.1        | 0.2    | 0.0    | 0.0    |
| Morococcus           | 0.0        | 0.0    | 0.0    | 0.0    | 0.0        | 0.4    | 0.0    | 0.0    | 0.0        | 0.0    | 0.0    | 0.0    | 0.8        | 0.0    | 0.0    | 0.8    | 0.3        | 0.2    | 0.0    | 0.0    |
| Kingella             | 0.0        | 0.4    | 0.3    | 0.0    | 0.0        | 0.0    | 0.0    | 0.0    | 0.0        | 0.0    | 0.0    | 0.0    | 0.1        | 0.0    | 0.0    | 0.0    | 0.0        | 0.0    | 0.0    | 0.0    |
| Dermacoccus          | 0.0        | 0.0    | 0.0    | 0.0    | 0.0        | 0.0    | 0.0    | 0.0    | 0.0        | 0.0    | 0.0    | 0.0    | 0.0        | 0.0    | 0.0    | 0.0    | 0.0        | 0.0    | 0.0    | 0.0    |
| Leptothrix           | 0.0        | 0.0    | 0.2    | 0.4    | 0.0        | 0.0    | 0.0    | 0.0    | 0.0        | 0.0    | 0.0    | 0.5    | 0.0        | 0.0    | 0.0    | 0.5    | 0.0        | 0.1    | 0.0    | 0.0    |
| Fusobacterium        | 0.0        | 0.0    | 0.2    | 0.0    | 0.0        | 0.0    | 0.0    | 0.0    | 0.0        | 0.0    | 0.0    | 0.3    | 0.0        | 0.0    | 0.0    | 0.3    | 0.2        | 0.1    | 0.3    | 0.0    |
| Eikenella            | 0.4        | 0.2    | 0.0    | 0.0    | 0.0        | 0.0    | 0.0    | 0.0    | 0.0        | 0.0    | 0.0    | 0.1    | 0.0        | 0.0    | 0.0    | 0.0    | 0.0        | 0.5    | 0.0    | 0.0    |
| Mycobacterium        | 0.0        | 0.0    | 0.2    | 0.2    | 0.0        | 0.0    | 0.0    | 0.1    | 0.1        | 0.0    | 0.0    | 0.1    | 0.0        | 0.1    | 0.1    | 0.2    | 0.3        | 0.1    | 0.1    | 0.0    |
| Brucella             | 0.0        | 0.1    | 0.1    | 0.1    | 0.0        | 0.1    | 0.1    | 0.0    | 0.0        | 0.0    | 0.0    | 0.1    | 0.1        | 0.0    | 0.0    | 0.1    | 0.1        | 0.1    | 0.1    | 0.0    |
| Tessaracoccus        | 0.0        | 0.1    | 0.1    | 0.1    | 0.0        | 0.0    | 0.0    | 0.2    | 0.2        | 0.0    | 0.2    | 0.2    | 0.2        | 0.2    | 0.0    | 0.1    | 0.3        | 0.2    | 0.2    | 0.0    |
| Rhodococcus          | 0.0        | 0.0    | 0.3    | 0.2    | 0.0        | 0.0    | 0.0    | 0.3    | 0.1        | 0.0    | 0.0    | 0.1    | 0.0        | 0.0    | 0.0    | 0.0    | 0.2        | 0.2    | 0.1    | 0.0    |
| Metabacillus         | 0.0        | 0.1    | 0.0    | 0.0    | 0.0        | 0.1    | 0.0    | 0.0    | 0.0        | 0.0    | 0.0    | 0.0    | 0.0        | 0.0    | 0.0    | 0.0    | 0.2        | 0.0    | 0.0    | 0.0    |
| Pseudotubercillia    | 0.0        | 0.0    | 0.0    | 0.1    | 0.0        | 0.0    | 0.0    | 0.0    | 0.0        | 0.0    | 0.0    | 0.1    | 0.2        | 0.0    | 0.0    | 0.0    | 0.0        | 0.0    | 0.0    | 0.0    |
| Povallibacter        | 0.0        | 0.0    | 0.2    | 0.0    | 0.0        | 0.0    | 0.0    | 0.4    | 0.4        | 0.0    | 0.0    | 0.0    | 0.0        | 0.0    | 0.0    | 0.0    | 0.0        | 0.0    | 0.0    | 0.0    |
| Lorellibacter        | 0.0        | 0.0    | 0.0    | 0.1    | 0.0        | 0.0    | 0.0    | 0.1    | 0.1        | 0.0    | 0.0    | 0.0    | 0.0        | 0.3    | 0.0    | 0.0    | 0.0        | 0.0    | 0.0    | 0.0    |
| Morococcus           | 0.0        | 0.0    | 0.0    | 0.0    | 0.0        | 0.0    | 0.0    | 0.0    | 0.0        | 0.0    | 0.0    | 0.0    | 0.0        | 0.0    | 0.0    | 0.0    | 0.0        | 0.0    | 0.0    | 0.0    |
| Methylobacterium     | 0.0        | 0.0    | 0.0    | 0.0    | 0.0        | 0.0    | 0.0    | 0.0    | 0.0        | 0.0    | 0.0    | 0.0    | 0.0        | 0.0    | 0.0    | 0.0    | 0.0        | 0.0    | 0.6    | 1.0    |
| Chrysiobacterium     | 0.0        | 0.0    | 0.0    | 0.0    | 0.0        | 0.0    | 0.0    | 0.0    | 0.0        | 0.0    | 0.0    | 0.0    | 0.0        | 0.0    | 0.0    | 0.0    | 0.0        | 0.0    | 0.0    | 0.0    |
| Brucella             | 0.0        | 0.0    | 0.1    | 0.0    | 0.0        | 0.0    | 0.0    | 0.0    | 0.0        | 0.0    | 0.0    | 0.0    | 0.0        | 0.0    | 0.0    | 0.0    | 0.0        | 0.0    | 0.0    | 0.0    |
| Nocardiofilus        | 0.0        | 0.1    | 0.1    | 0.1    | 0.0        | 0.0    | 0.0    | 0.0    | 0.1        | 0.1    | 0.0    | 0.1    | 0.2        | 0.2    | 0.0    | 0.1    | 0.2        | 0.1    | 0.2    | 0.0    |
| Mammaliococcus       | 0.4        | 0.3    | 0.1    | 0.1    | 0.1        | 0.6    | 0.4    | 0.1    | 0.1        | 0.0    | 0.1    | 0.1    | 0.0        | 0.0    | 0.0    | 0.3    | 0.1        | 0.0    | 0.0    | 0.0    |
| Lactobacillus        | 0.0        | 0.3    | 0.0    | 0.0    | 0.0        | 0.0    | 0.0    | 0.0    | 0.0        | 0.0    | 0.0    | 0.0    | 0.0        | 0.0    | 0.0    | 0.3    | 0.0        | 0.1    | 0.0    | 0.0    |
| Streptobacter        | 0.0        | 0.0    | 0.2    | 0.0    | 0.0        | 0.3    | 0.0    | 0.3    | 0.0        | 0.0    | 0.0    | 0.0    | 0.0        | 0.0    | 0.0    | 0.3    | 0.0        | 0.0    | 0.0    | 0.0    |
| Rahnella             | 0.0        | 0.0    | 0.0    | 0.0    | 0.0        | 0.0    | 0.0    | 0.0    | 0.0        | 0.0    | 0.0    | 0.0    | 0.0        | 0.0    | 0.0    | 0.0    | 0.0        | 0.0    | 0.0    | 0.0    |
| Macrococcus          | 0.1        | 0.3    | 0.3    | 0.1    | 0.1        | 0.4    | 0.5    | 0.1    | 0.0        | 0.0    | 0.1    | 0.1    | 0.0        | 0.0    | 0.0    | 0.1    | 0.2        | 0.0    | 0.0    | 0.1    |
| Pseudocapnocytophaga | 0.0        | 0.1    | 0.1    | 0.0    | 0.0        | 0.2    | 0.1    | 0.2    | 0.1        | 0.0    | 0.1    | 0.1    | 0.1        | 0.1    | 0.0    | 0.1    | 0.2        | 0.0    | 0.1    | 0.0    |
| Alysiella            | 0.0        | 0.1    | 0.1    | 0.0    | 0.0        | 0.0    | 0.0    | 0.2    | 0.2        | 0.0    | 0.0    | 0.0    | 0.0        | 0.0    | 0.0    | 0.0    | 0.0        | 0.0    | 0.0    | 0.0    |
| Dialister            | 0.0        | 0.1    | 0.0    | 0.0    | 0.0        | 0.0    | 0.0    | 0.0    | 0.0        | 0.0    | 0.0    | 0.0    | 0.0        | 0.0    | 0.0    | 0.0    | 0.0        | 0.8    | 0.9    | 0.0    |
| Pyrrochrobacter      | 0.0        | 0.0    | 0.0    | 0.0    | 0.0        | 0.2    | 0.0    | 0.0    | 0.0        | 0.0    | 0.0    | 0.0    | 0.0        | 0.0    | 0.0    | 0.0    | 0.0        | 0.0    | 0.0    | 0.0    |
| Parabacter           | 0.0        | 0.0    | 0.0    | 0.0    | 0.0        | 0.0    | 0.0    | 0.0    | 0.0        | 0.0    | 0.0    | 0.0    | 0.0        | 0.0    | 0.0    | 0.0    | 0.0        | 0.0    | 0.0    | 0.0    |
| Cupriavidus          | 0.0        | 0.0    | 0.2    | 0.1    | 0.0        | 0.0    | 0.0    | 0.1    | 0.1        | 0.0    | 0.0    | 0.0    | 0.0        | 0.0    | 0.0    | 0.0    | 0.0        | 0.0    | 0.0    | 0.0    |
| Simonsiella          | 0.0        | 0.3    | 0.2    | 0.0    | 0.0        | 0.0    | 0.0    | 0.0    | 0.0        | 0.0    | 0.0    | 0.0    | 0.0        | 0.0    | 0.0    | 0.0    | 0.0        | 0.0    | 0.0    | 0.0    |
| Lactobacillus        | 0.0        | 0.0    | 0.0    | 0.0    | 0.0        | 0.0    | 0.0    | 0.0    | 0.0        | 0.0    | 0.0    | 0.0    | 0.0        | 0.0    | 0.0    | 0.0    | 0.0        | 0.0    | 0.0    | 0.0    |
| Erwinia              | 0.0        | 0.3    | 0.0    |        |            |        |        |        |            |        |        |        |            |        |        |        |            |        |        |        |

| Taxa              | Subject 06 |        |        |        |         | Subject 07 |        |        |        |         | Subject 08 |        |        |        |         | Subject 09 |        |        |        |         | Subject 10 |        |        |        |         |     |
|-------------------|------------|--------|--------|--------|---------|------------|--------|--------|--------|---------|------------|--------|--------|--------|---------|------------|--------|--------|--------|---------|------------|--------|--------|--------|---------|-----|
|                   | Baseline   | Week 2 | Week 4 | Week 8 | Week 12 | Baseline   | Week 2 | Week 4 | Week 8 | Week 12 | Baseline   | Week 2 | Week 4 | Week 8 | Week 12 | Baseline   | Week 2 | Week 4 | Week 8 | Week 12 | Baseline   | Week 2 | Week 4 | Week 8 | Week 12 |     |
| Colibacterium     | 41.6       | 42.8   | 43.4   | 46.5   | 69.9    | 42.9       | 45.2   | 25.4   | 41.6   | 37.6    | 26.3       | 20.9   | 22.5   | 31.2   | 37.5    | 26.3       | 27.5   | 24.9   | 38.2   | 50.2    | 18.1       | 16.2   | 18.5   | 32.6   | 41.8    |     |
| Coliformococcus   | 24.1       | 3.9    | 18.9   | 3.2    | 3.9     | 28.8       | 28.8   | 28.8   | 28.8   | 28.8    | 28.8       | 29.7   | 6.2    | 8.5    | 4.9     | 35.7       | 20.2   | 16.0   | 28.2   | 29.1    | 29.1       | 24.7   | 24.7   | 24.7   | 24.7    |     |
| Corynebacterium   | 5.4        | 3.9    | 3.8    | 1.0    | 1.5     | 8.2        | 9.1    | 5.7    | 18.2   | 15.4    | 1.8        | 1.8    | 3.1    | 4.4    | 7.8     | 16.0       | 15.7   | 20.8   | 6.3    | 3.1     | 7.8        | 7.9    | 13.0   | 19.8   | 19.0    |     |
| Moraxella         | 6.3        | 6.6    | 4.4    | 0.0    | 1.9     | 3.8        | 4.0    | 2.1    | 1.0    | 0.9     | 1.0        | 1.0    | 0.1    | 4.7    | 3.7     | 2.6        | 2.6    | 3.2    | 5.9    | 0.1     | 9.5        | 9.5    | 6.0    | 0.7    | 0.8     |     |
| Streptococcus     | 0.2        | 1.0    | 0.2    | 1.9    | 0.1     | 0.1        | 0.1    | 0.1    | 12.1   | 12.1    | 13.1       | 13.1   | 16.1   | 15.8   | 15.8    | 0.1        | 0.1    | 0.1    | 10.1   | 10.1    | 11.1       | 11.1   | 11.1   | 11.1   | 23.8    |     |
| Streptococcus     | 4.2        | 4.4    | 4.4    | 0.5    | 0.3     | 0.0        | 0.0    | 0.4    | 3.0    | 6.2     | 11.3       | 15.1   | 12.6   | 4.5    | 8.2     | 4.8        | 6.6    | 9.9    | 11.5   | 6.1     | 1.9        | 0.5    | 2.7    | 3.8    | 0.0     |     |
| Finetella         | 3.9        | 2.5    | 0.9    | 0.3    | 0.1     | 0.1        | 0.0    | 0.2    | 0.1    | 0.4     | 0.1        | 0.0    | 0.1    | 0.2    | 0.3     | 0.1        | 0.6    | 0.1    | 0.3    | 0.4     | 0.3        | 0.3    | 5.2    | 0.2    | 0.5     |     |
| Acinetobacter     | 0.6        | 0.1    | 0.3    | 0.0    | 0.2     | 0.0        | 0.0    | 0.0    | 0.0    | 0.0     | 0.2        | 1.0    | 0.2    | 0.8    | 0.9     | 0.4        | 0.2    | 0.7    | 1.4    | 1.1     | 0.8        | 0.2    | 0.8    | 0.9    | 0.4     |     |
| Acinetobacter     | 0.1        | 0.5    | 0.1    | 0.3    | 0.3     | 0.0        | 0.1    | 0.0    | 0.1    | 0.0     | 0.1        | 0.1    | 0.1    | 0.1    | 0.1     | 0.1        | 0.1    | 0.2    | 0.2    | 0.2     | 0.1        | 1.1    | 0.2    | 0.1    | 0.1     |     |
| Roseomonas        | 0.0        | 0.0    | 0.1    | 0.1    | 0.4     | 0.0        | 0.0    | 0.0    | 0.0    | 0.0     | 0.0        | 1.6    | 1.5    | 0.9    | 2.0     | 0.3        | 0.0    | 0.0    | 0.0    | 0.0     | 0.0        | 0.0    | 0.0    | 0.0    | 0.0     |     |
| Neisseria         | 0.0        | 0.1    | 0.1    | 1.8    | 2.0     | 0.0        | 0.2    | 2.8    | 0.0    | 0.1     | 1.6        | 3.9    | 2.0    | 5.8    | 4.1     | 0.1        | 0.1    | 0.2    | 0.1    | 1.9     | 2.2        | 0.3    | 2.8    | 0.6    | 0.0     |     |
| Neisseria         | 0.1        | 0.9    | 0.1    | 0.1    | 0.1     | 0.1        | 0.1    | 0.1    | 0.1    | 0.1     | 0.1        | 0.1    | 0.1    | 0.1    | 0.1     | 0.1        | 0.1    | 0.1    | 0.1    | 0.1     | 0.1        | 0.1    | 0.1    | 0.1    | 0.1     |     |
| Pseudell          | 1.4        | 1.7    | 0.3    | 0.3    | 0.1     | 0.1        | 0.3    | 1.5    | 0.2    | 2.0     | 0.0        | 0.0    | 0.0    | 0.1    | 0.0     | 0.2        | 0.2    | 0.2    | 0.1    | 0.9     | 0.0        | 0.0    | 0.5    | 0.0    | 0.7     |     |
| Anaerococcus      | 0.9        | 0.7    | 0.1    | 0.2    | 0.2     | 0.1        | 0.0    | 0.0    | 0.0    | 0.0     | 0.0        | 0.0    | 0.2    | 0.3    | 0.2     | 0.2        | 0.4    | 0.1    | 0.7    | 0.1     | 2.0        | 3.8    | 4.8    | 0.2    | 1.0     |     |
| Kocuria           | 0.3        | 1.7    | 4.1    | 0.9    | 0.9     | 0.1        | 0.2    | 0.3    | 0.1    | 0.2     | 0.0        | 0.0    | 0.0    | 0.0    | 0.2     | 0.1        | 0.1    | 0.0    | 0.1    | 0.1     | 0.1        | 0.5    | 0.1    | 0.1    | 0.2     |     |
| Haemophilus       | 0.1        | 0.2    | 0.0    | 0.0    | 0.0     | 0.1        | 0.2    | 1.2    | 0.1    | 0.1     | 0.1        | 0.1    | 0.1    | 0.1    | 0.1     | 0.1        | 0.1    | 0.2    | 0.2    | 0.2     | 0.0        | 0.0    | 0.0    | 0.0    | 0.0     |     |
| Paracoccus        | 0.1        | 0.1    | 0.1    | 0.3    | 0.0     | 0.1        | 0.9    | 2.4    | 2.7    | 2.2     | 0.1        | 0.4    | 0.3    | 0.6    | 0.1     | 0.0        | 0.0    | 0.0    | 0.0    | 0.0     | 0.0        | 0.0    | 0.0    | 0.3    | 0.1     |     |
| Lawsonella        | 0.1        | 0.6    | 0.2    | 0.0    | 0.0     | 0.1        | 1.0    | 1.5    | 2.0    | 1.0     | 0.5        | 0.6    | 0.0    | 0.0    | 0.1     | 0.1        | 0.2    | 0.0    | 0.3    | 2.3     | 0.0        | 0.2    | 0.5    | 0.1    | 0.1     |     |
| Lawsonella        | 0.1        | 0.4    | 0.1    | 0.2    | 0.2     | 0.1        | 0.3    | 0.6    | 0.4    | 0.3     | 0.6        | 0.6    | 0.3    | 0.1    | 0.2     | 0.1        | 0.4    | 0.3    | 0.6    | 0.3     | 0.6        | 0.3    | 0.3    | 0.3    | 0.3     |     |
| Mycobacterium     | 0.0        | 0.0    | 0.2    | 0.0    | 0.0     | 0.0        | 0.1    | 0.0    | 0.0    | 0.0     | 0.5        | 0.7    | 0.5    | 0.4    | 1.8     | 1.0        | 0.0    | 0.0    | 0.1    | 0.0     | 0.0        | 0.0    | 0.0    | 0.5    | 0.8     |     |
| Mycobacterium     | 0.0        | 0.2    | 0.0    | 0.1    | 0.2     | 0.1        | 0.4    | 2.2    | 0.0    | 0.0     | 0.0        | 0.0    | 0.0    | 0.0    | 0.3     | 0.1        | 0.8    | 0.4    | 0.4    | 0.4     | 0.1        | 0.0    | 1.1    | 0.0    | 0.5     |     |
| Verrucom          | 0.0        | 0.4    | 0.0    | 0.1    | 0.1     | 0.2        | 0.5    | 0.1    | 0.2    | 0.0     | 0.2        | 0.0    | 0.0    | 0.1    | 0.1     | 0.8        | 0.4    | 1.0    | 0.0    | 0.0     | 0.0        | 0.0    | 0.0    | 0.0    | 0.0     |     |
| Sphingomonas      | 0.0        | 0.3    | 0.6    | 0.0    | 0.0     | 0.2        | 0.4    | 0.4    | 0.5    | 0.5     | 0.8        | 0.4    | 0.5    | 0.6    | 0.8     | 0.1        | 0.3    | 0.9    | 1.6    | 0.3     | 0.0        | 0.0    | 0.0    | 0.9    | 0.2     | 0.7 |
| Williams          | 0.0        | 0.1    | 0.0    | 0.0    | 0.0     | 0.0        | 0.1    | 0.5    | 0.5    | 0.4     | 0.9        | 0.8    | 0.9    | 3.9    | 0.3     | 0.0        | 0.1    | 1.1    | 0.3    | 0.2     | 0.0        | 0.0    | 0.0    | 0.0    | 0.0     |     |
| Penicillium       | 0.0        | 0.1    | 0.2    | 0.1    | 0.1     | 0.0        | 0.0    | 0.1    | 0.1    | 0.1     | 0.5        | 0.0    | 0.0    | 0.0    | 0.1     | 0.1        | 0.0    | 0.1    | 0.1    | 0.1     | 0.1        | 0.6    | 1.8    | 0.2    | 0.9     |     |
| Penicillium       | 0.6        | 0.8    | 0.4    | 0.3    | 2.3     | 0.0        | 0.4    | 0.3    | 0.0    | 0.0     | 0.2        | 0.2    | 0.2    | 0.2    | 0.2     | 0.1        | 0.1    | 0.3    | 0.1    | 0.4     | 0.3        | 0.0    | 0.4    | 0.2    | 0.4     |     |
| Escherichia       | 0.0        | 0.0    | 0.0    | 0.0    | 0.0     | 0.0        | 0.0    | 0.0    | 0.0    | 0.0     | 0.0        | 0.0    | 0.0    | 0.0    | 0.0     | 0.0        | 0.0    | 0.0    | 0.0    | 0.0     | 0.0        | 0.0    | 0.0    | 0.0    | 0.0     |     |
| Stemmatella       | 0.1        | 0.5    | 0.2    | 5.6    | 2.5     | 0.0        | 0.0    | 0.1    | 0.0    | 0.1     | 0.0        | 0.1    | 0.1    | 0.1    | 0.1     | 0.0        | 0.3    | 0.0    | 0.2    | 0.0     | 0.0        | 0.0    | 0.0    | 0.0    | 0.2     |     |
| Stemmatella       | 0.0        | 0.2    | 0.1    | 0.2    | 0.0     | 0.0        | 0.0    | 0.0    | 0.0    | 0.0     | 0.0        | 0.0    | 0.0    | 0.0    | 0.0     | 0.0        | 0.0    | 0.0    | 0.0    | 0.0     | 0.0        | 0.0    | 0.0    | 0.0    | 0.0     |     |
| Serratia          | 0.0        | 0.0    | 0.0    | 0.0    | 0.0     | 0.0        | 0.0    | 0.0    | 0.0    | 0.0     | 0.0        | 0.0    | 0.0    | 0.0    | 0.0     | 0.0        | 0.0    | 0.0    | 0.0    | 0.0     | 0.0        | 0.0    | 0.0    | 0.0    | 0.0     |     |
| Pseudomonas       | 0.0        | 0.0    | 0.0    | 0.1    | 0.3     | 0.0        | 0.0    | 0.0    | 0.0    | 0.0     | 0.0        | 0.0    | 0.0    | 0.1    | 0.1     | 0.0        | 0.0    | 0.0    | 0.1    | 0.2     | 1.0        | 0.0    | 2.0    | 0.0    | 0.0     |     |
| Gemella           | 0.0        | 0.2    | 0.0    | 0.0    | 0.0     | 0.1        | 0.1    | 1.3    | 0.0    | 0.0     | 0.0        | 0.0    | 0.0    | 0.0    | 0.2     | 0.0        | 0.2    | 0.1    | 0.1    | 0.1     | 0.0        | 0.8    | 0.0    | 0.0    | 0.1     |     |
| Psychrobacter     | 0.0        | 0.3    | 0.0    | 0.0    | 0.0     | 0.0        | 0.1    | 0.2    | 1.2    | 0.0     | 0.4        | 0.0    | 0.0    | 0.0    | 0.0     | 0.0        | 0.0    | 0.0    | 0.2    | 0.0     | 0.0        | 0.0    | 0.0    | 0.0    | 0.0     |     |
| Adaptophila       | 0.0        | 0.1    | 0.0    | 0.0    | 0.0     | 0.0        | 0.2    | 1.2    | 0.0    | 0.0     | 0.0        | 0.0    | 0.0    | 0.0    | 0.0     | 0.0        | 0.1    | 0.0    | 0.2    | 0.0     | 0.0        | 0.0    | 0.0    | 0.0    | 0.0     |     |
| Mycobacterium     | 0.0        | 0.2    | 1.0    | 0.9    | 0.1     | 0.2        | 0.8    | 0.9    | 0.5    | 1.4     | 0.4        | 0.4    | 0.5    | 0.8    | 1.2     | 0.1        | 0.1    | 0.2    | 0.1    | 0.5     | 0.0        | 0.1    | 0.3    | 0.2    | 0.1     |     |
| Enterococcus      | 0.0        | 0.2    | 0.0    | 0.0    | 0.0     | 0.0        | 0.1    | 0.2    | 0.0    | 0.1     | 0.0        | 0.1    | 0.0    | 0.1    | 0.0     | 0.0        | 0.0    | 0.0    | 0.0    | 0.0     | 0.0        | 0.0    | 0.0    | 0.0    | 0.0     |     |
| Acidimicrobium    | 0.0        | 0.0    | 0.0    | 0.0    | 0.1     | 0.0        | 0.1    | 0.8    | 0.0    | 0.1     | 0.0        | 0.0    | 0.0    | 0.0    | 0.0     | 0.0        | 0.0    | 0.4    | 0.0    | 0.0     | 0.0        | 0.0    | 0.0    | 0.0    | 0.0     |     |
| Mastella          | 0.0        | 0.0    | 0.0    | 0.1    | 0.0     | 0.0        | 0.0    | 0.0    | 0.0    | 0.0     | 1.6        | 0.0    | 0.0    | 0.0    | 0.3     | 0.0        | 0.0    | 0.2    | 0.0    | 0.2     | 0.0        | 0.1    | 0.0    | 0.0    | 0.0     |     |
| Brevundimonas     | 0.0        | 0.0    | 0.5    | 0.1    | 0.1     | 0.0        | 0.0    | 0.1    | 0.2    | 0.6     | 0.8        | 1.4    | 0.3    | 0.0    | 0.0     | 0.0        | 0.0    | 0.0    | 0.1    | 0.2     | 0.0        | 0.0    | 0.0    | 0.1    | 1.1     |     |
| Micromonospora    | 0.0        | 0.1    | 0.0    | 0.0    | 0.0     | 0.0        | 0.0    | 0.0    | 0.0    | 0.0     | 0.0        | 0.0    | 0.0    | 0.0    | 0.0     | 0.0        | 0.0    | 0.0    | 0.1    | 0.0     | 0.0        | 0.0    | 0.0    | 0.0    | 0.0     |     |
| Kingella          | 0.0        | 0.0    | 0.0    | 0.4    | 0.2     | 0.0        | 0.0    | 0.1    | 0.0    | 0.0     | 0.0        | 0.6    | 0.1    | 0.7    | 0.7     | 0.0        | 0.1    | 0.1    | 0.0    | 0.0     | 0.5        | 0.0    | 0.8    | 0.8    | 0.2     |     |
| Dermacoccus       | 0.1        | 0.1    | 1.0    | 0.1    | 0.1     | 0.0        | 0.0    | 0.1    | 0.0    | 0.3     | 0.3        | 0.3    | 0.3    | 0.1    | 0.0     | 0.0        | 0.0    | 0.2    | 0.2    | 0.0     | 0.0        | 0.0    | 0.0    | 0.0    | 0.0     |     |
| Lactobacillus     | 0.0        | 0.0    | 0.0    | 0.1    | 0.0     | 0.0        | 0.0    | 0.1    | 0.0    | 0.0     | 0.0        | 0.0    | 0.0    | 0.0    | 0.8     | 0.0        | 0.0    | 0.0    | 0.0    | 0.0     | 0.0        | 0.0    | 0.0    | 0.0    | 0.0     |     |
| Fusobacterium     | 0.0        | 0.1    | 0.3    | 0.0    | 0.0     | 0.0        | 0.1    | 0.7    | 0.0    | 0.1     | 0.0        | 0.0    | 0.0    | 0.0    | 0.0     | 0.0        | 0.1    | 0.0    | 0.1    | 0.0     | 0.0        | 0.0    | 0.0    | 0.0    | 0.0     |     |
| Eikenella         | 0.0        | 0.0    | 0.0    | 0.1    | 0.3     | 0.0        | 0.0    | 0.1    | 0.0    | 0.1     | 0.2        | 0.4    | 0.2    | 0.6    | 0.5     | 0.0        | 0.0    | 0.0    | 0.0    | 0.0     | 0.7        | 0.0    | 0.8    | 0.1    | 0.1     |     |
| Mycobacterium     | 0.0        | 0.2    | 1.0    | 0.2    | 0.1     | 0.0        | 0.1    | 0.2    | 0.2    | 0.3     | 0.0        | 0.1    | 0.1    | 0.2    | 0.2     | 0.1        | 0.1    | 0.1    | 0.3    | 0.0     | 0.1        | 0.1    | 0.0    | 0.0    | 0.1     |     |
| Gordonia          | 0.0        | 0.1    | 0.0    | 0.0    | 0.0     | 0.0        | 0.2    | 0.4    | 0.0    | 0.1     | 0.0        | 0.1    | 0.0    | 0.1    | 0.1     | 0.1        | 0.2    | 0.4    | 0.1    | 0.0     | 0.1        | 0.0    | 0.0    | 0.0    | 0.0     |     |
| Tessaracoccus     | 0.0        | 0.1    | 0.1    | 0.2    | 0.1     | 0.0        | 0.3    | 0.1    | 0.1    | 0.0     | 0.0        | 0.0    | 0.2    | 0.2    | 0.0     | 0.1        | 0.1    | 0.2    | 0.2    | 0.0     | 0.3        | 0.1    | 0.1    | 0.2    | 0.2     |     |
| Rhodococcus       | 0.0        | 0.1    | 0.1    | 0.1    | 0.0     | 0.0        | 0.2    | 0.3    | 0.5    | 0.3     | 0.0        | 0.1    | 0.1    | 0.4    | 0.1     | 0.0        | 0.1    | 0.1    | 0.4    | 0.0     | 0.1        | 0.1    | 0.1    | 0.1    | 0.0     |     |
| Melioides         | 0.0        | 0.0    | 0.0    | 0.0    | 0.0     | 0.0        | 0.0    | 0.0    | 0.0    | 0.0     | 0.0        | 0.0    | 0.0    | 0.0    | 0.1     | 0.0        | 0.0    | 0.0    | 0.0    | 0.0     | 0.0        | 0.0    | 0.0    | 0.0    | 0.0     |     |
| Pseudellamassalia | 0.0        | 0.0    | 0.0    | 0.0    | 0.0     | 0.0        | 0.0    | 0.5    | 0.0    | 0.0     | 0.0        | 0.0    | 0.0    | 0.0    | 0.0     | 0.0        | 0.0    | 0.0    | 0.3    | 0.0     | 0.0        | 0.0    | 0.0    | 0.0    | 0.0     |     |
| Povallibacter     | 0.0        | 0.1    | 0.2    | 0.0    | 0.0     | 0.0        | 0.0    | 0.0    | 0.0    | 0.0     | 0.0        | 0.0    | 0.0    | 0.0    | 0.0     | 0.0        | 0.0    | 0.0    | 0.1    | 0.0     | 0.0        | 0.0    | 0.0    | 0.0    | 0.0     |     |
| Lorileopsis       | 0.0        | 0.0    | 0.0    | 0.1    | 0.1     | 0.0        | 0.0    | 0.0    | 0.0    | 0.0     | 0.0        | 0.0    | 0.0    | 0.0    | 0.0     | 0.0        | 0.0    | 0.0    | 0.0    | 0.0     | 0.0        | 0.0    | 0.0    | 0.0    | 0.0     |     |
| Micromonospora    | 0.0        | 0.1    | 0.0    | 1.2    | 0.0     | 0.0        | 0.1    | 0.1    | 0.1    | 0.1     | 0.0        | 0.1    | 0.0    | 0.1    | 0.0     | 0.0        | 0.0    | 0.2    | 0.0    | 0.0     | 0.0        | 0.1    | 0.0    | 0.0    | 0.1     |     |
| Mycobacterium     | 0.0        | 0.0    | 0.0    | 0.0    | 0.0     | 0.0        | 0.0    | 0.0    | 0.0    | 0.0     | 0.0        | 0.0    | 0.0    | 0.0    | 0.0     | 0.0        | 0.0    | 0.0    | 0.0    | 0.0     | 0.0        | 0.0    | 0.0    | 0.0    | 0.0     |     |
| Chryseobacterium  | 0.0        | 0.0    | 0.0    | 0.0    | 0.0     | 0.0        | 0.4    | 0.1    | 0.2    | 0.0     | 0.0        | 0.0    | 0.1    | 0.0    | 0.0     | 0.2        | 0.5    | 0.0    | 0.0    | 0.0     | 0.0        | 0.0    | 0.0    | 0.0    | 0.0     |     |
| Chryseobacterium  | 0.0        | 0.1    | 0.1    | 0.1    | 0.0     | 0.0        | 0.1    | 0.1    | 0.0    | 0.0     | 0.2        | 0.2    | 0.0    | 0.0    | 0.0     |            |        |        |        |         |            |        |        |        |         |     |

| Taxa             | Subject 11 |        |        |        | Subject 12 |        |        |        | Subject 13 |          |        |        | Subject 14 |         |          |        | Subject 15 |        |         |          |        |        |        |         |      |
|------------------|------------|--------|--------|--------|------------|--------|--------|--------|------------|----------|--------|--------|------------|---------|----------|--------|------------|--------|---------|----------|--------|--------|--------|---------|------|
|                  | Baseline   | Week 2 | Week 4 | Week 8 | Baseline   | Week 2 | Week 4 | Week 8 | Week 12    | Baseline | Week 2 | Week 4 | Week 8     | Week 12 | Baseline | Week 2 | Week 4     | Week 8 | Week 12 | Baseline | Week 2 | Week 4 | Week 8 | Week 12 |      |
| Colibacterium    | 22.3       | 23.0   | 32.8   | 50.4   | 41.6       | 39.1   | 30.5   | 31.7   | 47.7       | 41.7     | 74     | 7.6    | 37.2       | 30.2    | 41.2     | 17.4   | 18.1       | 14.4   | 54.7    | 49.2     | 38.1   | 35.2   | 38.5   | 53.8    | 57.0 |
| Corynebacterium  | 44.1       | 11.7   | 11.2   | 16.2   | 16.1       | 11.9   | 11.9   | 2.1    | 2.1        | 2.1      | 48.7   | 51.1   | 87.7       | 42.2    | 36.8     | 0.1    | 1.5        | 0.1    | 42.2    | 19.8     | 0.1    | 42.2   | 19.8   | 0.1     | 41.1 |
| Corynebacterium  | 11.2       | 15.3   | 16.2   | 13.8   | 14.1       | 5.8    | 5.8    | 5.0    | 5.1        | 4.5      | 3.9    | 6.8    | 58.8       | 15.8    | 13.1     | 0.8    | 1.4        | 3.3    | 0.2     | 0.2      | 0.3    | 4.3    | 0.6    | 0.8     | 0.8  |
| Streptococcus    | 15.3       | 15.4   | 13.3   | 5.4    | 6.0        | 19.0   | 18.4   | 18.7   | 18.7       | 1.7      | 1.9    | 3.5    | 45.5       | 11.9    | 18.7     | 9.8    | 8.0        | 8.6    | 1.1     | 0.2      | 5.0    | 6.3    | 5.4    | 8.9     | 11.4 |
| Streptococcus    | 0.0        | 0.0    | 0.1    | 0.0    | 0.1        | 0.0    | 0.1    | 0.2    | 0.1        | 0.0      | 0.0    | 0.1    | 1.0        | 16.0    | 16.0     | 16.0   | 16.2       | 16.2   | 13.3    | 13.3     | 0.0    | 0.0    | 0.0    | 0.0     | 0.1  |
| Moraxella        | 0.2        | 0.2    | 0.0    | 1.6    | 4.5        | 8.2    | 0.7    | 8.1    | 7.2        | 10.3     | 15.1   | 19.4   | 7.0        | 1.4     | 0.1      | 0.3    | 0.4        | 2.9    | 0.5     | 0.0      | 2.1    | 2.5    | 11.3   | 0.4     | 0.7  |
| Finnefella       | 0.7        | 1.3    | 1.5    | 2.8    | 0.5        | 0.1    | 0.3    | 0.5    | 0.0        | 0.4      | 0.1    | 0.1    | 0.0        | 0.8     | 0.0      | 0.1    | 0.1        | 0.7    | 0.2     | 0.0      | 0.0    | 0.0    | 0.0    | 0.0     | 0.0  |
| Acinetobacter    | 0.0        | 0.0    | 0.1    | 0.1    | 0.0        | 0.4    | 0.9    | 0.6    | 0.2        | 0.1      | 1.7    | 0.8    | 6.6        | 4.4     | 1.2      | 2.5    | 2.6        | 1.1    | 1.5     | 0.0      | 0.0    | 0.0    | 0.0    | 0.0     | 0.5  |
| Acinetobacter    | 0.0        | 0.0    | 0.4    | 0.4    | 0.4        | 0.4    | 0.1    | 0.1    | 0.2        | 0.2      | 0.0    | 0.0    | 0.0        | 0.0     | 0.0      | 0.0    | 0.0        | 0.0    | 0.0     | 0.0      | 0.0    | 0.0    | 0.0    | 0.0     | 0.0  |
| Roseomonas       | 0.0        | 0.0    | 0.0    | 0.1    | 0.3        | 0.0    | 0.1    | 0.5    | 2.4        | 2.6      | 0.0    | 0.2    | 0.4        | 1.4     | 3.8      | 0.0    | 0.0        | 0.0    | 0.0     | 0.0      | 0.0    | 0.0    | 0.0    | 0.0     | 0.0  |
| Neisseria        | 0.1        | 0.5    | 0.1    | 0.1    | 1.5        | 1.9    | 3.2    | 0.7    | 0.1        | 0.4      | 0.0    | 0.0    | 0.9        | 2.0     | 0.0      | 0.2    | 2.5        | 0.3    | 2.0     | 0.1      | 0.0    | 0.4    | 0.0    | 1.3     | 0.5  |
| Neisseria        | 0.6        | 0.7    | 0.2    | 0.0    | 0.7        | 1.3    | 1.3    | 0.3    | 0.3        | 0.3      | 0.0    | 0.0    | 0.8        | 0.8     | 0.4      | 0.8    | 0.8        | 0.8    | 0.8     | 0.0      | 0.1    | 1.0    | 1.1    | 0.0     | 1.0  |
| Prevotella       | 0.2        | 0.2    | 1.3    | 1.2    | 0.6        | 0.2    | 0.9    | 0.0    | 0.0        | 0.0      | 0.0    | 0.0    | 2.3        | 0.0     | 0.0      | 0.0    | 0.0        | 0.9    | 0.1     | 0.0      | 0.0    | 0.2    | 0.0    | 1.3     | 1.2  |
| Anaerococcus     | 0.4        | 1.3    | 3.3    | 0.5    | 0.7        | 0.0    | 0.1    | 0.3    | 0.1        | 0.1      | 0.0    | 0.2    | 0.0        | 0.4     | 0.0      | 0.0    | 0.0        | 0.8    | 0.2     | 0.0      | 0.0    | 0.1    | 1.4    | 0.1     | 0.1  |
| Kocuria          | 0.1        | 0.1    | 0.6    | 0.3    | 0.6        | 0.0    | 0.4    | 0.4    | 1.4        | 1.3      | 0.0    | 0.0    | 0.1        | 0.7     | 0.0      | 0.0    | 0.1        | 1.4    | 0.4     | 0.0      | 0.0    | 0.1    | 0.1    | 0.1     | 0.1  |
| Haemophilus      | 0.0        | 0.0    | 0.3    | 0.3    | 0.4        | 0.2    | 0.3    | 0.3    | 0.2        | 0.0      | 0.0    | 0.1    | 2.3        | 0.4     | 0.7      | 0.7    | 0.4        | 0.3    | 0.0     | 0.0      | 0.0    | 0.2    | 1.9    | 2.0     | 1.3  |
| Paracoccus       | 0.1        | 0.2    | 0.2    | 0.1    | 0.1        | 0.2    | 0.3    | 1.3    | 6.3        | 9.7      | 0.2    | 3.6    | 0.1        | 1.3     | 1.8      | 0.0    | 0.0        | 0.1    | 0.0     | 0.0      | 0.0    | 0.0    | 0.0    | 0.1     | 0.0  |
| Lawsonella       | 0.2        | 0.4    | 0.8    | 0.2    | 0.3        | 0.2    | 0.7    | 1.5    | 0.1        | 0.1      | 0.1    | 0.2    | 0.0        | 1.2     | 0.3      | 0.0    | 0.2        | 0      | 0.1     | 0.0      | 0.0    | 0.0    | 0.0    | 0.0     | 0.0  |
| Bacteroides      | 0.2        | 1.0    | 3.4    | 0.2    | 0.3        | 0.2    | 0.1    | 0.2    | 0.1        | 0.4      | 0.0    | 0.1    | 1.5        | 1.2     | 0.2      | 1.1    | 0.0        | 0.0    | 0.0     | 0.0      | 0.0    | 0.0    | 0.0    | 0.0     | 0.0  |
| Methylobacterium | 0.0        | 0.0    | 0.3    | 0.8    | 0.0        | 0.1    | 0.2    | 0.6    | 1.2        | 0.0      | 0.1    | 0.0    | 0.1        | 0.0     | 0.0      | 0.0    | 0.0        | 0.0    | 0.0     | 0.0      | 0.0    | 0.0    | 0.0    | 0.0     | 0.0  |
| Veillonella      | 0.0        | 0.0    | 0.1    | 0.0    | 0.0        | 0.6    | 0.8    | 0.0    | 0.0        | 0.0      | 0.0    | 0.0    | 1.2        | 0.0     | 0.0      | 0.0    | 0.1        | 0.5    | 0.0     | 0.0      | 0.0    | 0.8    | 0.0    | 0.8     | 0.2  |
| Paracoccus       | 0.1        | 0.0    | 0.0    | 0.0    | 0.4        | 2.0    | 0.8    | 0.0    | 0.2        | 0.0      | 0.0    | 0.4    | 5.3        | 0.0     | 0.0      | 0.1    | 0.0        | 0.4    | 0.0     | 0.0      | 0.0    | 0.0    | 2.4    | 0.0     | 0.0  |
| Sphingomonas     | 0.0        | 0.0    | 0.0    | 0.2    | 0.0        | 0.3    | 0.3    | 1.1    | 2.0        | 0.0      | 0.0    | 1.1    | 0.3        | 0.0     | 0.0      | 0.2    | 0.5        | 0.5    | 0.0     | 0.0      | 0.0    | 1.5    | 0.1    | 0.0     | 0.0  |
| Williamsia       | 0.0        | 0.0    | 0.0    | 0.0    | 0.8        | 1.0    | 1.2    | 8.4    | 4.9        | 0.0      | 0.0    | 0.0    | 0.7        | 0.0     | 0.0      | 0.0    | 0.0        | 1.0    | 0.3     | 0.0      | 0.0    | 0.0    | 0.0    | 0.0     | 0.0  |
| Penicillium      | 0.2        | 0.8    | 0.2    | 0.7    | 2.5        | 0.2    | 0.2    | 0.6    | 0.3        | 0.2      | 0.0    | 0.0    | 0.6        | 0.0     | 0.4      | 0.0    | 0.5        | 0.1    | 0.3     | 0.0      | 0.0    | 0.0    | 0.0    | 0.0     | 0.0  |
| Neisseria        | 0.2        | 0.6    | 0.6    | 0.4    | 0.4        | 0.3    | 0.4    | 0.3    | 0.3        | 0.0      | 0.2    | 0.3    | 0.4        | 0.3     | 0.1      | 0.1    | 0.3        | 0.3    | 0.0     | 0.0      | 0.0    | 0.3    | 0.3    | 0.3     | 0.3  |
| Escherichia      | 0.0        | 0.0    | 0.0    | 0.0    | 0.0        | 0.0    | 0.0    | 0.0    | 0.0        | 0.0      | 0.0    | 0.0    | 0.0        | 0.0     | 0.0      | 0.0    | 0.0        | 0.0    | 0.0     | 0.0      | 0.0    | 0.0    | 0.0    | 0.0     | 0.0  |
| Stenotrophomonas | 0.0        | 0.0    | 0.2    | 0.9    | 0.0        | 0.0    | 0.0    | 0.0    | 0.2        | 0.0      | 0.3    | 0.0    | 0.0        | 1.1     | 0.0      | 0.3    | 0.3        | 0.0    | 0.0     | 0.0      | 0.0    | 0.0    | 0.0    | 0.0     | 0.0  |
| Moraxella        | 0.0        | 0.0    | 0.0    | 0.0    | 0.0        | 0.0    | 0.0    | 0.0    | 0.0        | 0.0      | 0.0    | 0.0    | 0.3        | 0.0     | 0.0      | 0.0    | 0.0        | 0.0    | 0.0     | 0.0      | 0.0    | 0.0    | 0.0    | 0.0     | 0.0  |
| Serratia         | 0.0        | 0.0    | 0.0    | 0.3    | 0.0        | 0.0    | 0.0    | 0.0    | 0.0        | 0.0      | 0.0    | 0.0    | 0.0        | 0.0     | 0.0      | 0.6    | 0.9        | 0.0    | 0.2     | 0.0      | 0.0    | 0.0    | 0.0    | 0.0     | 0.0  |
| Pseudomonas      | 0.0        | 0.0    | 0.0    | 0.0    | 0.0        | 0.1    | 0.0    | 0.0    | 0.0        | 0.0      | 0.2    | 0.0    | 0.0        | 0.0     | 0.0      | 0.5    | 1.1        | 0.3    | 0.0     | 0.0      | 0.0    | 0.0    | 0.1    | 0.0     | 0.0  |
| Gemella          | 0.0        | 0.4    | 0.2    | 0.0    | 0.0        | 0.5    | 0.6    | 0.0    | 0.1        | 0.0      | 0.0    | 0.7    | 0.0        | 0.0     | 0.0      | 0.1    | 0.0        | 0.0    | 0.0     | 0.0      | 0.3    | 0.7    | 0.7    | 0.6     | 0.6  |
| Stenotrophomonas | 0.0        | 0.0    | 0.0    | 0.0    | 0.0        | 0.0    | 0.0    | 0.0    | 0.0        | 0.0      | 0.0    | 0.0    | 0.0        | 0.0     | 0.0      | 0.0    | 0.0        | 0.0    | 0.0     | 0.0      | 0.0    | 0.0    | 0.0    | 0.0     | 0.0  |
| Adaptophila      | 0.0        | 0.1    | 0.0    | 0.2    | 0.0        | 0.4    | 0.4    | 0.3    | 0.2        | 0.0      | 0.0    | 0.0    | 0.0        | 0.0     | 0.0      | 0.0    | 0.1        | 0.0    | 0.0     | 0.0      | 0.3    | 0.3    | 0.5    | 0.5     | 0.0  |
| Mycobacterium    | 0.0        | 0.1    | 0.7    | 0.1    | 0.0        | 0.1    | 0.2    | 0.2    | 2.3        | 0.0      | 0.0    | 0.2    | 0.1        | 0.0     | 0.0      | 0.0    | 0.2        | 0.0    | 0.0     | 0.0      | 0.4    | 0.4    | 0.0    | 0.0     | 0.0  |
| Enterococcus     | 0.2        | 0.2    | 0.2    | 0.2    | 0.8        | 0.8    | 0.3    | 0.4    | 0.4        | 0.0      | 0.0    | 0.2    | 0.4        | 0.4     | 0.0      | 0.4    | 0.5        | 0.5    | 0.2     | 0.5      | 0.0    | 0.0    | 0.0    | 0.0     | 0.0  |
| Actinomyces      | 0.0        | 0.2    | 0.1    | 0.2    | 0.0        | 0.0    | 0.0    | 0.1    | 0.1        | 0.0      | 0.1    | 1.4    | 0.1        | 0.0     | 0.0      | 0.0    | 0.0        | 0.0    | 0.0     | 0.0      | 0.0    | 0.0    | 0.5    | 0.0     | 0.0  |
| Massilia         | 0.0        | 0.0    | 0.0    | 0.0    | 0.0        | 0.0    | 0.0    | 0.0    | 0.0        | 0.0      | 0.0    | 0.0    | 0.0        | 0.0     | 0.0      | 0.0    | 0.0        | 0.0    | 0.0     | 0.0      | 0.0    | 0.0    | 0.0    | 0.0     | 0.0  |
| Brevundimonas    | 0.0        | 0.0    | 0.2    | 0.0    | 0.0        | 0.1    | 0.0    | 0.0    | 0.4        | 0.0      | 2.1    | 0.0    | 0.0        | 0.7     | 0.0      | 0.0    | 0.0        | 0.0    | 0.0     | 0.0      | 0.0    | 0.8    | 0.8    | 0.0     | 0.0  |
| Brucella         | 0.2        | 0.4    | 0.4    | 0.2    | 0.0        | 0.3    | 0.1    | 0.3    | 0.3        | 0.0      | 0.0    | 0.2    | 1.6        | 0.0     | 0.0      | 0.0    | 0.2        | 0.2    | 0.0     | 0.0      | 0.0    | 0.0    | 0.1    | 0.2     | 0.1  |
| Kingella         | 0.0        | 0.0    | 0.0    | 0.1    | 0.0        | 0.0    | 0.0    | 0.0    | 0.0        | 0.0      | 0.2    | 1.3    | 0.0        | 0.1     | 0.5      | 0.1    | 1.1        | 0.0    | 0.0     | 0.0      | 0.0    | 0.0    | 0.0    | 0.0     | 0.1  |
| Demarcoccus      | 0.0        | 0.0    | 0.2    | 0.1    | 0.0        | 0.2    | 1.0    | 2.4    | 1.9        | 0.0      | 0.1    | 0.0    | 0.3        | 0.0     | 0.0      | 0.0    | 0.5        | 0.0    | 0.0     | 0.0      | 0.0    | 0.0    | 0.0    | 0.0     | 0.0  |
| Brucella         | 0.0        | 0.0    | 0.0    | 0.0    | 0.1        | 0.4    | 1.4    | 1.2    | 0.0        | 0.0      | 0.0    | 0.0    | 0.0        | 0.0     | 0.0      | 0.0    | 0.0        | 0.0    | 0.0     | 0.0      | 1.0    | 0.3    | 0.0    | 0.0     | 0.0  |
| Fusobacterium    | 0.0        | 0.0    | 0.1    | 0.0    | 0.0        | 1.5    | 0.2    | 0.0    | 0.0        | 0.0      | 0.0    | 0.0    | 0.0        | 0.0     | 0.0      | 0.0    | 0.1        | 0.0    | 0.0     | 0.0      | 0.0    | 0.0    | 0.0    | 0.0     | 0.0  |
| Eikenella        | 0.0        | 0.0    | 0.0    | 0.1    | 0.0        | 0.0    | 0.1    | 0.0    | 0.0        | 0.0      | 0.0    | 0.1    | 0.1        | 0.0     | 0.0      | 0.7    | 0.2        | 1.9    | 0.0     | 0.0      | 0.0    | 0.0    | 0.0    | 0.0     | 0.0  |
| Mycobacterium    | 0.0        | 0.1    | 0.2    | 0.1    | 0.0        | 0.1    | 0.1    | 0.1    | 0.1        | 0.8      | 0.0    | 0.1    | 0.0        | 0.1     | 0.2      | 0.0    | 0.1        | 0.1    | 0.0     | 0.0      | 0.0    | 0.1    | 0.0    | 0.0     | 0.0  |
| Gordonia         | 0.0        | 0.1    | 0.3    | 0.1    | 0.0        | 0.0    | 0.0    | 0.0    | 0.0        | 0.0      | 0.3    | 0.0    | 0.0        | 0.0     | 0.0      | 0.0    | 0.0        | 0.0    | 0.0     | 0.0      | 0.0    | 0.0    | 0.0    | 0.0     | 0.0  |
| Tessarakombia    | 0.0        | 0.2    | 0.2    | 0.2    | 0.0        | 0.1    | 0.2    | 0.4    | 0.3        | 0.0      | 0.0    | 0.1    | 0.1        | 0.1     | 0.0      | 0.1    | 0.0        | 0.1    | 0.0     | 0.1      | 0.1    | 0.2    | 0.1    | 0.1     | 0.2  |
| Rhodococcus      | 0.0        | 0.1    | 0.2    | 0.1    | 0.0        | 0.1    | 0.2    | 0.6    | 0.5        | 0.0      | 0.0    | 0.1    | 0.1        | 0.0     | 0.0      | 0.0    | 0.1        | 0.0    | 0.0     | 0.0      | 0.0    | 0.0    | 0.0    | 0.0     | 0.0  |
| Methylobacterium | 0.0        | 0.1    | 0.0    | 0.0    | 0.0        | 0.0    | 0.0    | 0.0    | 0.0        | 0.0      | 0.0    | 0.0    | 0.0        | 0.0     | 0.0      | 0.0    | 0.0        | 0.0    | 0.0     | 0.0      | 0.0    | 0.0    | 0.0    | 0.0     | 0.0  |
| Prevotella       | 0.0        | 0.0    | 0.0    | 0.0    | 0.0        | 0.0    | 0.0    | 0.3    | 0.0        | 0.0      | 0.0    | 0.0    | 0.0        | 0.0     | 0.0      | 0.0    | 0.0        | 0.0    | 0.0     | 0.0      | 0.0    | 0.0    | 0.0    | 0.0     | 0.0  |
| Povallibacterium | 0.0        | 0.0    | 0.2    | 0.2    | 0.0        | 0.0    | 0.0    | 0.1    | 0.0        | 0.0      | 0.0    | 0.0    | 0.2        | 0.0     | 0.0      | 0.0    | 0.0        | 0.3    | 0.0     | 0.0      | 0.1    | 0.1    | 0.0    | 0.0     | 0.1  |
| Lorileptella     | 0.0        | 0.0    | 0.0    | 0.1    | 0.0        | 0.0    | 0.0    | 0.0    | 0.0        | 0.0      | 0.0    | 0.0    | 0.1        | 0.0     | 0.0      | 0.1    | 0.1        | 0.4    | 0.0     | 0.0      | 0.3    | 0.0    | 0.0    | 0.0     | 0.0  |
| Micromodularium  | 0.0        | 0.1    | 0.0    | 0.0    | 0.0        | 0.0    | 0.0    | 0.0    | 0.0        | 0.0      | 0.0    | 0.0    | 0.0        | 0.0     | 0.0      | 0.0    | 0.0        | 1.3    | 0.2     | 0.0      | 0.0    | 0.0    | 0.0    | 0.0     | 0.0  |
| Methylobacterium | 0.0        | 0.0    | 0.1    | 0.0    | 0.0        | 0.0    | 0.0    | 0.0    | 0.0        | 0.0      | 0.0    | 0.0    | 0.0        | 0.0     | 0.0      | 0.0    | 0.0        | 0.0    | 0.0     | 0.0      | 0.0    | 0.0    | 0.0    | 0.0     | 0.0  |
| Chryseobacterium | 0.0        | 0.0    | 1.0    | 0.0    | 0.0        | 0.0    | 0.0    | 0.0    | 0.0        | 0.0      | 0.0    | 0.0    | 0.0        | 0.0     | 0.0      | 0.0    | 0.1        | 0.0    | 0.0     | 0.2      | 0.7    | 2.0    | 0.1    | 0.0     |      |
| Brucella         | 0.0        | 0.0    | 0.0    | 0.0    | 0.0        | 0.0    | 0.0    | 0.0    | 0.0        | 0.0      | 0.0    | 0.0    | 0.4        | 0.0     | 0.0      | 0.2    | 0.0        | 0.0    | 0       |          |        |        |        |         |      |

| Taxa             | Subject 16 |        |        |        |        |         |          |        |        |        |        |         | Subject 17 |        |        |        |        |         |          |        |        |        |        |         | Subject 18 |        |        |        |        |         |          |        |        |        |        |         | Subject 20 |     |  |  |  |  |  |  |  |  |  |  | Subject 22 |  |  |  |  |  |  |  |  |  |  |  |
|------------------|------------|--------|--------|--------|--------|---------|----------|--------|--------|--------|--------|---------|------------|--------|--------|--------|--------|---------|----------|--------|--------|--------|--------|---------|------------|--------|--------|--------|--------|---------|----------|--------|--------|--------|--------|---------|------------|-----|--|--|--|--|--|--|--|--|--|--|------------|--|--|--|--|--|--|--|--|--|--|--|
|                  | Baseline   | Week 2 | Week 4 | Week 6 | Week 8 | Week 12 | Baseline | Week 2 | Week 4 | Week 6 | Week 8 | Week 12 | Baseline   | Week 2 | Week 4 | Week 6 | Week 8 | Week 12 | Baseline | Week 2 | Week 4 | Week 6 | Week 8 | Week 12 | Baseline   | Week 2 | Week 4 | Week 6 | Week 8 | Week 12 | Baseline | Week 2 | Week 4 | Week 6 | Week 8 | Week 12 |            |     |  |  |  |  |  |  |  |  |  |  |            |  |  |  |  |  |  |  |  |  |  |  |
| Colibacterium    | 32.2       | 33.3   | 31.2   | 31.8   | 30.7   | 31.8    | 34.0     | 50.9   | 62.3   | 66.9   | 23.1   | 46.5    | 46.9       | 38.0   | 50.1   | 46.7   | 51.1   | 62.8    | 61.5     | 59.0   | 57.1   | 26.7   | 28.1   | 32.9    | 30.4       | 30.0   | 25.6   | 25.8   | 26.8   | 26.7    | 25.2     | 26.1   | 26.7   | 24.7   | 24.3   | 30.4    |            |     |  |  |  |  |  |  |  |  |  |  |            |  |  |  |  |  |  |  |  |  |  |  |
| Corynebacterium  | 23.9       | 26.0   | 25.6   | 22.7   | 23.2   | 4.1     | 5.6      | 10.3   | 3.3    | 4.5    | 4.9    | 9.9     | 8.2        | 14.0   | 3.1    | 0.8    | 0.7    | 0.9     | 0.8      | 0.6    | 2.4    | 2.8    | 4.3    | 5.9     | 16.8       | 0.0    | 0.0    | 0.0    | 0.0    | 0.0     | 0.0      | 0.0    | 0.0    | 0.0    | 0.0    | 0.0     | 0.0        |     |  |  |  |  |  |  |  |  |  |  |            |  |  |  |  |  |  |  |  |  |  |  |
| Moraxella        | 3.2        | 3.0    | 3.7    | 4.0    | 2.5    | 15.2    | 15.1     | 2.0    | 1.1    | 2.3    | 1.9    | 1.8     | 3.4        | 0.0    | 1.2    | 5.9    | 5.4    | 0.0     | 0.0      | 16.7   | 3.3    | 3.6    | 1.2    | 0.8     | 3.1        | 0.0    | 0.0    | 0.0    | 0.0    | 0.0     | 0.0      | 0.0    | 0.0    | 0.0    | 0.0    | 0.0     | 0.0        |     |  |  |  |  |  |  |  |  |  |  |            |  |  |  |  |  |  |  |  |  |  |  |
| Streptococcus    | 0.4        | 0.6    | 1.0    | 0.2    | 0.5    | 0.0     | 0.0      | 0.0    | 0.0    | 1.0    | 0.3    | 1.8     | 0.8        | 1.4    | 0.2    | 0.0    | 0.0    | 0.0     | 1.6      | 0.0    | 1.6    | 0.0    | 1.4    | 0.0     | 1.4        | 0.0    | 0.0    | 0.0    | 0.0    | 0.0     | 0.0      | 0.0    | 0.0    | 0.0    | 0.0    | 0.0     | 0.0        |     |  |  |  |  |  |  |  |  |  |  |            |  |  |  |  |  |  |  |  |  |  |  |
| Staphylococcus   | 0.2        | 0.0    | 0.5    | 1.3    | 0.1    | 0.0     | 0.0      | 0.0    | 0.0    | 0.0    | 0.0    | 0.5     | 0.7        | 0.0    | 0.4    | 0.6    | 0.7    | 1.7     | 1.7      | 0.5    | 1.0    | 1.4    | 12.9   | 11.6    | 2.4        | 0.0    | 0.0    | 0.0    | 0.0    | 0.0     | 0.0      | 0.0    | 0.0    | 0.0    | 0.0    | 0.0     | 0.0        | 0.0 |  |  |  |  |  |  |  |  |  |  |            |  |  |  |  |  |  |  |  |  |  |  |
| Finnefella       | 0.2        | 0.1    | 0.0    | 0.3    | 0.0    | 7.8     | 4.7      | 4.3    | 2.6    | 2.2    | 0.0    | 1.0     | 0.4        | 0.0    | 0.0    | 0.0    | 0.1    | 0.3     | 0.2      | 0.2    | 0.0    | 0.0    | 0.0    | 0.1     | 0.8        | 0.0    | 0.0    | 0.0    | 0.0    | 0.0     | 0.0      | 0.0    | 0.1    | 0.0    | 0.0    | 0.0     | 0.0        |     |  |  |  |  |  |  |  |  |  |  |            |  |  |  |  |  |  |  |  |  |  |  |
| Acinetobacter    | 0.3        | 0.2    | 0.0    | 0.1    | 0.8    | 0.0     | 0.1      | 0.0    | 0.0    | 2.8    | 0.0    | 0.0     | 0.0        | 0.0    | 0.0    | 0.0    | 0.0    | 0.1     | 0.4      | 0.1    | 0.0    | 0.0    | 0.1    | 0.1     | 0.0        | 0.0    | 0.0    | 0.0    | 0.0    | 0.0     | 0.0      | 0.0    | 0.1    | 0.1    | 0.0    | 0.0     |            |     |  |  |  |  |  |  |  |  |  |  |            |  |  |  |  |  |  |  |  |  |  |  |
| Deinococcus      | 0.0        | 0.0    | 0.0    | 0.0    | 0.0    | 0.0     | 0.0      | 0.0    | 0.0    | 1.7    | 0.0    | 0.0     | 0.0        | 0.0    | 0.0    | 0.0    | 0.0    | 0.2     | 0.0      | 0.0    | 0.0    | 0.0    | 0.7    | 5.3     | 4.3        | 5.3    | 0.0    | 0.0    | 0.0    | 0.0     | 0.0      | 0.0    | 0.0    | 0.0    | 0.0    | 0.0     |            |     |  |  |  |  |  |  |  |  |  |  |            |  |  |  |  |  |  |  |  |  |  |  |
| Roseomonas       | 0.0        | 0.0    | 0.0    | 0.0    | 0.2    | 0.0     | 0.0      | 0.0    | 0.0    | 0.0    | 0.0    | 0.0     | 0.0        | 0.0    | 0.0    | 0.0    | 0.0    | 0.4     | 0.0      | 0.1    | 0.0    | 0.0    | 0.0    | 0.0     | 0.0        | 0.0    | 0.0    | 0.0    | 0.0    | 0.0     | 0.0      | 0.0    | 0.0    | 0.0    | 0.0    | 0.0     |            |     |  |  |  |  |  |  |  |  |  |  |            |  |  |  |  |  |  |  |  |  |  |  |
| Neisseria        | 0.0        | 0.1    | 0.3    | 0.0    | 2.0    | 0.1     | 0.7      | 0.0    | 1.0    | 0.1    | 0.0    | 0.1     | 0.3        | 2.1    | 8.5    | 0.0    | 0.3    | 0.3     | 1.0      | 0.3    | 0.0    | 0.5    | 0.0    | 0.1     | 0.2        | 0.0    | 0.0    | 0.0    | 0.0    | 0.0     | 0.0      | 0.0    | 0.0    | 0.0    | 0.0    | 0.0     | 0.0        |     |  |  |  |  |  |  |  |  |  |  |            |  |  |  |  |  |  |  |  |  |  |  |
| Thiobacillus     | 0.2        | 0.0    | 0.7    | 0.7    | 0.8    | 0.0     | 0.2      | 0.0    | 0.0    | 0.0    | 0.0    | 0.8     | 0.0        | 0.0    | 0.2    | 0.0    | 0.0    | 0.0     | 0.0      | 0.0    | 0.0    | 0.0    | 0.1    | 0.0     | 0.0        | 0.0    | 0.0    | 0.0    | 0.0    | 0.0     | 0.0      | 0.0    | 0.0    | 0.0    | 0.0    | 0.0     | 0.0        |     |  |  |  |  |  |  |  |  |  |  |            |  |  |  |  |  |  |  |  |  |  |  |
| Pseudella        | 0.0        | 0.1    | 1.7    | 0.8    | 1.9    | 0.1     | 1.5      | 0.0    | 0.0    | 0.0    | 0.0    | 0.2     | 0.0        | 0.0    | 0.0    | 0.0    | 0.1    | 0.3     | 0.1      | 1.0    | 0.7    | 0.1    | 0.5    | 0.1     | 0.0        | 0.0    | 0.0    | 0.0    | 0.0    | 0.0     | 0.0      | 0.0    | 0.1    | 0.0    | 0.0    | 0.0     | 0.0        |     |  |  |  |  |  |  |  |  |  |  |            |  |  |  |  |  |  |  |  |  |  |  |
| Anaerococcus     | 0.0        | 0.0    | 0.4    | 0.0    | 0.5    | 0.0     | 1.0      | 2.7    | 1.4    | 0.0    | 0.1    | 1.8     | 4.2        | 0.0    | 0.0    | 0.0    | 0.0    | 0.3     | 0.0      | 0.1    | 0.0    | 0.0    | 0.0    | 0.7     | 0.1        | 0.0    | 0.0    | 0.0    | 0.0    | 0.0     | 0.0      | 0.1    | 0.0    | 0.0    | 0.0    | 0.0     | 0.0        |     |  |  |  |  |  |  |  |  |  |  |            |  |  |  |  |  |  |  |  |  |  |  |
| Kocuria          | 0.0        | 0.1    | 0.1    | 0.1    | 0.2    | 0.0     | 0.2      | 0.5    | 0.0    | 2.3    | 0.0    | 0.0     | 0.0        | 0.0    | 0.0    | 0.0    | 0.1    | 0.2     | 0.1      | 0.1    | 0.0    | 0.0    | 0.1    | 0.0     | 0.0        | 0.0    | 0.0    | 0.0    | 0.0    | 0.0     | 0.0      | 0.0    | 0.1    | 0.0    | 0.0    | 0.0     |            |     |  |  |  |  |  |  |  |  |  |  |            |  |  |  |  |  |  |  |  |  |  |  |
| Haemophilus      | 0.0        | 0.0    | 0.0    | 0.0    | 0.0    | 0.0     | 0.0      | 0.0    | 0.0    | 0.0    | 0.0    | 0.0     | 0.0        | 0.0    | 0.0    | 0.0    | 0.0    | 0.0     | 0.0      | 0.0    | 0.0    | 0.0    | 0.0    | 0.0     | 0.0        | 0.0    | 0.0    | 0.0    | 0.0    | 0.0     | 0.0      | 0.0    | 0.0    | 0.0    | 0.0    | 0.0     |            |     |  |  |  |  |  |  |  |  |  |  |            |  |  |  |  |  |  |  |  |  |  |  |
| Paracoccus       | 0.0        | 0.0    | 0.2    | 0.0    | 0.0    | 0.0     | 0.1      | 0.0    | 0.0    | 0.0    | 0.0    | 0.0     | 0.0        | 0.0    | 0.0    | 0.0    | 0.0    | 0.0     | 0.0      | 0.0    | 0.0    | 0.0    | 0.0    | 0.0     | 0.0        | 0.0    | 0.0    | 0.0    | 0.0    | 0.0     | 0.0      | 0.0    | 0.0    | 0.0    | 0.0    | 0.0     |            |     |  |  |  |  |  |  |  |  |  |  |            |  |  |  |  |  |  |  |  |  |  |  |
| Lawsonella       | 0.0        | 1.6    | 0.2    | 0.2    | 0.2    | 0.9     | 0.1      | 0.6    | 1.7    | 0.3    | 0.0    | 0.5     | 0.6        | 0.0    | 0.0    | 0.0    | 0.1    | 0.1     | 0.1      | 0.0    | 0.0    | 0.0    | 0.0    | 0.1     | 0.0        | 0.0    | 0.0    | 0.0    | 0.0    | 0.0     | 0.0      | 0.0    | 0.0    | 0.0    | 0.0    | 0.0     |            |     |  |  |  |  |  |  |  |  |  |  |            |  |  |  |  |  |  |  |  |  |  |  |
| Brucella         | 0.2        | 3.5    | 0.3    | 3.5    | 0.0    | 0.0     | 0.0      | 0.0    | 0.0    | 1.5    | 1.5    | 1.1     | 0.3        | 0.0    | 0.0    | 0.0    | 0.0    | 0.1     | 1.1      | 0.0    | 0.0    | 0.0    | 0.0    | 0.0     | 0.0        | 0.0    | 0.0    | 0.0    | 0.0    | 0.0     | 0.0      | 0.0    | 0.0    | 0.0    | 0.0    | 0.0     |            |     |  |  |  |  |  |  |  |  |  |  |            |  |  |  |  |  |  |  |  |  |  |  |
| Mycobacterium    | 0.1        | 0.0    | 2.8    | 0.4    | 0.0    | 0.0     | 0.1      | 0.1    | 0.0    | 0.0    | 0.0    | 0.0     | 0.0        | 0.0    | 0.0    | 0.0    | 0.0    | 0.2     | 0.1      | 0.0    | 0.0    | 0.0    | 0.0    | 0.0     | 0.0        | 0.0    | 0.0    | 0.0    | 0.0    | 0.0     | 0.0      | 0.0    | 0.0    | 0.0    | 0.0    | 0.0     |            |     |  |  |  |  |  |  |  |  |  |  |            |  |  |  |  |  |  |  |  |  |  |  |
| Verrucom         | 0.0        | 0.4    | 0.5    | 0.5    | 1.1    | 0.0     | 0.7      | 1.7    | 0.0    | 0.0    | 0.0    | 0.0     | 0.0        | 0.0    | 0.0    | 0.0    | 0.1    | 2.8     | 0.1      | 0.2    | 1.2    | 0.0    | 0.1    | 0.1     | 0.6        | 0.0    | 0.0    | 0.0    | 0.0    | 0.0     | 0.0      | 0.0    | 0.0    | 0.0    | 0.0    | 0.0     |            |     |  |  |  |  |  |  |  |  |  |  |            |  |  |  |  |  |  |  |  |  |  |  |
| Veillonella      | 0.1        | 0.1    | 0.7    | 0.3    | 0.0    | 0.0     | 0.0      | 0.0    | 0.0    | 0.0    | 0.0    | 0.0     | 0.0        | 0.0    | 0.0    | 0.0    | 0.0    | 0.0     | 0.0      | 0.0    | 0.0    | 0.0    | 0.0    | 0.0     | 0.0        | 0.0    | 0.0    | 0.0    | 0.0    | 0.0     | 0.0      | 0.0    | 0.0    | 0.0    | 0.0    | 0.0     |            |     |  |  |  |  |  |  |  |  |  |  |            |  |  |  |  |  |  |  |  |  |  |  |
| Sphingomonas     | 0.0        | 0.0    | 0.8    | 0.0    | 0.0    | 0.0     | 0.0      | 0.0    | 0.0    | 0.0    | 0.0    | 0.0     | 0.0        | 0.0    | 0.0    | 0.0    | 0.0    | 0.8     | 0.2      | 0.1    | 0.0    | 0.1    | 0.1    | 0.6     | 0.0        | 0.0    | 0.0    | 0.0    | 0.0    | 0.0     | 0.0      | 0.0    | 0.0    | 0.0    | 0.0    | 0.0     |            |     |  |  |  |  |  |  |  |  |  |  |            |  |  |  |  |  |  |  |  |  |  |  |
| Williamsia       | 0.0        | 0.0    | 0.0    | 0.0    | 0.0    | 0.0     | 0.0      | 0.0    | 0.0    | 0.0    | 0.0    | 0.0     | 0.0        | 0.0    | 0.0    | 0.0    | 0.0    | 0.0     | 0.0      | 0.0    | 0.0    | 0.0    | 0.0    | 0.0     | 0.0        | 0.0    | 0.0    | 0.0    | 0.0    | 0.0     | 0.0      | 0.0    | 0.0    | 0.0    | 0.0    | 0.0     |            |     |  |  |  |  |  |  |  |  |  |  |            |  |  |  |  |  |  |  |  |  |  |  |
| Penitiphilum     | 0.0        | 0.0    | 0.0    | 0.4    | 1.0    | 0.8     | 0.8      | 0.0    | 0.3    | 0.0    | 0.2    | 1.8     | 1.5        | 4.2    | 0.0    | 0.0    | 0.2    | 0.1     | 0.2      | 0.1    | 0.0    | 0.0    | 0.0    | 0.0     | 0.0        | 0.0    | 0.0    | 0.0    | 0.0    | 0.0     | 0.0      | 0.0    | 0.0    | 0.0    | 0.0    | 0.0     |            |     |  |  |  |  |  |  |  |  |  |  |            |  |  |  |  |  |  |  |  |  |  |  |
| Chlorobacterium  | 0.0        | 0.3    | 0.2    | 0.1    | 0.2    | 0.1     | 0.4      | 0.2    | 0.1    | 0.2    | 0.1    | 0.3     | 0.2        | 0.1    | 0.3    | 0.0    | 0.0    | 0.3     | 0.2      | 0.3    | 0.2    | 0.0    | 0.0    | 0.0     | 0.0        | 0.0    | 0.0    | 0.0    | 0.0    | 0.0     | 0.0      | 0.0    | 0.0    | 0.0    | 0.0    | 0.0     |            |     |  |  |  |  |  |  |  |  |  |  |            |  |  |  |  |  |  |  |  |  |  |  |
| Escherichia      | 0.0        | 0.0    | 0.0    | 0.0    | 0.0    | 0.0     | 0.0      | 0.0    | 0.0    | 0.0    | 0.0    | 0.0     | 0.0        | 0.0    | 0.0    | 0.0    | 0.0    | 0.0     | 0.0      | 0.0    | 0.0    | 0.0    | 0.0    | 0.0     | 0.0        | 0.0    | 0.0    | 0.0    | 0.0    | 0.0     | 0.0      | 0.0    | 0.0    | 0.0    | 0.0    | 0.0     |            |     |  |  |  |  |  |  |  |  |  |  |            |  |  |  |  |  |  |  |  |  |  |  |
| Stenotrophomonas | 0.0        | 0.0    | 0.0    | 0.0    | 0.0    | 0.0     | 0.0      | 0.0    | 0.0    | 0.0    | 0.0    | 0.0     | 0.0        | 0.0    | 0.0    | 0.0    | 0.0    | 0.0     | 0.0      | 0.0    | 0.0    | 0.0    | 0.0    | 0.0     | 0.0        | 0.0    | 0.0    | 0.0    | 0.0    | 0.0     | 0.0      | 0.0    | 0.0    | 0.0    | 0.0    | 0.0     |            |     |  |  |  |  |  |  |  |  |  |  |            |  |  |  |  |  |  |  |  |  |  |  |
| Monococcus       | 0.0        | 0.1    | 0.1    | 0.0    | 0.0    | 0.0     | 0.0      | 0.0    | 0.0    | 0.0    | 0.0    | 0.0     | 0.0        | 0.0    | 0.0    | 0.0    | 0.0    | 0.3     | 0.0      | 0.0    | 0.0    | 0.0    | 0.0    | 0.0     | 0.0        | 0.0    | 0.0    | 0.0    | 0.0    | 0.0     | 0.0      | 0.0    | 0.0    | 0.0    | 0.0    | 0.0     |            |     |  |  |  |  |  |  |  |  |  |  |            |  |  |  |  |  |  |  |  |  |  |  |
| Serratia         | 0.0        | 0.0    | 0.0    | 0.0    | 0.0    | 0.0     | 0.1      | 0.0    | 0.0    | 0.0    | 0.0    | 0.0     | 0.0        | 0.0    | 0.0    | 0.0    | 0.0    | 0.0     | 0.0      | 0.0    | 0.0    | 0.0    | 0.0    | 0.0     | 0.0        | 0.0    | 0.0    | 0.0    | 0.0    | 0.0     | 0.0      | 0.0    | 0.0    | 0.0    | 0.0    | 0.0     |            |     |  |  |  |  |  |  |  |  |  |  |            |  |  |  |  |  |  |  |  |  |  |  |
| Pseudomonas      | 0.0        | 0.0    | 0.1    | 0.0    | 0.0    | 0.0     | 0.1      | 0.0    | 0.0    | 0.0    | 0.0    | 0.0     | 0.0        | 0.0    | 0.0    | 0.0    | 0.1    | 0.5     | 1.0      | 0.2    | 0.0    | 0.0    | 0.0    | 0.0     | 0.0        | 0.0    | 0.0    | 0.0    | 0.0    | 0.0     | 0.0      | 0.0    | 0.0    | 0.0    | 0.0    | 0.0     |            |     |  |  |  |  |  |  |  |  |  |  |            |  |  |  |  |  |  |  |  |  |  |  |
| Gemella          | 0.0        | 0.1    | 0.0    | 0.0    | 0.4    | 0.0     | 0.2      | 0.0    | 0.0    | 0.0    | 0.0    | 0.0     | 0.0        | 0.0    | 0.0    | 0.0    | 0.0    | 0.0     | 0.1      | 0.0    | 0.0    | 0.0    | 0.1    | 0.0     | 0.0        | 0.0    | 0.0    | 0.0    | 0.0    | 0.0     | 0.0      | 0.0    | 0.0    | 0.0    | 0.0    | 0.0     |            |     |  |  |  |  |  |  |  |  |  |  |            |  |  |  |  |  |  |  |  |  |  |  |
| Psychrobacter    | 0.0        | 0.0    | 0.0    | 0.0    | 0.0    | 0.0     | 0.0      | 0.0    | 0.0    | 0.0    | 0.0    | 0.0     | 0.0        | 0.0    | 0.0    | 0.0    | 0.0    | 0.0     | 0.0      | 0.0    | 0.0    | 0.0    | 0.0    | 0.0     | 0.0        | 0.0    | 0.0    | 0.0    | 0.0    | 0.0     | 0.0      | 0.0    | 0.0    | 0.0    | 0.0    | 0.0     |            |     |  |  |  |  |  |  |  |  |  |  |            |  |  |  |  |  |  |  |  |  |  |  |
| Adaptophila      | 0.0        | 0.0    | 0.0    | 0.0    | 0.0    | 0.0     | 0.0      | 0.0    | 0.0    | 0.0    | 0.0    | 0.0     | 0.0        | 0.0    | 0.0    | 0.0    | 0.0    | 0.0     | 0.0      | 0.0    | 0.0    | 0.0    | 0.0    | 0.0     | 0.0        | 0.0    | 0.0    | 0.0    | 0.0    | 0.0     | 0.0      | 0.0    | 0.0    | 0.0    | 0.0    | 0.0     |            |     |  |  |  |  |  |  |  |  |  |  |            |  |  |  |  |  |  |  |  |  |  |  |
| Mycobacterium    | 0.1        | 0.1    | 0.1    | 0.1    | 0.1    | 0.1     | 0.1      | 0.1    | 0.1    | 0.1    | 0.1    | 0.1     | 0.7        | 0.6    | 0.0    | 0.0    | 0.0    | 0.1     | 0.0      | 0.0    | 0.0    | 0.0    | 0.0    | 0.5     | 0.1        | 0.0    | 0.0    | 0.0    | 0.0    | 0.0     | 0.0      | 0.0    | 0.0    | 0.0    | 0.0    | 0.0     | 0.0        |     |  |  |  |  |  |  |  |  |  |  |            |  |  |  |  |  |  |  |  |  |  |  |
| Enterobacter     | 0.1        | 0.1    | 0.1    | 0.1    | 0.1    | 0.1     | 0.4      | 0.0    | 0.1    | 0.0    | 0.0    | 0.1     | 0.2        | 0.1    | 0.0    | 0.0    | 0.0    | 0.1     | 0.2      | 0.2    | 0.0    | 0.0    | 0.0    | 0.0     | 0.0        | 0.0    | 0.0    | 0.0    | 0.0    | 0.0     | 0.0      | 0.0    | 0.0    | 0.0    | 0.0    | 0.0     |            |     |  |  |  |  |  |  |  |  |  |  |            |  |  |  |  |  |  |  |  |  |  |  |
| Acetivibrio      | 0.1        | 0.0    | 0.3    | 0.3    | 0.0    | 0.1     | 0.0      | 0.0    | 0.0    | 0.0    | 0.0    | 0.0     | 0.0        | 0.0    | 0.0    | 0.0    | 0.3    | 0.0     | 0.8      | 0.0    | 0.0    | 0.0    | 0.0    | 0.0     | 0.0        | 0.0    | 0.0    | 0.0    | 0.0    | 0.0     | 0.0      | 0.0    | 0.0    | 0.0    | 0.0    | 0.0     |            |     |  |  |  |  |  |  |  |  |  |  |            |  |  |  |  |  |  |  |  |  |  |  |
| Mastella         | 0.0        | 0.0    | 0.9    | 0.8    | 0.0    | 0.0     | 0.0      | 0.0    | 0.0    | 0.0    | 0.0    | 0.0     | 0.0        | 0.0    | 0.0    | 0.0    | 0.0    | 0.0     | 0.3      | 0.0    | 0.0    | 0.0    | 0.0    | 0.0     | 0.0        | 0.0    | 0.0    | 0.0    | 0.0    | 0.0     | 0.0      | 0.0    | 0.0    | 0.0    | 0.0    | 0.0     |            |     |  |  |  |  |  |  |  |  |  |  |            |  |  |  |  |  |  |  |  |  |  |  |
| Brevundimonas    | 0.0        | 0.0    | 0.0    | 0.3    | 0.0    | 0.0     | 0.3      | 0.0    | 0.4    | 0.0    | 0.0    | 0.0     | 0.1        | 0.0    | 0.0    | 0.0    | 0.0    | 0.0     | 0.0      | 0.1    | 0.0    | 0.0    | 0.0    | 0.0     | 1.5        | 0.0    | 0.0    | 0.0    | 0.0    | 0.0     | 0.0      | 0.0    | 0.0    | 0.0    | 0.0    | 0.0     |            |     |  |  |  |  |  |  |  |  |  |  |            |  |  |  |  |  |  |  |  |  |  |  |
| Micromonospora   | 0.0        | 0.0    | 0.0    | 0.0    | 0.0    | 0.0     | 0.0      | 0.0    | 0.0    | 0.0    | 0.0    | 0.0     | 0.0        | 0.0    | 0.0    | 0.0    | 0.0    | 0.0     | 0.1      | 0.0    | 0.0    | 0.0    | 0.0    | 0.0     | 0.0        | 0.0    | 0.0    | 0.0    | 0.0    | 0.0     | 0.0      | 0.0    | 0.0    | 0.0    | 0.0    | 0.0     |            |     |  |  |  |  |  |  |  |  |  |  |            |  |  |  |  |  |  |  |  |  |  |  |
| Kingella         | 0.0        | 0.0    | 0.0    | 0.0    | 0.0    | 0.0     | 0.0      | 0.0    | 0.0    | 0.0    | 0.0    | 0.0     | 0.1        | 0.6    | 2.7    | 0.0    | 0.1    | 0.0     | 0.2      |        |        |        |        |         |            |        |        |        |        |         |          |        |        |        |        |         |            |     |  |  |  |  |  |  |  |  |  |  |            |  |  |  |  |  |  |  |  |  |  |  |

| Taxa               | Subject 23 |        |        |        | Subject 24 |        |        |        | Subject 25 |        |        |        | Subject 26 |        |        |        | Subject 27 |        |        |        |      |      |      |      |      |     |
|--------------------|------------|--------|--------|--------|------------|--------|--------|--------|------------|--------|--------|--------|------------|--------|--------|--------|------------|--------|--------|--------|------|------|------|------|------|-----|
|                    | Baseline   | Week 2 | Week 4 | Week 8 | Baseline   | Week 2 | Week 4 | Week 8 | Baseline   | Week 2 | Week 4 | Week 8 | Baseline   | Week 2 | Week 4 | Week 8 | Baseline   | Week 2 | Week 4 | Week 8 |      |      |      |      |      |     |
| Colibacterium      | 16.0       | 4.8    | 12.4   | 19.2   | 62.8       | 27.8   | 29.9   | 27.0   | 49.3       | 47.6   | 17.3   | 29.8   | 32.8       | 36.2   | 32.2   | 3.5    | 2.1        | 2.9    | 8.7    | 8.8    | 14.2 | 13.5 | 7.9  | 11.8 | 27.7 |     |
| Corynebacterium    | 22.0       | 22.2   | 26.7   | 22.0   | 53.0       | 30.2   | 30.2   | 20.0   | 21.0       | 15.0   | 22.0   | 22.0   | 21.0       | 12.6   | 8.1    | 8.1    | 8.1        | 9.0    | 4.8    | 26.0   | 26.0 | 21.5 | 6.1  | 4.0  | 0.1  |     |
| Corynebacterium    | 10.8       | 16.9   | 28.4   | 19.3   | 9.6        | 2.5    | 3.5    | 12.0   | 4.0        | 3.3    | 14.8   | 12.0   | 11.8       | 8.5    | 21.1   | 4.8    | 2.2        | 4.8    | 8.8    | 0.9    | 16.7 | 21.6 | 17.3 | 1.9  | 14.0 |     |
| Streptococcus      | 13.3       | 13.7   | 14.2   | 1.7    | 5.0        | 8.3    | 10.7   | 7.0    | 6.7        | 11.8   | 4.4    | 4.2    | 4.2        | 7.6    | 11.5   | 49.7   | 26.9       | 32.1   | 48.9   | 18.2   | 12.2 | 8.6  | 19.9 | 23.5 | 23.1 |     |
| Streptococcus      | 0.0        | 0.0    | 0.0    | 0.2    | 0.2        | 0.0    | 0.0    | 0.0    | 0.0        | 0.0    | 0.0    | 0.0    | 0.0        | 0.0    | 0.0    | 0.1    | 0.1        | 0.1    | 0.1    | 0.0    | 0.0  | 0.0  | 0.0  | 0.0  | 0.0  |     |
| Moraxella          | 4.7        | 4.8    | 0.8    | 0.2    | 0.6        | 0.1    | 0.0    | 3.4    | 2.2        | 5.0    | 12.8   | 11.2   | 5.7        | 2.8    | 1.8    | 0.8    | 0.8        | 2.3    | 0.1    | 0.1    | 3.2  | 8.2  | 8.6  | 1.6  | 4.6  | 9.6 |
| Finnefella         | 1.1        | 0.6    | 0.3    | 0.9    | 1.2        | 0.0    | 0.0    | 0.5    | 1.5        | 0.6    | 1.3    | 1.0    | 1.5        | 9.1    | 1.4    | 0.1    | 0.1        | 0.1    | 0.3    | 1.9    | 0.4  | 0.0  | 0.3  | 0.2  | 0.0  | 0.0 |
| Aerobacter         | 0.0        | 0.6    | 0.0    | 0.0    | 0.0        | 0.8    | 2.8    | 2.4    | 0.8        | 0.3    | 0.1    | 0.1    | 0.5        | 0.0    | 0.0    | 0.0    | 0.3        | 0.2    | 0.0    | 0.0    | 0.0  | 0.2  | 0.0  | 0.0  | 0.0  |     |
| Denitococcus       | 0.0        | 0.0    | 0.0    | 0.0    | 0.0        | 0.0    | 0.0    | 1.0    | 0.0        | 0.0    | 0.0    | 0.0    | 0.0        | 0.0    | 0.0    | 0.0    | 0.0        | 0.0    | 0.0    | 0.0    | 0.0  | 0.0  | 0.0  | 0.1  | 0.1  |     |
| Roseomonas         | 0.0        | 0.3    | 0.1    | 1.2    | 1.6        | 0.0    | 0.0    | 0.0    | 0.0        | 0.0    | 0.8    | 0.0    | 0.0        | 0.0    | 0.0    | 0.0    | 0.0        | 0.2    | 0.0    | 0.5    | 0.0  | 0.1  | 0.1  | 0.0  | 0.0  |     |
| Neseria            | 0.0        | 0.0    | 0.3    | 0.1    | 0.0        | 0.0    | 0.0    | 0.0    | 0.0        | 0.0    | 0.1    | 0.0    | 0.1        | 0.0    | 0.1    | 0.0    | 0.7        | 2.4    | 0.1    | 3.1    | 0.0  | 1.4  | 3.1  | 2.1  | 1.5  |     |
| Riftia             | 1.5        | 1.3    | 1.5    | 0.0    | 0.0        | 0.1    | 2.7    | 1.5    | 1.2        | 1.5    | 0.0    | 0.0    | 0.5        | 5.8    | 4.7    | 15.9   | 7.5        | 19.9   | 3.2    | 1.7    | 3.7  | 2.7  | 1.5  | 3.4  | 3.4  |     |
| Pnevetella         | 0.0        | 0.3    | 0.0    | 0.0    | 1.1        | 0.0    | 0.0    | 2.2    | 0.0        | 0.1    | 0.1    | 0.5    | 0.2        | 0.5    | 0.7    | 10.1   | 2.1        | 1.7    | 0.6    | 2.0    | 0.1  | 0.8  | 1.2  | 0.5  | 0.1  |     |
| Anaerococcus       | 0.1        | 0.2    | 0.4    | 0.2    | 0.3        | 0.2    | 2.0    | 1.2    | 1.1        | 0.5    | 1.0    | 2.4    | 1.1        | 1.5    | 10.0   | 0.0    | 0.0        | 0.0    | 0.6    | 0.9    | 0.4  | 0.2  | 0.4  | 0.0  | 0.0  |     |
| Kocuria            | 0.0        | 0.3    | 0.6    | 0.1    | 0.0        | 0.1    | 0.0    | 0.2    | 0.3        | 1.2    | 0.0    | 0.1    | 0.0        | 0.1    | 0.1    | 0.0    | 0.9        | 2.0    | 0.2    | 2.2    | 0.0  | 0.6  | 0.5  | 2.1  | 0.4  |     |
| Haemophilus        | 0.0        | 0.0    | 0.0    | 0.0    | 0.0        | 0.0    | 0.0    | 0.0    | 0.5        | 0.5    | 0.0    | 0.0    | 0.0        | 0.0    | 0.0    | 2.0    | 0.0        | 0.0    | 0.0    | 0.0    | 0.1  | 3.4  | 8.0  | 1.2  | 0.0  |     |
| Paracoccus         | 0.0        | 0.3    | 0.3    | 0.0    | 0.0        | 0.0    | 0.4    | 0.0    | 0.1        | 3.7    | 0.0    | 0.0    | 0.0        | 0.0    | 0.0    | 0.0    | 0.0        | 0.3    | 0.0    | 0.0    | 0.0  | 1.8  | 0.1  | 0.1  | 0.0  |     |
| Lawsonella         | 0.0        | 0.0    | 0.0    | 0.3    | 0.0        | 0.0    | 0.0    | 0.5    | 0.9        | 0.4    | 0.0    | 0.2    | 0.2        | 1.3    | 0.4    | 0.1    | 0.0        | 0.1    | 0.7    | 0.6    | 0.0  | 0.8  | 0.5  | 0.0  | 1.6  |     |
| Haemophilus        | 0.4        | 0.7    | 0.1    | 0.4    | 0.0        | 0.4    | 0.8    | 0.7    | 0.4        | 0.2    | 0.1    | 0.4    | 0.4        | 0.4    | 0.4    | 0.1    | 0.6        | 0.6    | 0.2    | 0.2    | 0.0  | 0.1  | 0.0  | 0.0  | 0.0  |     |
| Methylobacterium   | 0.2        | 0.6    | 0.7    | 3.1    | 0.4        | 0.0    | 0.0    | 0.0    | 0.2        | 0.0    | 0.1    | 0.1    | 0.1        | 0.0    | 0.0    | 0.0    | 0.0        | 0.0    | 0.2    | 0.2    | 0.0  | 0.1  | 0.0  | 0.0  | 0.0  |     |
| Vesillonella       | 0.0        | 0.0    | 0.0    | 0.0    | 0.0        | 0.0    | 0.0    | 0.0    | 0.2        | 0.1    | 0.0    | 1.5    | 0.2        | 0.9    | 0.1    | 0.2    | 2.9        | 2.8    | 0.3    | 4.0    | 0.0  | 0.4  | 0.7  | 4.0  | 2.7  |     |
| Staphylococcus     | 0.0        | 1.2    | 0.0    | 0.0    | 0.0        | 0.0    | 0.0    | 0.0    | 0.0        | 0.0    | 0.0    | 0.0    | 0.0        | 2.9    | 0.0    | 0.0    | 2.9        | 2.4    | 2.3    | 2.3    | 0.1  | 1.7  | 6.0  | 1.2  | 0.0  |     |
| Sphingomonas       | 0.1        | 0.3    | 0.7    | 0.6    | 1.0        | 0.1    | 0.6    | 1.7    | 0.0        | 0.0    | 0.0    | 1.0    | 0.4        | 0.0    | 0.0    | 0.0    | 0.0        | 0.5    | 0.0    | 0.4    | 0.4  | 0.5  | 0.2  | 0.3  | 0.0  |     |
| Williamsia         | 0.0        | 0.0    | 0.0    | 0.0    | 0.0        | 0.0    | 0.0    | 0.0    | 0.0        | 0.0    | 0.0    | 0.0    | 0.0        | 0.0    | 0.0    | 0.0    | 0.0        | 0.4    | 0.5    | 0.5    | 0.0  | 0.1  | 0.4  | 0.0  | 0.0  |     |
| Penitophthium      | 0.0        | 0.0    | 0.0    | 0.0    | 0.7        | 0.0    | 0.0    | 0.4    | 0.3        | 0.2    | 0.2    | 0.6    | 0.8        | 2.4    | 1.1    | 0.0    | 0.0        | 0.4    | 0.6    | 0.1    | 0.0  | 0.2  | 0.1  | 0.0  | 0.0  |     |
| Penitophthium      | 0.1        | 0.1    | 0.1    | 0.1    | 0.0        | 0.2    | 0.1    | 0.2    | 0.5        | 0.0    | 0.2    | 0.1    | 0.1        | 0.2    | 0.1    | 0.1    | 0.1        | 0.1    | 0.3    | 0.3    | 0.0  | 0.2  | 0.0  | 0.0  | 0.0  |     |
| Escherichia        | 0.0        | 0.0    | 0.0    | 0.0    | 0.0        | 0.0    | 0.0    | 0.5    | 0.0        | 0.0    | 0.0    | 0.0    | 0.0        | 0.0    | 0.0    | 0.0    | 0.0        | 0.0    | 0.0    | 0.0    | 0.0  | 0.0  | 0.0  | 0.0  | 0.0  |     |
| Stermanella        | 0.0        | 0.0    | 0.3    | 1.1    | 0.0        | 0.0    | 0.0    | 0.0    | 0.0        | 0.0    | 0.0    | 0.1    | 0.1        | 0.0    | 0.0    | 0.0    | 0.0        | 0.0    | 0.0    | 0.0    | 0.0  | 0.0  | 0.0  | 0.0  | 0.0  |     |
| Monococcus         | 0.0        | 1.2    | 0.6    | 0.0    | 0.0        | 0.6    | 0.5    | 0.3    | 0.5        | 0.0    | 0.0    | 0.0    | 0.0        | 0.0    | 0.0    | 0.0    | 0.0        | 0.0    | 0.0    | 0.0    | 0.0  | 0.0  | 0.0  | 0.0  | 0.0  |     |
| Serratia           | 0.0        | 0.0    | 0.1    | 1.3    | 0.0        | 0.0    | 0.0    | 0.0    | 0.4        | 0.4    | 0.0    | 0.0    | 0.0        | 0.1    | 0.1    | 0.0    | 0.0        | 0.0    | 0.8    | 0.0    | 0.0  | 0.2  | 0.7  | 0.0  | 4.0  |     |
| Pseudomonas        | 0.7        | 1.0    | 3.4    | 2.0    | 0.0        | 0.1    | 0.1    | 0.0    | 0.0        | 0.0    | 0.0    | 0.3    | 0.0        | 0.0    | 0.1    | 0.0    | 1.2        | 0.0    | 0.0    | 0.0    | 0.0  | 0.0  | 0.0  | 0.0  | 0.0  |     |
| Gemella            | 0.0        | 0.0    | 0.0    | 0.0    | 0.0        | 0.0    | 0.0    | 0.1    | 0.1        | 0.0    | 0.0    | 0.0    | 0.0        | 0.3    | 0.2    | 1.1    | 2.1        | 1.5    | 0.1    | 2.9    | 0.4  | 1.1  | 2.6  | 0.6  | 1.4  |     |
| Pythiummonas       | 0.0        | 0.0    | 0.0    | 0.0    | 0.0        | 0.0    | 0.0    | 0.0    | 0.0        | 0.0    | 0.0    | 0.0    | 0.0        | 0.3    | 0.3    | 5.3    | 1.9        | 2.6    | 0.8    | 0.3    | 0.0  | 0.6  | 0.0  | 0.0  | 0.0  |     |
| Adaptophila        | 0.0        | 0.0    | 0.0    | 0.0    | 0.0        | 0.0    | 0.0    | 0.0    | 0.0        | 0.0    | 0.0    | 0.0    | 0.0        | 0.0    | 0.0    | 0.0    | 4.8        | 0.6    | 0.0    | 12.9   | 0.0  | 0.1  | 0.3  | 0.0  | 0.1  |     |
| Mycobacterium      | 0.0        | 1.8    | 0.0    | 0.1    | 0.0        | 0.1    | 0.1    | 0.1    | 0.1        | 0.0    | 0.0    | 0.1    | 0.1        | 0.1    | 0.1    | 0.1    | 1.9        | 1.2    | 1.2    | 0.8    | 0.1  | 0.2  | 0.0  | 0.1  | 0.0  |     |
| Enterobacter       | 0.0        | 0.4    | 0.0    | 0.0    | 0.2        | 0.2    | 0.2    | 0.4    | 0.2        | 0.0    | 0.0    | 0.1    | 0.1        | 0.2    | 0.2    | 0.2    | 2.4        | 0.4    | 0.1    | 0.4    | 0.0  | 0.3  | 1.2  | 0.1  | 0.1  |     |
| Actinomyces        | 0.0        | 0.0    | 0.0    | 0.3    | 0.0        | 0.0    | 0.3    | 0.2    | 0.0        | 0.1    | 0.1    | 0.1    | 0.1        | 0.1    | 0.1    | 0.1    | 0.0        | 0.0    | 0.0    | 0.0    | 0.0  | 0.0  | 0.0  | 0.0  | 0.0  |     |
| Mastella           | 0.0        | 0.0    | 0.3    | 0.0    | 0.0        | 0.0    | 0.0    | 0.0    | 0.0        | 0.0    | 0.0    | 2.0    | 2.5        | 4.8    | 0.7    | 0.4    | 0.0        | 0.0    | 0.0    | 0.0    | 0.0  | 0.1  | 0.0  | 0.0  | 0.0  |     |
| Brevundimonas      | 0.0        | 0.1    | 0.0    | 0.0    | 0.0        | 0.0    | 0.0    | 0.0    | 0.0        | 0.0    | 0.0    | 0.3    | 0.0        | 0.0    | 0.0    | 0.0    | 0.0        | 0.0    | 0.0    | 0.3    | 0.0  | 0.4  | 0.1  | 0.9  | 0.2  |     |
| Moraxella          | 0.4        | 0.6    | 0.6    | 0.0    | 0.0        | 0.0    | 0.0    | 0.0    | 0.0        | 0.0    | 0.0    | 0.6    | 0.1        | 0.0    | 0.0    | 0.1    | 0.0        | 0.1    | 0.6    | 0.1    | 0.0  | 0.2  | 0.0  | 0.0  | 0.0  |     |
| Kingella           | 0.0        | 0.0    | 0.0    | 0.0    | 0.0        | 0.0    | 0.0    | 0.0    | 0.0        | 0.0    | 0.0    | 0.2    | 0.1        | 0.0    | 0.0    | 0.0    | 0.1        | 0.0    | 0.0    | 0.0    | 0.0  | 0.0  | 0.0  | 0.0  | 0.0  |     |
| Dermostococcus     | 0.0        | 0.0    | 0.0    | 0.0    | 0.0        | 0.0    | 0.0    | 0.0    | 0.2        | 0.0    | 0.0    | 0.0    | 0.1        | 0.0    | 0.0    | 0.0    | 0.1        | 1.1    | 0.2    | 0.5    | 0.1  | 0.5  | 0.1  | 0.1  | 0.1  |     |
| Leptothrix         | 0.1        | 0.0    | 0.0    | 0.0    | 0.0        | 0.0    | 0.0    | 0.0    | 0.1        | 0.0    | 0.0    | 0.5    | 1.7        | 0.4    | 0.1    | 0.5    | 1.7        | 0.4    | 0.0    | 1.5    | 0.0  | 0.2  | 0.0  | 0.0  | 0.0  |     |
| Flavobacterium     | 0.0        | 0.0    | 0.0    | 0.0    | 0.0        | 0.0    | 0.0    | 0.1    | 0.0        | 0.0    | 0.1    | 0.3    | 0.1        | 0.1    | 0.8    | 3.2    | 0.9        | 0.1    | 1.8    | 0.0    | 0.1  | 0.5  | 0.2  | 0.1  | 0.1  |     |
| Eikenella          | 0.0        | 0.0    | 0.0    | 0.0    | 0.0        | 0.0    | 0.0    | 0.0    | 0.0        | 0.0    | 0.0    | 0.0    | 0.0        | 0.0    | 0.0    | 0.0    | 0.2        | 0.1    | 0.0    | 0.0    | 0.0  | 0.0  | 0.1  | 0.0  | 0.0  |     |
| Mycobacterium      | 0.0        | 0.4    | 0.1    | 0.1    | 0.0        | 0.0    | 0.1    | 0.1    | 0.1        | 0.0    | 0.0    | 0.1    | 0.1        | 0.0    | 0.0    | 0.0    | 0.0        | 0.0    | 0.0    | 0.0    | 0.0  | 0.1  | 0.1  | 0.0  | 0.1  |     |
| Gordonia           | 0.0        | 0.1    | 0.0    | 0.0    | 0.0        | 0.0    | 0.4    | 0.0    | 0.0        | 0.0    | 0.0    | 0.1    | 0.0        | 0.0    | 0.0    | 0.0    | 0.0        | 0.0    | 0.0    | 0.0    | 0.0  | 0.1  | 0.0  | 0.0  | 0.1  |     |
| Tessaracoccus      | 0.0        | 0.0    | 0.0    | 0.4    | 0.0        | 0.1    | 0.1    | 0.1    | 0.1        | 0.1    | 0.0    | 0.2    | 0.3        | 0.2    | 0.1    | 0.0    | 0.0        | 0.0    | 0.0    | 0.1    | 0.0  | 0.1  | 0.0  | 0.1  | 0.0  |     |
| Rhodococcus        | 0.0        | 0.0    | 0.1    | 0.1    | 0.1        | 0.0    | 0.1    | 0.9    | 0.1        | 0.1    | 0.0    | 0.1    | 0.0        | 0.1    | 0.1    | 0.0    | 0.0        | 0.1    | 0.0    | 0.0    | 0.0  | 0.1  | 0.3  | 0.0  | 0.1  |     |
| Methylobacter      | 0.0        | 0.1    | 0.0    | 0.0    | 0.0        | 0.1    | 0.1    | 0.1    | 0.1        | 0.0    | 0.0    | 0.0    | 0.0        | 0.0    | 0.0    | 0.0    | 0.0        | 0.0    | 0.0    | 0.0    | 0.0  | 0.0  | 0.0  | 0.0  | 0.0  |     |
| Pnevetellamassalia | 0.0        | 0.0    | 0.0    | 0.0    | 0.0        | 0.0    | 0.0    | 0.0    | 0.0        | 0.0    | 0.0    | 0.0    | 0.0        | 0.0    | 0.0    | 0.0    | 0.5        | 4.2    | 0.0    | 0.3    | 0.0  | 0.0  | 0.0  | 0.0  | 0.0  |     |
| Povallibacter      | 0.0        | 0.0    | 0.3    | 0.0    | 0.0        | 0.7    | 0.7    | 0.3    | 0.2        | 0.1    | 0.0    | 0.2    | 0.6        | 0.4    | 0.1    | 0.0    | 0.0        | 0.0    | 0.0    | 0.1    | 0.1  | 0.0  | 0.2  | 0.0  | 0.0  |     |
| Lentilopsis        | 0.28       | 0.4    | 0.2    | 0.2    | 0.0        | 0.0    | 0.0    | 0.0    | 0.0        | 0.1    | 0.0    | 0.1    | 0.1        | 0.0    | 0.0    | 0.0    | 0.0        | 0.0    | 0.0    | 0.0    | 0.0  | 0.0  | 0.0  | 0.0  | 0.0  |     |
| Micodactylum       | 0.0        | 0.0    | 0.0    | 0.0    | 0.2        | 1.2    | 0.2    | 0.7    | 0.0        | 0.0    | 0.0    | 0.0    | 0.0        | 0.0    | 0.2    | 0.0    | 0.0        | 0.0    | 0.0    | 0.0    | 0.0  | 0.0  | 0.0  | 0.1  | 0.0  |     |
| Methylobacterium   | 0.2        | 0.2    | 0.0    | 0.0    | 0.0        | 0.2    | 0.2    | 0.0    | 0.0        | 0.0    | 0.0    | 0.0    | 0.0        | 0.0    | 0.0    | 0.0    | 0.0        | 0.0    | 0.0    | 0.1    | 0.0  | 0.0  | 0.0  | 0.0  | 0.0  |     |
| Chrysiobacterium   | 0.0        | 0.1    | 0.0    | 0.0    | 0.0        | 0.0    | 0.3    | 0.0    | 0.0        | 0.0    | 0.0    | 0.0    | 0.0        | 0.0    | 0.0    | 0.0    | 0.1        | 0.5    | 0.0    | 0.0    | 0.0  | 0.0  | 0.1  | 0.0  | 0.0  |     |
| Brevundimonas      | 0.0        | 0.0    | 0.0    | 0.0    | 0.0        | 0.0    | 0.0    | 0.0    | 0.0        | 0.0    | 0.0    | 0.0    | 0.0        | 0.0    | 0.0    | 0.0    | 0.0        | 0.0    | 0.0    |        |      |      |      |      |      |     |

[illegible]

| Taxa                  | Healthy control |            |            |            |            |            |            |            |            |            |
|-----------------------|-----------------|------------|------------|------------|------------|------------|------------|------------|------------|------------|
|                       | Subject 01      | Subject 02 | Subject 03 | Subject 04 | Subject 05 | Subject 06 | Subject 07 | Subject 08 | Subject 09 | Subject 10 |
| Cutibacterium         | 28.8            | 42.0       | 61.8       | 10.3       | 31.0       | 49.6       | 55.9       | 48.8       | 45.9       | 35.0       |
| Staphylococcus        | 6.4             | 10.2       | 2.9        | 6.0        | 12.0       | 15.7       | 12.9       | 11.9       | 12.9       | 10.4       |
| Corynebacterium       | 4.2             | 26.4       | 14.1       | 3.5        | 14.8       | 11.4       | 1.8        | 7.3        | 14.2       | 16.4       |
| Streptococcus         | 14.1            | 4.2        | 4.4        | 17.8       | 11.2       | 5.6        | 1.2        | 3.1        | 1.9        | 7.0        |
| Stenotrophomonas      | 0.1             | 0.2        | 0.0        | 0.2        | 0.0        | 0.1        | 0.2        | 0.1        | 7.3        | 0.1        |
| Moraxella             | 1.9             | 0.4        | 2.5        | 8.9        | 0.4        | 2.7        | 6.7        | 0.0        | 8.6        | 3.2        |
| Finnegoldia           | 2.1             | 0.9        | 0.2        | 1.9        | 10.3       | 1.5        | 0.2        | 0.0        | 0.4        | 1.0        |
| Acinetobacter         | 0.6             | 0.1        | 0.1        | 2.9        | 0.0        | 0.0        | 0.1        | 4.8        | 1.3        | 0.1        |
| Deinococcus           | 1.3             | 0.0        | 1.2        | 16.8       | 0.3        | 0.6        | 0.4        | 0.5        | 0.2        | 0.3        |
| Roseomonas            | 2.8             | 1.7        | 0.3        | 0.1        | 0.9        | 0.0        | 0.7        | 0.0        | 0.0        | 0.3        |
| Noscomia              | 0.4             | 0.8        | 0.0        | 1.6        | 7.6        | 0.4        | 0.0        | 0.5        | 1.1        | 0.0        |
| Rothia                | 0.3             | 0.1        | 0.4        | 1.2        | 0.1        | 0.4        | 0.1        | 0.6        | 0.0        | 0.2        |
| Prevotella            | 3.9             | 0.0        | 0.9        | 0.8        | 0.2        | 0.1        | 0.0        | 0.0        | 0.7        | 0.0        |
| Asaerobacter          | 0.2             | 0.5        | 0.1        | 1.3        | 0.0        | 0.0        | 0.0        | 0.0        | 0.0        | 0.1        |
| Kocuria               | 0.2             | 0.1        | 2.3        | 0.6        | 0.2        | 0.8        | 0.6        | 2.7        | 0.0        | 0.5        |
| Haemophilus           | 0.3             | 0.2        | 0.1        | 0.2        | 0.1        | 2.5        | 0.2        | 0.6        | 0.5        | 2.4        |
| Paracoccus            | 0.3             | 0.2        | 0.0        | 0.2        | 0.0        | 0.1        | 0.0        | 0.0        | 0.0        | 2.0        |
| Lawsonella            | 1.9             | 0.1        | 0.3        | 0.3        | 0.5        | 0.5        | 0.2        | 0.0        | 0.0        | 1.8        |
| Bacillus              | 3.8             | 0.0        | 1.1        | 2.8        | 0.2        | 0.0        | 0.0        | 0.0        | 0.0        | 0.4        |
| Methylobacterium      | 0.0             | 0.0        | 0.0        | 3.3        | 0.1        | 0.2        | 0.2        | 0.7        | 0.2        | 1.0        |
| Verrucomella          | 0.2             | 0.1        | 0.0        | 0.0        | 0.0        | 0.0        | 0.0        | 0.0        | 0.0        | 1.7        |
| Gemmatimonas          | 0.1             | 0.1        | 0.0        | 0.2        | 0.1        | 0.2        | 0.6        | 0.0        | 0.2        | 0.0        |
| Sphingomonas          | 0.4             | 0.8        | 0.1        | 0.5        | 3.2        | 0.2        | 0.1        | 0.4        | 0.1        | 0.4        |
| Williamsia            | 0.1             | 1.6        | 0.3        | 0.1        | 0.1        | 0.9        | 0.0        | 1.2        | 0.3        | 0.0        |
| Pythiophilus          | 0.2             | 0.0        | 0.4        | 0.0        | 0.1        | 0.1        | 0.3        | 0.1        | 0.4        | 0.3        |
| Arachnia              | 0.1             | 0.8        | 0.0        | 0.1        | 0.0        | 0.0        | 0.2        | 0.0        | 0.0        | 0.0        |
| Escherichia           | 1.0             | 0.6        | 0.1        | 0.1        | 0.7        | 0.0        | 0.2        | 0.0        | 0.0        | 1.3        |
| Stenotrophomonas      | 1.9             | 0.1        | 0.0        | 0.0        | 0.2        | 0.2        | 4.7        | 0.3        | 0.0        | 0.0        |
| Microcoleus           | 0.1             | 0.0        | 0.2        | 5.7        | 0.9        | 1.2        | 0.2        | 0.0        | 0.0        | 0.0        |
| Serratia              | 0.1             | 0.0        | 0.6        | 1.3        | 0.2        | 0.1        | 1.1        | 0.6        | 0.3        | 0.2        |
| Pseudomonas           | 1.2             | 0.1        | 0.0        | 0.7        | 0.2        | 0.0        | 0.0        | 0.0        | 0.0        | 0.4        |
| Gemella               | 2.5             | 0.1        | 0.0        | 0.0        | 0.1        | 0.0        | 0.0        | 0.0        | 0.0        | 0.0        |
| Parapseudomonas       | 1.3             | 0.1        | 0.4        | 3.2        | 0.1        | 0.0        | 0.6        | 0.0        | 0.0        | 0.3        |
| Abiotrophia           | 1.9             | 0.1        | 0.1        | 1.7        | 0.1        | 0.0        | 0.2        | 0.0        | 0.0        | 0.4        |
| Mycobacterium         | 0.9             | 0.7        | 0.1        | 0.0        | 0.1        | 0.1        | 0.2        | 0.1        | 0.1        | 0.5        |
| Enterococcus          | 1.3             | 0.0        | 0.1        | 0.5        | 0.1        | 0.4        | 1.7        | 0.0        | 0.1        | 0.2        |
| Actinomyces           | 1.9             | 0.0        | 0.3        | 0.9        | 0.0        | 0.2        | 0.0        | 0.0        | 0.0        | 0.2        |
| Messilia              | 1.7             | 0.1        | 0.0        | 0.0        | 0.4        | 0.0        | 0.0        | 1.0        | 1.0        | 0.0        |
| Brevibacterium        | 0.7             | 0.1        | 0.2        | 0.4        | 0.1        | 0.0        | 0.0        | 0.0        | 0.6        | 0.9        |
| Micrococcus           | 0.1             | 0.1        | 0.5        | 0.3        | 0.0        | 0.4        | 0.0        | 0.0        | 0.0        | 0.0        |
| Kingella              | 0.1             | 0.0        | 0.0        | 0.1        | 0.1        | 0.0        | 0.0        | 1.4        | 0.5        | 0.0        |
| Dermacoccus           | 0.1             | 1.3        | 0.3        | 0.2        | 0.0        | 0.0        | 0.0        | 0.0        | 0.0        | 0.0        |
| Leptotrichia          | 0.9             | 0.0        | 0.2        | 0.0        | 0.1        | 0.0        | 0.0        | 0.0        | 0.0        | 0.6        |
| Fusobacterium         | 0.3             | 0.1        | 0.1        | 0.6        | 0.1        | 0.0        | 0.3        | 0.0        | 0.1        | 0.3        |
| Ellersella            | 0.1             | 0.0        | 0.0        | 0.0        | 0.0        | 0.0        | 0.0        | 1.3        | 0.4        | 0.0        |
| Mycobacterium         | 0.0             | 0.1        | 0.1        | 0.0        | 0.1        | 0.0        | 0.2        | 0.1        | 0.1        | 0.2        |
| Gordonia              | 0.2             | 0.2        | 0.0        | 0.0        | 0.0        | 0.2        | 1.1        | 0.1        | 0.1        | 0.4        |
| Tessaracoccus         | 0.1             | 0.0        | 0.2        | 0.1        | 0.1        | 0.0        | 0.3        | 0.1        | 0.2        | 0.2        |
| Rhodococcus           | 0.1             | 0.2        | 0.2        | 0.1        | 0.1        | 0.0        | 0.2        | 0.1        | 0.1        | 0.4        |
| Mitabacillus          | 0.0             | 0.0        | 0.1        | 0.0        | 0.0        | 0.0        | 0.0        | 0.1        | 0.0        | 0.1        |
| Prevotellamassilia    | 1.2             | 0.0        | 0.1        | 0.0        | 0.1        | 0.0        | 0.1        | 0.1        | 0.0        | 0.0        |
| Povallibacter         | 0.1             | 0.4        | 0.1        | 0.1        | 0.0        | 0.3        | 0.0        | 0.5        | 0.2        | 0.2        |
| Lactobacillus         | 0.9             | 0.1        | 0.0        | 0.0        | 0.1        | 0.0        | 1.0        | 0.1        | 0.1        | 0.0        |
| Microbacterium        | 0.1             | 0.0        | 0.1        | 0.0        | 0.0        | 0.0        | 0.0        | 0.0        | 0.0        | 0.2        |
| Methylobacterium      | 0.1             | 0.1        | 0.0        | 0.3        | 0.0        | 0.3        | 0.0        | 0.0        | 0.0        | 0.1        |
| Chryseobacterium      | 0.1             | 0.2        | 0.0        | 0.2        | 0.1        | 0.0        | 0.1        | 0.1        | 0.1        | 1.5        |
| Brevibacterium        | 0.1             | 0.2        | 0.0        | 0.0        | 0.0        | 0.0        | 0.0        | 0.0        | 0.0        | 1.7        |
| Nocardiothrix         | 0.1             | 0.0        | 0.2        | 0.0        | 0.0        | 0.0        | 0.1        | 0.1        | 0.1        | 0.1        |
| Moraxellacoccus       | 0.1             | 0.0        | 0.0        | 0.0        | 0.0        | 0.1        | 0.0        | 0.1        | 0.1        | 0.1        |
| Lactobacillus         | 0.8             | 0.1        | 0.1        | 0.4        | 0.1        | 0.0        | 0.1        | 0.0        | 0.1        | 0.1        |
| Stenotrophobacter     | 0.0             | 0.3        | 0.0        | 0.1        | 0.0        | 0.2        | 0.0        | 0.4        | 0.2        | 0.2        |
| Rahnella              | 0.1             | 0.0        | 0.0        | 0.0        | 0.0        | 0.0        | 0.0        | 0.1        | 0.1        | 0.2        |
| Macrococcus           | 0.1             | 0.1        | 0.0        | 0.0        | 0.0        | 0.1        | 0.0        | 0.1        | 0.0        | 0.2        |
| Pseudonocardia        | 0.0             | 0.2        | 0.1        | 0.0        | 0.0        | 0.0        | 0.1        | 0.1        | 0.1        | 0.2        |
| Alysella              | 0.1             | 0.1        | 0.0        | 0.0        | 0.0        | 0.1        | 0.1        | 0.3        | 0.1        | 0.2        |
| Dalister              | 0.1             | 0.8        | 0.0        | 0.0        | 0.6        | 0.2        | 0.0        | 0.1        | 0.0        | 0.2        |
| Pythiobacter          | 0.1             | 0.0        | 0.0        | 0.2        | 0.0        | 0.1        | 0.2        | 0.1        | 0.1        | 0.1        |
| Pantoea               | 0.1             | 0.0        | 0.0        | 0.0        | 0.0        | 0.0        | 0.1        | 0.1        | 0.1        | 0.2        |
| Cupriavidus           | 0.1             | 0.1        | 0.0        | 0.0        | 0.1        | 0.0        | 0.2        | 0.0        | 0.1        | 0.4        |
| Simonsella            | 0.1             | 0.0        | 0.0        | 0.0        | 0.1        | 0.1        | 0.0        | 0.6        | 0.3        | 0.0        |
| Leutrophia            | 0.6             | 0.0        | 0.1        | 0.0        | 0.0        | 0.1        | 0.1        | 0.1        | 0.0        | 0.2        |
| Eretria               | 0.0             | 0.1        | 0.1        | 0.0        | 0.0        | 0.0        | 0.1        | 0.0        | 0.0        | 0.1        |
| Nigerium              | 0.1             | 0.0        | 0.2        | 0.0        | 0.0        | 0.0        | 0.1        | 0.0        | 0.1        | 0.1        |
| Altierella            | 0.0             | 0.0        | 0.0        | 0.0        | 0.0        | 0.0        | 0.7        | 0.0        | 0.0        | 0.2        |
| Aggregatibacter       | 0.1             | 0.5        | 0.0        | 0.0        | 0.0        | 0.7        | 0.0        | 0.0        | 0.0        | 0.0        |
| Dietzia               | 0.0             | 0.1        | 0.2        | 0.0        | 0.1        | 0.1        | 0.0        | 0.1        | 0.0        | 0.2        |
| Bifidobacterium       | 0.1             | 0.1        | 0.1        | 0.0        | 0.1        | 0.0        | 2.8        | 0.2        | 0.1        | 0.0        |
| Vitrocella            | 0.1             | 0.0        | 0.1        | 0.0        | 0.0        | 0.1        | 0.0        | 1.0        | 0.3        | 0.0        |
| Tsukamurella          | 0.0             | 0.0        | 0.2        | 0.0        | 0.0        | 0.0        | 0.1        | 0.1        | 0.1        | 0.1        |
| Schaealia             | 0.2             | 0.0        | 0.1        | 0.1        | 0.2        | 0.2        | 0.0        | 0.1        | 0.1        | 0.4        |
| Gleboceopopsis        | 0.1             | 0.0        | 0.0        | 0.0        | 0.0        | 0.0        | 0.6        | 0.0        | 0.1        | 0.0        |
| Rhodospirillum        | 0.1             | 0.0        | 0.1        | 0.0        | 0.0        | 0.0        | 0.0        | 0.1        | 0.1        | 0.0        |
| Nocardia              | 0.0             | 0.0        | 0.0        | 0.1        | 0.1        | 0.0        | 0.2        | 0.0        | 0.0        | 0.3        |
| Brachybacterium       | 0.1             | 0.1        | 0.0        | 0.0        | 0.0        | 0.0        | 0.0        | 0.0        | 0.0        | 0.2        |
| Janibacter            | 0.1             | 0.0        | 0.0        | 0.3        | 0.0        | 0.0        | 0.0        | 0.0        | 0.0        | 0.0        |
| Lysobacter            | 0.0             | 0.0        | 0.0        | 0.0        | 0.1        | 0.0        | 0.0        | 0.0        | 0.0        | 0.0        |
| Facklamia             | 0.1             | 0.8        | 0.0        | 0.1        | 0.1        | 0.1        | 0.1        | 0.1        | 0.0        | 0.0        |
| Sphingopyxis          | 0.1             | 0.1        | 0.1        | 0.0        | 0.1        | 0.1        | 0.0        | 0.1        | 0.1        | 0.0        |
| Flavobacterium        | 0.0             | 0.0        | 0.0        | 0.0        | 0.1        | 0.1        | 0.0        | 0.1        | 0.0        | 0.0        |
| Stenotrophomonas      | 0.0             | 0.0        | 0.1        | 0.0        | 0.1        | 0.1        | 0.0        | 0.0        | 0.0        | 0.0        |
| Alipia                | 0.1             | 0.0        | 0.1        | 0.0        | 0.1        | 0.1        | 0.0        | 0.0        | 0.1        | 0.2        |
| Pseudoglutamicobacter | 0.0             | 0.0        | 0.0        | 0.1        | 0.0        | 0.0        | 0.0        | 0.0        | 0.0        | 0.0        |
| Hydrobacter           | 0.2             | 0.0        | 0.0        | 0.5        | 0.1        | 0.3        | 0.0        | 0.0        | 0.0        | 0.1        |
| Dermobacter           | 0.2             | 0.0        | 0.1        | 0.1        | 0.0        | 0.1        | 0.1        | 0.1        | 0.1        | 0.4        |
| Pectobacterium        | 0.1             | 0.1        | 0.0        | 0.1        | 0.0        | 0.0        | 0.0        | 0.1        | 0.1        | 0.0        |
| Stenotrophomonas      | 0.0             | 0.0        | 0.0        | 0.0        | 0.0        | 0.0        | 0.8        | 0.0        | 0.1        | 0.0        |
| Capnocytophaga        | 0.2             | 0.0        | 0.0        | 0.3        | 0.1        | 0.1        | 0.1        | 0.1        | 0.0        | 0.0        |
