# Supplementary material for: Dupilumab Alters Both the Bacterial and Fungal Skin Microbiomes of Patients with Atopic Dermatitis
Source: MDPI journal article supplement (doi:10.3390/microorganisms12010224), 2024-01-22
Supplement: s1 [file s1]

Table S1 Relative abundance (%) of fungal microbiome of subject involved in this study

| Taxa                                      | Subject_01 |        |        |        |         | Subject_02 |        |        |        |         | Subject_03 |        |        |        |         | Subject_04 |        |        |        |         | Subject_05 |        |        |        |         |
|-------------------------------------------|------------|--------|--------|--------|---------|------------|--------|--------|--------|---------|------------|--------|--------|--------|---------|------------|--------|--------|--------|---------|------------|--------|--------|--------|---------|
|                                           | Baseline   | Week 2 | Week 4 | Week 8 | Week 12 | Baseline   | Week 2 | Week 4 | Week 8 | Week 12 | Baseline   | Week 2 | Week 4 | Week 8 | Week 12 | Baseline   | Week 2 | Week 4 | Week 8 | Week 12 | Baseline   | Week 2 | Week 4 | Week 8 | Week 12 |
| <i>Malassezia restricta</i>               | 59.4       | 61.5   | 57.9   | 56.6   | 53.6    | 57.1       | 60.1   | 55.2   | 55.6   | 53.4    | 66.3       | 63.1   | 59.3   | 57.8   | 54.5    | 45.0       | 47.8   | 45.0   | 44.5   | 42.3    | 51.2       | 53.2   | 48.9   | 48.4   | 47.5    |
| <i>Malassezia globosa</i>                 | 30.6       | 23.5   | 22.1   | 16.4   | 16.4    | 32.9       | 25.9   | 23.8   | 20.4   | 16.6    | 28.7       | 19.9   | 16.7   | 15.2   | 13.5    | 45.0       | 37.2   | 35.0   | 30.5   | 27.7    | 40.8       | 32.8   | 30.7   | 26.5   | 24.5    |
| <i>Malassezia sympodialis</i>             | 0.0        | 4.6    | 9.2    | 5.9    | 4.2     | 0.5        | 2.8    | 3.2    | 1.5    | 4.4     | 0.1        | 3.5    | 4.5    | 5.5    | 5.4     | 1.3        | 2.9    | 5.2    | 5.6    | 4.4     | 0.2        | 1.8    | 4.5    | 3.2    | 5.1     |
| <i>Malassezia yemotensis</i>              | 0.0        | 0.0    | 0.1    | 0.0    | 1.3     | 0.0        | 0.0    | 0.0    | 0.0    | 0.0     | 0.0        | 0.0    | 0.0    | 0.0    | 0.0     | 1.4        | 0.0    | 0.0    | 0.3    | 1.5     | 0.0        | 0.4    | 1.1    | 0.4    | 0.5     |
| <i>Malassezia dermatis</i>                | 0.0        | 0.4    | 0.0    | 2.3    | 4.3     | 0.0        | 0.0    | 0.0    | 0.0    | 0.0     | 0.0        | 0.0    | 2.1    | 2.1    | 1.4     | 0.0        | 0.5    | 0.0    | 0.0    | 0.2     | 0.0        | 0.0    | 0.0    | 0.0    | 0.0     |
| <i>Malassezia japonica</i>                | 0.0        | 0.0    | 0.0    | 0.1    | 0.0     | 0.0        | 0.0    | 0.0    | 0.0    | 0.0     | 0.0        | 0.0    | 1.2    | 0.3    | 0.0     | 0.0        | 0.0    | 0.0    | 0.0    | 0.1     | 0.0        | 0.0    | 0.0    | 0.0    | 1.5     |
| <i>Malassezia cinnosa</i>                 | 0.0        | 0.0    | 0.2    | 0.0    | 0.0     | 0.0        | 0.0    | 0.4    | 0.0    | 0.0     | 0.0        | 0.5    | 0.0    | 0.0    | 0.1     | 0.0        | 0.0    | 0.0    | 1.1    | 1.1     | 0.0        | 0.0    | 0.5    | 2.0    | 0.0     |
| <i>Malassezia furfur</i>                  | 0.0        | 0.0    | 0.0    | 0.0    | 0.0     | 0.0        | 0.0    | 0.0    | 0.0    | 0.0     | 0.0        | 0.3    | 0.0    | 0.3    | 0.0     | 0.0        | 0.0    | 0.0    | 0.0    | 0.0     | 0.0        | 0.0    | 0.0    | 0.0    | 0.2     |
| <i>Malassezia slooffiae</i>               | 0.2        | 0.0    | 0.0    | 0.0    | 0.2     | 0.0        | 1.0    | 0.0    | 0.0    | 0.0     | 0.0        | 0.2    | 1.2    | 0.0    | 0.0     | 0.2        | 0.0    | 0.0    | 0.4    | 1.1     | 0.0        | 0.0    | 0.0    | 0.4    | 0.6     |
| <i>Aureobasidium</i>                      | 0.0        | 0.0    | 0.0    | 0.4    | 1.2     | 0.0        | 0.0    | 2.3    | 0.0    | 1.1     | 0.0        | 0.0    | 0.0    | 2.9    | 1.4     | 0.0        | 0.0    | 0.0    | 0.0    | 0.0     | 2.2        | 0.0    | 2.4    | 0.5    | 0.5     |
| <i>Rhodotulula mucilaginosa</i>           | 2.3        | 2.5    | 2.2    | 3.2    | 4.3     | 4.0        | 3.2    | 4.8    | 5.7    | 4.3     | 1.1        | 3.7    | 3.5    | 5.8    | 4.4     | 3.4        | 2.6    | 2.1    | 4.3    | 4.3     | 0.0        | 1.1    | 2.2    | 1.0    | 0.6     |
| <i>Aspergillus</i>                        | 0.0        | 0.0    | 0.0    | 0.0    | 2.3     | 0.0        | 0.0    | 0.0    | 0.0    | 0.5     | 0.0        | 0.0    | 4.3    | 1.3    | 0.4     | 1.0        | 1.7    | 0.0    | 0.0    | 0.0     | 3.2        | 1.1    | 2.9    | 1.1    | 0.4     |
| <i>Cladophorium</i>                       | 3.2        | 0.0    | 0.0    | 2.3    | 2.5     | 0.0        | 0.0    | 1.2    | 2.3    | 0.0     | 0.0        | 3.2    | 0.7    | 2.2    | 1.3     | 0.2        | 1.7    | 4.3    | 3.3    | 3.2     | 0.9        | 1.4    | 1.0    | 0.9    | 0.5     |
| <i>Torula herbarum</i>                    | 0.0        | 0.0    | 0.0    | 0.0    | 0.2     | 0.0        | 0.0    | 0.2    | 0.5    | 0.0     | 0.0        | 0.0    | 0.0    | 0.0    | 0.0     | 0.0        | 0.0    | 0.0    | 0.3    | 0.2     | 0.0        | 0.0    | 0.0    | 0.0    | 0.2     |
| <i>Nagashiiella friedmannii</i>           | 0.0        | 0.0    | 0.0    | 0.0    | 0.2     | 0.0        | 0.0    | 0.0    | 0.0    | 0.0     | 0.0        | 0.0    | 0.0    | 0.0    | 0.0     | 0.0        | 0.0    | 0.0    | 0.0    | 0.0     | 0.0        | 0.0    | 0.4    | 0.0    | 0.0     |
| <i>Candida albicans</i>                   | 0.5        | 0.3    | 0.2    | 0.0    | 0.0     | 3.2        | 3.0    | 2.2    | 0.3    | 0.6     | 1.5        | 0.6    | 0.4    | 0.4    | 0.0     | 0.0        | 1.4    | 0.5    | 0.1    | 0.1     | 1.6        | 0.5    | 0.2    | 0.4    | 0.1     |
| <i>Candida parapsilosis</i>               | 1.1        | 1.0    | 3.2    | 4.5    | 4.6     | 1.7        | 1.0    | 5.5    | 4.3    | 2.5     | 2.2        | 2.2    | 0.0    | 0.0    | 0.0     | 3.2        | 2.2    | 3.5    | 4.5    | 5.5     | 4.3        | 0.0    | 1.7    | 3.2    | 0.2     |
| <i>Alternaria</i>                         | 2.2        | 1.1    | 0.2    | 0.0    | 1.0     | 0.0        | 0.0    | 0.0    | 2.2    | 1.3     | 0.0        | 0.0    | 0.0    | 1.1    | 0.0     | 0.0        | 0.0    | 0.0    | 0.0    | 0.0     | 0.0        | 0.0    | 0.0    | 0.4    | 0.0     |
| <i>Cyrtobasidium slooffiae</i>            | 0.0        | 0.3    | 0.0    | 0.0    | 0.0     | 0.2        | 1.0    | 0.0    | 0.0    | 0.0     | 0.0        | 0.0    | 0.0    | 0.0    | 0.2     | 0.0        | 0.0    | 0.3    | 0.3    | 1.4     | 0.0        | 1.5    | 0.0    | 0.0    | 0.0     |
| <i>Pichia membranifaciens</i>             | 0.0        | 0.0    | 0.3    | 0.0    | 0.0     | 0.0        | 0.0    | 0.8    | 0.0    | 0.0     | 0.0        | 0.0    | 0.0    | 0.0    | 0.0     | 0.0        | 0.0    | 0.0    | 0.0    | 0.0     | 0.3        | 0.0    | 0.1    | 0.2    | 0.2     |
| <i>Symptodomyces</i>                      | 0.0        | 0.2    | 0.0    | 0.1    | 0.0     | 0.0        | 0.0    | 0.0    | 0.0    | 0.0     | 0.0        | 0.0    | 0.0    | 0.0    | 0.0     | 0.0        | 0.6    | 0.3    | 0.0    | 0.0     | 0.0        | 0.0    | 0.2    | 0.1    | 0.4     |
| <i>[Candida] glabrata</i>                 | 0.0        | 0.0    | 0.3    | 0.0    | 0.1     | 0.0        | 1.0    | 0.0    | 1.1    | 1.5     | 0.0        | 0.0    | 0.0    | 1.4    | 0.1     | 0.0        | 0.0    | 0.0    | 0.0    | 0.0     | 0.0        | 1.4    | 0.2    | 0.3    | 0.5     |
| <i>Filobasidium fulvum</i>                | 0.1        | 0.0    | 0.0    | 0.0    | 0.1     | 0.0        | 0.0    | 0.0    | 0.0    | 0.0     | 0.0        | 0.0    | 0.0    | 0.0    | 0.0     | 0.0        | 0.0    | 0.1    | 0.0    | 0.0     | 0.0        | 0.0    | 0.0    | 0.0    | 0.2     |
| <i>Erythrobasidium hasagawianum</i>       | 0.0        | 0.0    | 0.0    | 0.0    | 0.0     | 0.0        | 1.0    | 0.0    | 0.0    | 0.0     | 0.0        | 0.2    | 0.0    | 0.1    | 0.0     | 0.0        | 0.0    | 0.0    | 0.1    | 0.0     | 0.0        | 0.0    | 0.0    | 0.0    | 0.0     |
| <i>Krutzii</i>                            | 0.0        | 0.0    | 0.1    | 0.0    | 0.1     | 0.0        | 0.0    | 0.0    | 0.0    | 0.0     | 0.0        | 0.0    | 0.0    | 0.0    | 0.0     | 0.0        | 0.0    | 0.0    | 0.0    | 0.1     | 0.0        | 0.0    | 0.0    | 0.0    | 0.0     |
| <i>Vitaeozyma camescens</i>               | 0.0        | 0.3    | 0.0    | 0.0    | 0.1     | 0.0        | 0.0    | 0.4    | 0.2    | 1.1     | 0.0        | 0.0    | 0.4    | 0.0    | 0.0     | 0.0        | 0.0    | 0.0    | 0.3    | 0.0     | 0.0        | 0.0    | 0.2    | 0.0    | 0.0     |
| <i>Cyrtobasidium minutum</i>              | 0.0        | 0.0    | 0.3    | 0.1    | 0.1     | 0.0        | 0.0    | 0.0    | 0.0    | 0.0     | 0.0        | 0.0    | 0.0    | 0.0    | 0.3     | 0.0        | 0.0    | 0.1    | 0.0    | 0.0     | 0.0        | 0.0    | 0.2    | 0.0    | 0.0     |
| <i>[Candida] zeylanoides</i>              | 0.3        | 0.0    | 0.0    | 0.0    | 0.0     | 0.0        | 0.3    | 0.0    | 0.0    | 0.0     | 0.0        | 0.0    | 0.0    | 0.0    | 0.0     | 0.2        | 0.5    | 0.3    | 0.0    | 0.1     | 0.0        | 0.0    | 0.5    | 0.0    | 0.0     |
| <i>Fusarium</i>                           | 0.0        | 0.0    | 0.0    | 0.1    | 0.1     | 0.0        | 0.0    | 0.0    | 0.0    | 1.1     | 0.0        | 1.6    | 0.0    | 0.0    | 0.0     | 0.0        | 0.0    | 0.2    | 0.4    | 0.0     | 0.0        | 0.0    | 0.0    | 1.4    | 0.0     |
| <i>Debaryomyces hansenii/fabryi/vindt</i> | 0.0        | 0.0    | 2.3    | 0.0    | 0.1     | 0.0        | 0.0    | 0.0    | 0.0    | 0.0     | 0.0        | 0.0    | 2.3    | 0.0    | 0.5     | 0.0        | 0.0    | 0.2    | 0.0    | 0.0     | 0.0        | 0.0    | 0.2    | 3.5    | 1.2     |
| <i>Villosiclava</i>                       | 0.0        | 0.4    | 0.0    | 0.0    | 0.4     | 0.0        | 0.0    | 0.0    | 1.1    | 0.0     | 0.0        | 0.4    | 0.0    | 0.0    | 0.0     | 0.3        | 0.0    | 0.0    | 0.0    | 0.0     | 0.0        | 0.0    | 0.0    | 0.0    | 0.0     |
| <i>Trichosporon coremiforme</i>           | 0.0        | 0.1    | 0.0    | 0.0    | 0.1     | 0.0        | 0.0    | 0.0    | 0.0    | 0.0     | 0.0        | 0.0    | 0.0    | 0.0    | 0.2     | 0.0        | 0.0    | 0.0    | 0.0    | 0.2     | 0.0        | 0.0    | 0.0    | 0.0    | 0.0     |
| <i>Saltzmania fava</i>                    | 0.0        | 0.0    | 0.0    | 0.0    | 0.0     | 0.0        | 0.0    | 0.0    | 0.0    | 0.0     | 0.0        | 0.0    | 0.0    | 0.0    | 0.0     | 0.2        | 0.0    | 0.0    | 0.0    | 0.0     | 0.0        | 0.0    | 0.0    | 0.0    | 0.0     |
| <i>Cyrtobasidium capitatum</i>            | 0.0        | 0.0    | 0.0    | 0.0    | 0.1     | 0.0        | 0.0    | 0.0    | 0.0    | 0.0     | 0.0        | 0.0    | 0.0    | 0.0    | 0.0     | 0.0        | 0.5    | 0.0    | 0.2    | 0.0     | 0.0        | 0.0    | 0.1    | 1.6    | 0.0     |
| <i>Sarcodiscium</i>                       | 0.0        | 0.0    | 0.2    | 0.0    | 0.1     | 0.0        | 0.0    | 0.0    | 0.0    | 0.0     | 0.0        | 0.4    | 0.0    | 0.4    | 0.0     | 0.4        | 0.0    | 0.0    | 0.1    | 0.2     | 0.0        | 0.0    | 0.3    | 0.0    | 0.0     |
| <i>Penicillium</i>                        | 0.0        | 0.0    | 0.2    | 0.0    | 0.0     | 0.0        | 0.0    | 0.0    | 0.0    | 0.0     | 0.0        | 0.0    | 0.0    | 0.0    | 0.0     | 0.0        | 0.0    | 0.0    | 0.0    | 0.0     | 0.0        | 0.0    | 0.4    | 0.2    | 0.3     |
| <i>Vermicaria</i>                         | 0.0        | 0.0    | 0.0    | 0.3    | 0.1     | 0.0        | 0.0    | 0.0    | 0.0    | 0.0     | 0.0        | 0.0    | 0.0    | 0.0    | 0.6     | 0.0        | 0.0    | 0.4    | 0.2    | 0.4     | 0.4        | 0.0    | 0.0    | 0.0    | 0.0     |
| <i>Saccharomyces cerevisiae</i>           | 0.0        | 0.0    | 0.0    | 0.3    | 0.1     | 0.0        | 0.0    | 0.0    | 1.1    | 0.0     | 0.0        | 0.3    | 0.0    | 0.0    | 0.0     | 0.0        | 0.0    | 0.0    | 0.1    | 0.1     | 0.2        | 0.0    | 0.0    | 0.0    | 0.0     |
| <i>Stegobotryomyces halophilus</i>        | 0.0        | 0.0    | 0.0    | 0.0    | 0.0     | 0.0        | 0.0    | 0.0    | 0.0    | 0.0     | 0.0        | 0.0    | 0.0    | 0.0    | 0.0     | 0.0        | 0.0    | 0.0    | 0.0    | 0.0     | 0.0        | 0.0    | 0.0    | 0.0    | 0.0     |
| <i>Microsporus</i>                        | 0.0        | 0.0    | 0.0    | 0.2    | 0.1     | 0.0        | 0.0    | 0.0    | 0.0    | 0.9     | 0.0        | 0.0    | 0.0    | 0.0    | 0.0     | 0.4        | 0.0    | 0.0    | 0.0    | 0.0     | 0.0        | 0.0    | 0.4    | 0.0    | 0.0     |
| <i>Wallersteina</i>                       | 0.0        | 0.0    | 0.0    | 0.0    | 0.0     | 0.0        | 0.0    | 0.0    | 0.0    | 0.0     | 0.0        | 0.0    | 0.0    | 0.0    | 0.0     | 0.0        | 0.0    | 0.0    | 0.0    | 0.0     | 0.0        | 0.0    | 0.0    | 0.0    | 0.0     |
| <i>Papillotrema flavescens</i>            | 0.0        | 0.0    | 0.0    | 0.0    | 0.0     | 0.0        | 0.0    | 0.0    | 0.0    | 0.0     | 0.0        | 0.0    | 0.0    | 0.0    | 0.2     | 0.0        | 0.0    | 0.0    | 0.0    | 0.0     | 0.0        | 0.0    | 0.5    | 0.0    | 0.5     |
| <i>Filobasidium unguiculatum</i>          | 0.0        | 0.0    | 0.0    | 0.2    | 0.0     | 0.0        | 0.0    | 0.0    | 0.0    | 0.0     | 0.0        | 0.0    | 0.0    | 1.5    | 0.0     | 0.0        | 0.0    | 0.2    | 0.0    | 0.2     | 0.0        | 0.0    | 0.0    | 2.3    | 0.6     |
| <i>Taphnia</i>                            | 0.0        | 0.0    | 0.0    | 0.0    | 0.0     | 0.0        | 0.0    | 0.0    | 0.0    | 0.0     | 0.0        | 0.0    | 0.0    | 0.0    | 0.0     | 0.0        | 0.0    | 0.0    | 0.0    | 0.0     | 0.0        | 0.0    | 0.0    | 0.0    | 0.0     |
| <i>Acremonium</i>                         | 0.0        | 0.0    | 0.0    | 0.0    | 0.0     | 0.0        | 0.0    | 0.0    | 2.2    | 0.0     | 0.0        | 0.0    | 0.0    | 0.0    | 0.7     | 0.0        | 0.0    | 0.0    | 0.0    | 0.0     | 0.0        | 0.0    | 0.0    | 0.0    | 0.0     |
| <i>Filobasidium magnum</i>                | 0.4        | 0.0    | 0.0    | 0.0    | 0.0     | 0.0        | 0.0    | 0.0    | 0.0    | 0.0     | 0.0        | 1.4    | 0.0    | 0.0    | 0.0     | 0.0        | 0.0    | 0.0    | 0.0    | 0.0     | 0.0        | 0.0    | 0.0    | 0.0    | 0.5     |
| <i>Vitaeozyma victoriae</i>               | 0.0        | 0.0    | 0.4    | 0.0    | 0.4     | 0.0        | 0.0    | 0.0    | 0.0    | 0.9     | 0.0        | 0.0    | 0.0    | 0.9    | 0.0     | 0.0        | 0.0    | 0.0    | 0.0    | 0.0     | 0.0        | 0.0    | 0.0    | 0.0    | 0.0     |
| <i>Epicoicum</i>                          | 0.0        | 0.0    | 0.0    | 0.3    | 0.0     | 0.0        | 0.0    | 0.0    | 0.0    | 0.0     | 0.0        | 0.0    | 0.5    | 0.3    | 0.0     | 0.0        | 0.0    | 0.0    | 0.0    | 0.0     | 0.0        | 0.0    | 0.0    | 0.0    | 1.1     |
| <i>Cernosea</i>                           | 0.0        | 0.0    | 0.0    | 0.0    | 0.0     | 0.0        | 0.0    | 0.0    | 0.0    | 0.8     | 0.0        | 0.0    | 0.0    | 0.0    | 0.0     | 0.0        | 0.0    | 0.0    | 0.0    | 0.0     | 0.0        | 0.0    | 0.0    | 0.0    | 0.0     |
| <i>Trichosporon fasciale</i>              | 0.0        | 0.0    | 0.0    | 0.9    | 0.0     | 0.0        | 0.0    | 0.0    | 0.0    | 0.0     | 0.0        | 0.0    | 0.0    | 0.0    | 0.0     | 0.0        | 0.0    | 0.0    | 0.0    | 0.0     | 0.3        | 0.0    | 0.0    | 0.4    | 0.0     |
| <i>Trichomerium</i>                       | 0.0        | 0.0    | 0.0    | 0.0    | 0.0     | 0.0        | 0.0    | 0.0    | 0.0    | 0.0     | 0.0        | 0.0    | 0.0    | 0.0    | 0.0     | 0.0        | 0.0    | 0.4    | 0.0    | 0.0     | 0.0        | 0.0    | 0.0    | 0.0    | 0.0     |
| <i>Papillotrema aurum</i>                 | 0.0        | 0.0    | 0.0    | 0.0    | 0.0     | 0.0        | 0.4    | 0.0    | 0.0    | 0.0     | 0.0        | 0.4    | 0.0    | 0.6    | 0.0     | 0.0        | 0.0    | 0.0    | 0.0    | 0.0     | 0.0        | 0.0    | 0.0    | 0.0    | 0.0     |
| <i>[Candida] sak</i>                      | 0.0        | 0.0    | 0.0    | 0.0    | 0.0     | 0.0        | 0.0    | 0.0    | 0.0    | 0.0     | 0.0        | 0.0    | 0.0    | 1.3    | 0.0     | 0.0        | 0.0    | 0.0    | 0.0    | 0.1     | 0.0        | 0.0    | 0.0    | 1.3    | 0.5     |
| <i>Chaetomium</i>                         | 0.0        | 0.0    | 0.0    | 0.0    | 0.0     | 0.0        | 0.0    | 0.0    | 0.0    | 0.0     | 0.0        | 0.0    | 0.0    | 0.0    | 0.0     | 0.0        | 0.0    | 0.2    | 0.0    | 0.0     | 0.0        | 0.0</  |        |        |         |

| Taxa                                     | Subject 11 |        |        |        |         | Subject 12 |        |        |        |         | Subject 13 |        |        |        |         | Subject 14 |        |        |        |         | Subject 15 |        |        |        |         |
|------------------------------------------|------------|--------|--------|--------|---------|------------|--------|--------|--------|---------|------------|--------|--------|--------|---------|------------|--------|--------|--------|---------|------------|--------|--------|--------|---------|
|                                          | Baseline   | Week 2 | Week 4 | Week 8 | Week 12 | Baseline   | Week 2 | Week 4 | Week 8 | Week 12 | Baseline   | Week 2 | Week 4 | Week 8 | Week 12 | Baseline   | Week 2 | Week 4 | Week 8 | Week 12 | Baseline   | Week 2 | Week 4 | Week 8 | Week 12 |
| <i>Malassezia restricta</i>              | 0.3        | 62.5   | 57.4   | 57.6   | 55.2    | 61.3       | 62.3   | 58.5   | 57.0   | 53.8    | 61.4       | 65.1   | 61.2   | 59.7   | 64.5    | 62.2       | 75.1   | 68.0   | 67.7   | 64.9    | 41.0       | 45.8   | 42.3   | 44.4   | 39.3    |
| <i>Malassezia globosa</i>                | 30.7       | 23.5   | 21.6   | 18.4   | 16.7    | 29.1       | 20.8   | 19.5   | 16.0   | 14.2    | 26.6       | 19.9   | 18.8   | 15.3   | 13.6    | 18.6       | 11.9   | 11.0   | 8.3    | 7.1     | 44.6       | 38.0   | 35.7   | 31.1   | 28.2    |
| <i>Malassezia sympodialis</i>            | 1.4        | 3.3    | 5.6    | 3.4    | 10.2    | 0.2        | 0.4    | 0.6    | 1.1    | 2.9     | 0.5        | 0.8    | 1.9    | 0.4    | 4.6     | 1.1        | 3.3    | 4.3    | 3.9    | 3.4     | 2.9        | 2.2    | 1.1    | 7.3    |         |
| <i>Malassezia yeastabonis</i>            | 0.0        | 0.0    | 0.0    | 0.1    | 0.0     | 0.0        | 0.0    | 0.0    | 0.0    | 0.0     | 0.0        | 0.0    | 0.2    | 0.0    | 0.0     | 0.1        | 0.0    | 0.1    | 0.5    | 1.3     | 0.0        | 0.1    | 0.0    | 0.1    | 0.0     |
| <i>Malassezia dermatis</i>               | 0.0        | 0.0    | 0.0    | 0.0    | 0.0     | 0.3        | 1.2    | 0.0    | 0.0    | 0.4     | 0.0        | 0.0    | 0.3    | 0.0    | 0.4     | 0.0        | 0.5    | 0.0    | 0.0    | 0.0     | 0.2        | 0.0    | 0.1    | 0.0    | 1.3     |
| <i>Malassezia japonica</i>               | 0.2        | 0.0    | 0.2    | 0.3    | 0.1     | 0.0        | 0.0    | 0.0    | 0.0    | 0.0     | 1.1        | 0.3    | 0.0    | 0.4    | 0.0     | 0.0        | 0.0    | 0.0    | 0.0    | 0.0     | 0.1        | 0.1    | 0.0    | 0.0    | 0.2     |
| <i>Malassezia obtusa</i>                 | 0.0        | 0.1    | 0.0    | 0.0    | 0.0     | 0.0        | 0.4    | 0.4    | 0.8    | 1.4     | 0.0        | 0.0    | 2.1    | 0.0    | 0.3     | 0.5        | 0.0    | 0.0    | 0.0    | 0.9     | 0.7        | 0.0    | 0.3    | 0.2    | 0.1     |
| <i>Malassezia furfur</i>                 | 0.0        | 0.0    | 0.0    | 0.0    | 0.0     | 0.0        | 0.0    | 0.0    | 0.0    | 0.1     | 0.2        | 0.0    | 0.0    | 0.2    | 0.0     | 0.0        | 0.0    | 0.0    | 0.0    | 0.0     | 0.0        | 0.0    | 0.1    | 0.0    | 0.0     |
| <i>Malassezia sicoffiae</i>              | 0.0        | 0.2    | 0.0    | 0.3    | 0.0     | 0.0        | 0.4    | 0.4    | 0.0    | 0.0     | 0.0        | 0.2    | 1.1    | 0.0    | 0.0     | 1.1        | 1.0    | 0.0    | 0.4    | 0.7     | 0.0        | 0.2    | 0.0    | 0.0    | 0.0     |
| <i>Aureobasidium</i>                     | 0.0        | 0.0    | 0.0    | 0.0    | 0.5     | 0.0        | 0.2    | 0.0    | 0.0    | 0.0     | 0.0        | 0.0    | 0.0    | 0.0    | 0.0     | 0.0        | 0.0    | 0.0    | 0.0    | 0.0     | 1.1        | 3.2    | 1.3    | 0.2    | 1.0     |
| <i>Rhodotorula mucilaginosa</i>          | 0.3        | 1.4    | 0.3    | 3.4    | 4.7     | 1.2        | 0.0    | 0.4    | 1.5    | 1.0     | 1.3        | 0.4    | 1.4    | 1.9    | 1.0     | 0.5        | 2.1    | 2.3    | 3.2    | 5.5     | 2.9        | 2.0    | 3.9    | 4.3    | 3.2     |
| <i>Aspergillus</i>                       | 1.9        | 2.3    | 2.3    | 2.1    | 0.4     | 0.2        | 1.1    | 0.8    | 3.5    | 2.8     | 0.8        | 1.5    | 2.2    | 1.8    | 0.3     | 0.3        | 1.9    | 0.0    | 0.0    | 0.0     | 1.2        | 0.9    | 3.2    | 0.3    | 0.2     |
| <i>Cladosporium</i>                      | 0.0        | 0.0    | 2.9    | 0.0    | 0.0     | 1.4        | 2.4    | 0.2    | 3.6    | 3.2     | 0.0        | 0.0    | 0.0    | 1.5    | 1.2     | 0.2        | 1.1    | 3.6    | 2.2    | 2.9     | 2.4        | 1.2    | 2.4    | 5.9    | 1.0     |
| <i>Torula hedraeorum</i>                 | 0.0        | 0.0    | 0.0    | 0.0    | 0.0     | 0.0        | 0.0    | 0.0    | 0.0    | 0.0     | 0.0        | 0.0    | 0.0    | 0.0    | 0.0     | 0.0        | 0.0    | 0.0    | 0.3    | 0.1     | 0.0        | 0.0    | 0.0    | 0.1    | 0.0     |
| <i>Naganishia fredmannii</i>             | 0.3        | 0.3    | 0.1    | 0.1    | 0.3     | 0.2        | 0.4    | 0.0    | 0.1    | 0.0     | 0.1        | 0.3    | 0.5    | 0.2    | 0.9     | 0.5        | 0.0    | 0.0    | 0.0    | 0.2     | 0.0        | 0.0    | 0.0    | 0.0    | 2.1     |
| <i>Candida albicans</i>                  | 2.1        | 1.3    | 0.4    | 0.0    | 0.0     | 0.0        | 0.0    | 0.0    | 0.2    | 0.0     | 2.1        | 3.2    | 0.3    | 0.0    | 0.1     | 1.4        | 0.1    | 0.0    | 0.1    | 0.0     | 1.2        | 0.8    | 0.1    | 0.0    | 0.0     |
| <i>Candida parapsilosis</i>              | 2.7        | 3.6    | 4.6    | 5.5    | 5.4     | 3.2        | 3.9    | 7.1    | 3.9    | 2.9     | 3.4        | 8.4    | 4.9    | 6.3    | 9.3     | 1.3        | 4.0    | 3.6    | 7.4    | 5.5     | 1.9        | 2.4    | 4.5    | 7.5    | 9.3     |
| <i>Alternaria</i>                        | 0.0        | 0.0    | 0.0    | 0.0    | 0.0     | 0.0        | 0.0    | 0.0    | 0.0    | 0.0     | 0.0        | 0.0    | 0.0    | 0.0    | 0.0     | 0.0        | 0.0    | 0.0    | 0.0    | 0.0     | 0.3        | 0.0    | 0.0    | 0.0    | 0.1     |
| <i>Cyrtobasidium stioffiae</i>           | 0.0        | 0.0    | 0.0    | 0.0    | 0.0     | 0.0        | 0.0    | 0.3    | 0.0    | 0.4     | 0.0        | 0.0    | 0.0    | 0.0    | 0.2     | 0.1        | 0.0    | 0.0    | 0.3    | 0.8     | 0.3        | 0.0    | 0.1    | 0.0    | 0.2     |
| <i>Pichia membranifaciens</i>            | 0.1        | 0.2    | 0.0    | 0.2    | 0.1     | 0.1        | 0.2    | 0.4    | 0.3    | 1.7     | 0.2        | 0.1    | 0.1    | 0.3    | 0.1     | 0.0        | 0.1    | 0.0    | 0.0    | 0.0     | 0.1        | 0.0    | 0.0    | 0.0    | 0.2     |
| <i>Symptodomycesopsis</i>                | 0.0        | 0.2    | 0.0    | 0.3    | 0.0     | 0.0        | 0.0    | 0.0    | 0.0    | 0.0     | 1.0        | 0.1    | 0.1    | 0.0    | 0.0     | 0.0        | 0.3    | 0.6    | 0.1    | 0.0     | 0.0        | 0.0    | 0.0    | 0.1    | 0.0     |
| <i>[Candida] glabrata</i>                | 0.0        | 0.0    | 0.0    | 0.0    | 0.0     | 0.0        | 0.0    | 0.0    | 0.0    | 0.4     | 0.0        | 0.0    | 0.0    | 0.0    | 0.0     | 0.0        | 0.0    | 0.0    | 0.0    | 0.0     | 0.0        | 0.0    | 0.0    | 0.0    | 0.0     |
| <i>Filobasidium floriforme</i>           | 0.0        | 0.0    | 0.1    | 0.0    | 0.0     | 0.0        | 0.0    | 0.0    | 0.2    | 0.0     | 0.0        | 0.0    | 0.0    | 0.2    | 0.3     | 0.0        | 0.0    | 0.0    | 0.1    | 0.0     | 0.0        | 0.2    | 0.0    | 0.0    | 0.1     |
| <i>Erythrobasidium hasagawarum</i>       | 0.0        | 0.1    | 0.0    | 0.0    | 0.0     | 0.0        | 0.0    | 0.0    | 0.0    | 0.0     | 0.0        | 0.0    | 0.0    | 0.0    | 0.0     | 0.0        | 0.0    | 0.1    | 0.0    | 0.0     | 0.0        | 0.0    | 0.0    | 0.0    | 0.0     |
| <i>Kuflia</i>                            | 0.0        | 0.0    | 0.0    | 0.2    | 0.1     | 0.0        | 0.0    | 0.0    | 0.0    | 0.1     | 0.0        | 0.0    | 0.1    | 0.1    | 0.1     | 0.0        | 0.0    | 0.0    | 0.0    | 0.1     | 0.0        | 0.0    | 0.0    | 0.1    | 0.0     |
| <i>Vitrihacizyma carnesens</i>           | 0.0        | 0.0    | 0.0    | 0.3    | 0.0     | 0.0        | 0.0    | 0.1    | 0.0    | 0.0     | 0.0        | 0.0    | 0.0    | 0.1    | 0.0     | 0.0        | 0.0    | 0.0    | 0.3    | 0.1     | 0.0        | 0.0    | 0.0    | 0.0    | 0.0     |
| <i>Cyrtobasidium minutum</i>             | 0.0        | 0.0    | 0.0    | 0.2    | 0.0     | 0.0        | 0.0    | 0.0    | 0.0    | 0.0     | 0.0        | 0.0    | 0.0    | 0.1    | 0.0     | 0.0        | 0.0    | 0.1    | 0.0    | 0.0     | 0.0        | 0.0    | 0.0    | 0.0    | 0.0     |
| <i>[Candida] zeylanoides</i>             | 0.0        | 0.0    | 0.2    | 0.0    | 0.3     | 0.0        | 0.1    | 0.0    | 1.4    | 2.9     | 0.0        | 0.0    | 0.2    | 0.0    | 0.3     | 0.1        | 0.2    | 0.4    | 0.0    | 0.1     | 0.0        | 0.0    | 0.0    | 0.0    | 0.1     |
| <i>Fusarium</i>                          | 0.0        | 0.5    | 0.2    | 0.8    | 0.0     | 0.0        | 0.0    | 0.0    | 0.0    | 0.0     | 0.2        | 0.3    | 0.0    | 4.8    | 0.0     | 0.0        | 0.0    | 1.1    | 0.4    | 0.0     | 0.0        | 1.5    | 0.9    | 1.1    | 0.0     |
| <i>Debaryomyces hansenii/fabryi/vind</i> | 0.0        | 0.0    | 0.4    | 1.6    | 0.4     | 0.0        | 1.5    | 0.0    | 1.9    | 4.0     | 0.0        | 1.4    | 0.0    | 1.9    | 0.0     | 0.0        | 0.0    | 0.2    | 0.0    | 0.0     | 0.0        | 0.0    | 0.0    | 0.0    | 0.0     |
| <i>Villosclavia</i>                      | 0.0        | 0.0    | 0.1    | 0.0    | 0.1     | 0.0        | 0.0    | 0.0    | 0.0    | 0.0     | 0.0        | 0.0    | 0.1    | 0.0    | 0.1     | 0.0        | 0.0    | 0.0    | 0.3    | 0.0     | 0.0        | 0.1    | 0.0    | 0.0    | 0.0     |
| <i>Trichosporon coremiforme</i>          | 0.0        | 0.1    | 0.0    | 0.1    | 0.0     | 0.0        | 0.0    | 0.0    | 0.0    | 0.0     | 0.0        | 0.0    | 0.0    | 0.2    | 0.0     | 0.0        | 0.0    | 0.1    | 0.0    | 0.0     | 0.0        | 0.0    | 0.0    | 0.0    | 0.1     |
| <i>Salizyma fava</i>                     | 0.0        | 0.1    | 0.0    | 0.0    | 0.1     | 0.0        | 0.0    | 0.0    | 0.0    | 0.0     | 0.0        | 0.0    | 0.0    | 0.0    | 0.1     | 0.0        | 0.0    | 0.2    | 0.1    | 0.1     | 0.0        | 0.0    | 0.0    | 0.1    | 0.1     |
| <i>Cyrtobasidium capitatum</i>           | 0.0        | 0.0    | 0.2    | 0.0    | 0.0     | 0.0        | 1.5    | 0.2    | 0.1    | 0.1     | 0.0        | 0.0    | 0.1    | 0.0    | 0.0     | 0.0        | 2.2    | 0.0    | 0.2    | 0.0     | 0.0        | 0.0    | 0.2    | 0.0    | 0.0     |
| <i>Sarcodon</i>                          | 0.0        | 0.2    | 0.1    | 0.2    | 0.0     | 0.0        | 0.0    | 0.0    | 0.0    | 0.0     | 0.1        | 0.0    | 0.0    | 0.0    | 0.0     | 0.0        | 0.0    | 0.1    | 0.1    | 0.0     | 0.0        | 0.0    | 0.0    | 0.0    | 0.0     |
| <i>Penicillium</i>                       | 0.0        | 0.0    | 0.0    | 0.0    | 0.0     | 0.0        | 0.0    | 0.4    | 3.2    | 0.4     | 0.0        | 0.0    | 0.0    | 0.0    | 0.0     | 0.0        | 0.0    | 0.4    | 0.2    | 0.3     | 0.0        | 1.4    | 0.0    | 2.3    | 0.1     |
| <i>Vermicaria</i>                        | 0.0        | 0.1    | 0.0    | 0.0    | 0.2     | 0.0        | 0.0    | 0.0    | 0.0    | 0.0     | 0.0        | 0.1    | 0.0    | 0.0    | 0.0     | 0.0        | 0.0    | 0.2    | 0.8    | 0.2     | 0.0        | 0.1    | 0.0    | 0.0    | 0.0     |
| <i>Saccharomyces cerevisiae</i>          | 0.1        | 0.0    | 0.1    | 0.0    | 0.1     | 0.0        | 0.0    | 0.0    | 0.1    | 0.0     | 0.1        | 0.0    | 0.1    | 0.1    | 0.1     | 0.0        | 0.0    | 0.1    | 0.0    | 0.1     | 0.0        | 0.1    | 0.0    | 0.1    | 0.0     |
| <i>Stigmatomyces halophilus</i>          | 0.0        | 0.0    | 0.0    | 0.1    | 0.1     | 0.0        | 0.1    | 0.2    | 0.1    | 0.1     | 0.0        | 0.1    | 0.0    | 0.1    | 0.0     | 0.0        | 0.0    | 0.0    | 0.0    | 0.0     | 0.0        | 0.0    | 0.0    | 0.2    | 0.0     |
| <i>Micromonospora</i>                    | 0.0        | 0.0    | 0.0    | 0.0    | 0.0     | 0.0        | 0.0    | 0.0    | 0.0    | 0.0     | 0.0        | 0.0    | 0.0    | 0.0    | 0.0     | 0.0        | 0.0    | 0.0    | 0.0    | 0.0     | 0.0        | 0.0    | 0.0    | 0.0    | 0.0     |
| <i>Walleria</i>                          | 0.0        | 0.0    | 0.0    | 0.0    | 0.0     | 0.0        | 0.0    | 0.0    | 0.0    | 0.0     | 0.1        | 0.0    | 0.0    | 0.0    | 0.0     | 0.0        | 0.0    | 0.0    | 0.0    | 0.0     | 0.0        | 0.0    | 0.0    | 0.1    | 0.1     |
| <i>Papillotrema flavescens</i>           | 0.0        | 0.3    | 0.2    | 0.0    | 0.0     | 0.0        | 0.0    | 0.0    | 0.0    | 0.0     | 1.4        | 0.2    | 0.0    | 0.0    | 0.0     | 0.0        | 0.0    | 0.0    | 0.0    | 0.0     | 0.0        | 0.9    | 0.0    | 0.0    | 0.1     |
| <i>Filobasidium magnum</i>               | 0.0        | 0.0    | 0.0    | 0.0    | 0.0     | 0.0        | 1.1    | 0.5    | 0.9    | 0.3     | 0.0        | 0.0    | 0.0    | 0.4    | 0.0     | 0.0        | 0.0    | 0.2    | 0.0    | 0.2     | 0.0        | 0.0    | 0.0    | 0.0    | 0.0     |
| <i>Taphnia</i>                           | 0.0        | 0.0    | 0.0    | 0.0    | 0.1     | 0.0        | 0.0    | 0.0    | 0.0    | 0.0     | 0.0        | 0.0    | 0.0    | 0.0    | 0.1     | 0.0        | 0.0    | 0.0    | 0.0    | 0.1     | 0.0        | 0.0    | 0.0    | 0.0    | 0.0     |
| <i>Acronium</i>                          | 0.0        | 0.0    | 0.0    | 0.0    | 0.0     | 0.0        | 0.0    | 0.0    | 0.0    | 0.0     | 0.0        | 0.0    | 0.0    | 0.0    | 0.0     | 0.0        | 0.0    | 0.0    | 0.0    | 0.0     | 0.0        | 0.0    | 0.0    | 0.0    | 0.0     |
| <i>Filobasidium magnum</i>               | 0.0        | 0.0    | 0.0    | 0.0    | 0.0     | 0.0        | 0.1    | 1.4    | 0.2    | 0.5     | 0.0        | 0.0    | 0.0    | 0.0    | 0.0     | 0.0        | 0.0    | 0.0    | 0.0    | 0.1     | 0.0        | 0.0    | 0.3    | 0.2    | 0.2     |
| <i>Vitrihacizyma victoriae</i>           | 0.0        | 0.0    | 0.0    | 0.1    | 0.0     | 0.0        | 0.0    | 0.0    | 0.0    | 0.0     | 0.0        | 0.2    | 0.3    | 0.0    | 0.0     | 0.0        | 0.0    | 0.3    | 0.0    | 0.0     | 0.0        | 0.0    | 0.0    | 0.0    | 0.3     |
| <i>Epicroccum</i>                        | 0.0        | 0.0    | 0.0    | 0.0    | 0.0     | 0.0        | 0.0    | 0.0    | 0.0    | 0.0     | 0.0        | 0.0    | 0.0    | 0.0    | 0.0     | 0.0        | 0.0    | 0.0    | 0.0    | 0.0     | 0.0        | 0.0    | 0.0    | 0.0    | 0.0     |
| <i>Cernosea</i>                          | 0.0        | 0.0    | 0.0    | 0.0    | 0.0     | 0.0        | 0.0    | 0.0    | 0.0    | 0.0     | 0.0        | 0.0    | 0.0    | 0.0    | 0.0     | 0.0        | 0.0    | 0.0    | 0.0    | 0.0     | 0.0        | 0.0    | 0.0    | 0.0    | 0.0     |
| <i>Trichosporon faveale</i>              | 0.0        | 0.0    | 0.0    | 0.0    | 0.1     | 0.0        | 0.0    | 0.0    | 0.0    | 0.0     | 0.0        | 0.0    | 0.0    | 0.0    | 0.0     | 0.0        | 0.0    | 0.0    | 0.0    | 0.0     | 0.0        | 0.0    | 0.0    | 0.0    | 0.0     |
| <i>[Candida] sak</i>                     | 0.0        | 0.1    | 0.0    | 0.1    | 0.1     | 0.0        | 0.0    | 0.0    | 0.0    | 0.0     | 0.0        | 0.0    | 0.0    | 0.0    | 0.0     | 0.0        | 0.0    | 0.0    | 0.0    | 0.0     | 0.0        | 0.0    | 0.0    | 0.0    | 0.0     |
| <i>Chebotomium</i>                       | 0.0        | 0.0    | 0.0    | 0.0    | 0.0     | 0.0        | 0.4    | 0.1    | 0.2    | 0.0     | 0.0        | 0.0    | 0.0    | 0.0    | 0.0     | 0.0        | 0.0    | 0.5    | 0.4    | 1.0     | 0.0        | 0.0    | 0.0    | 0.2    | 0.0     |
| <i>Clavipora lusitanica</i>              | 0.0        | 0.0    | 1.5    | 2.3    | 0.0     | 0.0        | 0.0    | 0.0    | 0.0    | 0.0     | 0.0        | 0.0    | 1.4    | 1.3    | 0.0     | 0.0        | 0.0    | 0.0    | 0.0    | 0.0     | 1.1        | 0.0    | 0.0    | 1.1    | 0.0     |
| <i>Naganishia adonisii</i>               | 0.0        | 0.0    | 0.0    | 0.0    | 0.0     | 0.0        | 0.0    | 0.0    | 0.0    | 0.0     | 0.0        | 0.0    | 0.0    | 0.0    | 0.0     | 0.0        | 0.0    | 0.0    | 0.0    | 0.0     | 0.0        | 0.0    | 0.0    | 0.0    | 0.0     |
| <i>Naganishia albidosmitis</i>           | 0.0        |        |        |        |         |            |        |        |        |         |            |        |        |        |         |            |        |        |        |         |            |        |        |        |         |

| Taxa                                          | Subject 23 |        |        |        |         | Subject 24 |        |        |        |         | Subject 25 |        |        |        |         | Subject 26 |        |        |        |         | Subject 27 |        |        |        |         |
|-----------------------------------------------|------------|--------|--------|--------|---------|------------|--------|--------|--------|---------|------------|--------|--------|--------|---------|------------|--------|--------|--------|---------|------------|--------|--------|--------|---------|
|                                               | Baseline   | Week 2 | Week 4 | Week 8 | Week 12 | Baseline   | Week 2 | Week 4 | Week 8 | Week 12 | Baseline   | Week 2 | Week 4 | Week 8 | Week 12 | Baseline   | Week 2 | Week 4 | Week 8 | Week 12 | Baseline   | Week 2 | Week 4 | Week 8 | Week 12 |
| <i>Malassezia restricta</i>                   | 0.1        | 20.5   | 0.2    | 20.9   | 48.9    | 0.1        | 20.2   | 24.9   | 51.9   | 71.9    | 0.3        | 61.9   | 66.8   | 66.8   | 62.3    | 0.2        | 0.2    | 0.5    | 26.9   | 26.9    | 0.1        | 0.1    | 0.1    | 0.1    | 0.1     |
| <i>Malassezia globosa</i>                     | 35.2       | 27.4   | 25.8   | 22.1   | 20.0    | 34.2       | 26.8   | 25.2   | 21.2   | 19.0    | 20.8       | 13.0   | 12.0   | 9.2    | 8.0     | 29.7       | 21.8   | 20.5   | 17.0   | 15.1    | 28.1       | 21.3   | 20.0   | 16.4   | 14.6    |
| <i>Malassezia sympodialis</i>                 | 0.3        | 0.9    | 0.2    | 1.1    | 1.9     | 2.1        | 3.1    | 2.1    | 3.2    | 4.7     | 1.8        | 3.2    | 2.9    | 3.2    | 6.4     | 0.0        | 0.0    | 0.6    | 0.9    | 1.6     | 0.0        | 0.0    | 0.0    | 1.1    | 4.6     |
| <i>Malassezia yeastabonensis</i>              | 0.0        | 0.0    | 0.0    | 0.0    | 0.2     | 0.0        | 0.0    | 0.0    | 0.0    | 0.0     | 0.0        | 0.0    | 0.0    | 0.0    | 0.0     | 0.0        | 0.0    | 0.0    | 0.0    | 0.0     | 0.0        | 0.0    | 0.0    | 0.0    | 0.0     |
| <i>Malassezia dermatis</i>                    | 0.1        | 0.2    | 0.0    | 0.0    | 0.0     | 0.7        | 0.2    | 0.0    | 0.1    | 0.2     | 0.2        | 0.0    | 0.2    | 0.4    | 0.4     | 0.2        | 0.1    | 0.0    | 0.0    | 0.0     | 0.5        | 0.2    | 0.0    | 0.0    | 0.1     |
| <i>Malassezia japonica</i>                    | 0.0        | 0.0    | 0.0    | 0.0    | 0.0     | 0.0        | 0.0    | 0.0    | 0.0    | 0.0     | 0.0        | 0.1    | 0.0    | 0.0    | 0.0     | 0.0        | 0.0    | 0.0    | 0.0    | 0.1     | 0.0        | 0.0    | 0.2    | 0.0    | 1.0     |
| <i>Malassezia obtusa</i>                      | 0.0        | 0.2    | 0.1    | 0.1    | 0.0     | 0.0        | 0.4    | 0.2    | 0.1    | 0.3     | 0.1        | 0.1    | 0.0    | 0.0    | 0.0     | 0.0        | 0.0    | 0.0    | 0.0    | 0.0     | 0.0        | 0.0    | 0.0    | 0.0    | 0.0     |
| <i>Malassezia furfur</i>                      | 0.1        | 0.0    | 0.1    | 0.0    | 0.0     | 0.0        | 0.0    | 0.0    | 0.0    | 0.0     | 0.0        | 0.0    | 0.0    | 0.0    | 0.0     | 0.0        | 0.0    | 0.0    | 0.0    | 0.0     | 0.0        | 0.0    | 0.0    | 0.0    | 0.0     |
| <i>Malassezia sicoffiae</i>                   | 0.0        | 0.1    | 0.0    | 0.0    | 0.1     | 0.2        | 0.0    | 0.2    | 0.0    | 0.1     | 0.0        | 0.0    | 0.1    | 0.0    | 0.0     | 0.0        | 0.0    | 0.3    | 0.3    | 0.3     | 0.0        | 0.0    | 0.3    | 0.4    | 0.0     |
| <i>Aureobasidium</i>                          | 0.0        | 0.7    | 0.9    | 1.2    | 1.1     | 0.0        | 0.0    | 0.0    | 1.3    | 0.0     | 1.3        | 0.2    | 0.0    | 1.2    | 0.9     | 0.6        | 0.3    | 0.9    | 3.0    | 0.4     | 0.3        | 0.1    | 0.0    | 0.0    | 1.1     |
| <i>Rhodotorula mucilaginosa</i>               | 0.2        | 1.4    | 0.8    | 1.4    | 0.9     | 1.3        | 0.0    | 1.1    | 2.3    | 3.2     | 0.5        | 0.4    | 1.7    | 2.2    | 3.6     | 1.9        | 2.2    | 3.2    | 1.9    | 3.2     | 1.4        | 1.9    | 3.5    | 3.2    | 1.9     |
| <i>Aspergillus</i>                            | 0.2        | 3.9    | 0.8    | 0.0    | 2.4     | 0.0        | 2.1    | 0.3    | 2.1    | 1.9     | 0.0        | 1.1    | 1.2    | 1.1    | 0.5     | 0.0        | 1.2    | 1.9    | 1.6    | 1.3     | 0.5        | 0.4    | 1.3    | 1.9    | 2.2     |
| <i>Cladosporium</i>                           | 0.4        | 1.5    | 2.2    | 4.1    | 6.7     | 2.1        | 3.2    | 2.9    | 3.1    | 5.0     | 0.2        | 2.1    | 3.2    | 3.8    | 4.6     | 3.2        | 4.2    | 5.1    | 3.9    | 5.1     | 0.0        | 2.4    | 0.2    | 5.3    | 0.0     |
| <i>Torula hederiformis</i>                    | 0.0        | 0.0    | 0.0    | 0.1    | 0.0     | 0.0        | 0.0    | 0.0    | 0.0    | 0.2     | 0.0        | 0.0    | 0.0    | 0.1    | 0.0     | 0.0        | 0.0    | 0.0    | 0.0    | 0.0     | 0.0        | 0.0    | 0.1    | 0.0    | 0.0     |
| <i>Naganishia fredmannii</i>                  | 0.0        | 0.2    | 0.3    | 0.1    | 0.3     | 0.2        | 0.0    | 0.2    | 0.0    | 0.1     | 0.0        | 0.2    | 0.0    | 0.0    | 0.0     | 0.2        | 0.5    | 0.8    | 0.8    | 0.8     | 0.1        | 0.3    | 0.4    | 0.1    | 0.3     |
| <i>Candida albicans</i>                       | 0.2        | 0.3    | 0.5    | 0.0    | 0.0     | 0.0        | 0.0    | 0.2    | 0.0    | 0.0     | 0.3        | 0.7    | 0.2    | 0.0    | 0.0     | 0.5        | 0.3    | 0.1    | 0.0    | 0.1     | 1.3        | 0.8    | 0.3    | 0.2    | 0.0     |
| <i>Candida parapsilosis</i>                   | 1.5        | 2.6    | 4.8    | 5.1    | 5.7     | 3.2        | 2.9    | 6.1    | 5.5    | 4.3     | 1.4        | 3.7    | 5.6    | 6.3    | 6.9     | 1.3        | 2.8    | 3.6    | 4.3    | 3.8     | 3.8        | 2.9    | 4.3    | 5.4    | 3.9     |
| <i>Alternaria</i>                             | 0.0        | 0.0    | 1.1    | 0.0    | 0.4     | 0.0        | 0.0    | 0.0    | 0.0    | 0.0     | 0.0        | 1.3    | 0.0    | 0.2    | 0.1     | 0.0        | 0.2    | 0.0    | 0.0    | 0.0     | 0.0        | 1.1    | 0.0    | 0.0    | 0.0     |
| <i>Cyrtobasidium stoffiae</i>                 | 0.0        | 0.0    | 0.2    | 1.3    | 0.7     | 0.0        | 0.0    | 0.3    | 0.0    | 1.3     | 0.0        | 0.0    | 0.0    | 0.0    | 0.2     | 0.1        | 0.0    | 0.2    | 0.3    | 0.2     | 0.0        | 0.0    | 0.0    | 0.1    | 0.0     |
| <i>Pichia membranifaciens</i>                 | 0.0        | 0.0    | 0.3    | 0.0    | 0.2     | 0.1        | 0.2    | 0.1    | 0.2    | 0.4     | 0.2        | 0.0    | 0.0    | 0.0    | 0.1     | 0.0        | 0.0    | 0.1    | 0.0    | 0.1     | 0.2        | 0.3    | 0.1    | 0.1    | 0.2     |
| <i>Symphyoteryces</i>                         | 0.0        | 0.2    | 0.0    | 0.0    | 0.0     | 0.0        | 0.0    | 0.0    | 0.0    | 0.0     | 0.0        | 0.2    | 0.0    | 0.0    | 0.0     | 0.0        | 0.3    | 0.0    | 0.0    | 0.0     | 0.0        | 0.2    | 0.0    | 0.2    | 0.0     |
| <i>[Candida] glabrata</i>                     | 0.0        | 0.0    | 0.0    | 0.0    | 0.0     | 0.0        | 0.0    | 0.0    | 0.0    | 0.0     | 0.0        | 0.0    | 0.2    | 0.2    | 0.0     | 0.0        | 0.0    | 0.0    | 0.0    | 0.0     | 0.0        | 0.0    | 0.0    | 0.0    | 0.2     |
| <i>Filobasidium floriforme</i>                | 0.0        | 0.0    | 0.2    | 0.0    | 0.3     | 0.0        | 0.0    | 0.0    | 0.0    | 0.2     | 0.0        | 0.2    | 0.0    | 0.1    | 0.1     | 0.0        | 0.0    | 0.2    | 0.4    | 0.2     | 0.4        | 0.0    | 0.0    | 0.0    | 0.1     |
| <i>Erythrobasidium hasagawianum</i>           | 0.0        | 0.0    | 0.0    | 0.0    | 0.0     | 0.0        | 0.0    | 0.0    | 0.0    | 0.0     | 0.0        | 0.0    | 0.0    | 0.0    | 0.0     | 0.0        | 0.0    | 0.0    | 0.0    | 0.0     | 0.0        | 0.0    | 0.0    | 0.0    | 0.0     |
| <i>Kuflia</i>                                 | 0.0        | 0.0    | 0.0    | 0.0    | 0.1     | 0.0        | 0.0    | 0.0    | 0.0    | 0.0     | 0.0        | 0.0    | 0.0    | 0.1    | 0.1     | 0.0        | 0.0    | 0.4    | 0.1    | 0.4     | 0.0        | 0.0    | 0.0    | 0.2    | 0.1     |
| <i>Vitrioscoccia carneasens</i>               | 0.0        | 0.0    | 0.2    | 0.2    | 0.0     | 0.0        | 0.0    | 0.0    | 0.0    | 0.0     | 0.0        | 0.2    | 0.0    | 0.0    | 0.0     | 0.0        | 0.0    | 0.0    | 0.0    | 0.0     | 0.0        | 0.3    | 0.0    | 0.1    | 0.0     |
| <i>Cyrtobasidium minutum</i>                  | 0.0        | 0.0    | 0.0    | 0.2    | 0.0     | 0.0        | 0.0    | 0.0    | 0.0    | 0.0     | 0.0        | 0.0    | 0.0    | 0.0    | 0.2     | 0.0        | 0.0    | 0.0    | 0.0    | 0.0     | 0.0        | 0.0    | 0.0    | 0.0    | 0.2     |
| <i>[Candida] zeylanoides</i>                  | 0.0        | 0.0    | 0.0    | 0.2    | 0.1     | 0.0        | 0.2    | 0.0    | 0.2    | 0.4     | 0.0        | 0.0    | 0.0    | 0.0    | 0.1     | 0.0        | 0.0    | 0.2    | 0.2    | 0.2     | 0.0        | 0.0    | 0.3    | 0.0    | 0.2     |
| <i>Fusarium</i>                               | 0.0        | 0.0    | 3.2    | 0.0    | 0.0     | 0.0        | 0.0    | 0.0    | 0.0    | 0.0     | 0.0        | 2.3    | 1.2    | 1.1    | 1.4     | 0.1        | 1.1    | 3.9    | 5.2    | 3.9     | 1.5        | 1.4    | 0.0    | 0.3    | 0.0     |
| <i>Debaromyces hanseii/fabryi/vindictivae</i> | 0.0        | 0.0    | 1.9    | 0.0    | 0.0     | 2.3        | 1.9    | 2.3    | 1.9    | 2.3     | 0.0        | 2.1    | 4.2    | 0.0    | 0.0     | 0.1        | 2.2    | 0.0    | 1.4    | 0.0     | 0.0        | 0.0    | 0.0    | 0.0    | 0.0     |
| <i>Villosclavia</i>                           | 0.0        | 0.0    | 0.0    | 0.1    | 0.0     | 0.0        | 0.0    | 0.0    | 0.0    | 0.0     | 0.0        | 0.0    | 0.0    | 0.0    | 0.0     | 0.2        | 0.0    | 0.0    | 0.0    | 0.0     | 0.0        | 0.0    | 0.1    | 0.0    | 0.3     |
| <i>Trichosporon coremiforme</i>               | 0.0        | 0.1    | 0.2    | 0.1    | 0.0     | 0.0        | 0.1    | 0.0    | 0.0    | 0.0     | 0.0        | 0.0    | 0.0    | 0.0    | 0.0     | 0.0        | 0.0    | 0.0    | 0.0    | 0.0     | 0.0        | 0.0    | 0.0    | 0.0    | 0.0     |
| <i>Salizyma favae</i>                         | 0.0        | 0.0    | 0.0    | 0.0    | 0.0     | 0.0        | 0.0    | 0.0    | 0.0    | 0.1     | 0.0        | 0.0    | 0.0    | 0.1    | 0.0     | 0.0        | 0.0    | 0.0    | 0.0    | 0.0     | 0.0        | 0.3    | 0.0    | 0.0    | 0.3     |
| <i>Cyrtobasidium capitatum</i>                | 0.0        | 0.0    | 0.0    | 0.2    | 0.3     | 0.0        | 0.2    | 0.2    | 0.1    | 0.3     | 0.0        | 0.0    | 0.1    | 0.2    | 0.0     | 0.0        | 0.3    | 0.2    | 0.1    | 0.2     | 0.0        | 0.0    | 0.3    | 0.0    | 0.0     |
| <i>Sarcodon</i>                               | 0.0        | 0.0    | 0.0    | 0.0    | 0.0     | 0.0        | 0.0    | 0.0    | 0.0    | 0.0     | 0.0        | 0.0    | 0.0    | 0.0    | 0.0     | 0.0        | 0.0    | 0.0    | 0.0    | 0.0     | 0.0        | 0.0    | 0.0    | 0.0    | 0.0     |
| <i>Penicillium</i>                            | 0.0        | 3.0    | 4.7    | 3.2    | 1.9     | 0.0        | 0.0    | 0.4    | 2.3    | 1.2     | 0.0        | 0.9    | 0.0    | 0.0    | 1.4     | 0.0        | 0.4    | 0.3    | 1.1    | 0.3     | 0.0        | 0.0    | 0.0    | 0.0    | 0.0     |
| <i>Vernicia</i>                               | 0.0        | 0.0    | 0.0    | 0.0    | 0.0     | 0.0        | 0.0    | 0.0    | 0.0    | 0.0     | 0.0        | 0.0    | 0.0    | 0.1    | 0.0     | 0.0        | 0.0    | 0.0    | 0.0    | 0.1     | 0.0        | 0.3    | 0.0    | 0.0    | 0.2     |
| <i>Saccharomyces cerevisiae</i>               | 0.0        | 0.0    | 0.0    | 0.0    | 0.0     | 0.0        | 0.0    | 0.0    | 0.0    | 0.0     | 0.0        | 0.0    | 0.0    | 0.0    | 0.0     | 0.0        | 0.0    | 0.0    | 0.0    | 0.0     | 0.0        | 0.1    | 0.0    | 0.0    | 0.0     |
| <i>Stigmatomyces halophilus</i>               | 0.0        | 0.0    | 0.0    | 0.1    | 0.0     | 0.0        | 0.1    | 0.2    | 0.2    | 0.1     | 0.0        | 0.0    | 0.0    | 0.2    | 0.0     | 0.0        | 0.1    | 0.0    | 0.0    | 0.0     | 0.0        | 0.0    | 0.4    | 1.2    | 0.0     |
| <i>Micromonospora</i>                         | 0.0        | 0.0    | 0.1    | 0.0    | 0.0     | 0.0        | 0.0    | 0.0    | 0.0    | 0.0     | 0.0        | 0.1    | 0.0    | 0.0    | 0.0     | 0.0        | 0.0    | 0.0    | 0.0    | 0.0     | 0.0        | 0.2    | 0.0    | 0.0    | 0.0     |
| <i>Walleria</i>                               | 0.0        | 1.8    | 0.0    | 0.0    | 2.8     | 0.0        | 0.0    | 0.0    | 0.0    | 0.0     | 0.0        | 0.0    | 0.1    | 0.0    | 0.0     | 0.0        | 0.0    | 0.0    | 0.3    | 0.1     | 0.0        | 0.0    | 0.0    | 0.0    | 0.0     |
| <i>Papillotrema flavescens</i>                | 0.0        | 0.0    | 0.0    | 0.0    | 0.0     | 0.0        | 0.0    | 0.0    | 0.0    | 0.0     | 0.0        | 1.7    | 0.0    | 0.1    | 0.0     | 0.0        | 0.0    | 0.0    | 0.2    | 0.0     | 0.0        | 0.8    | 0.3    | 0.0    | 0.0     |
| <i>Filobasidium unguiculatum</i>              | 0.0        | 0.0    | 0.4    | 0.2    | 0.4     | 0.0        | 0.2    | 0.3    | 0.2    | 0.1     | 0.0        | 0.2    | 0.3    | 0.2    | 0.1     | 0.0        | 0.0    | 0.0    | 0.2    | 0.2     | 0.0        | 0.0    | 0.0    | 0.0    | 0.0     |
| <i>Taphrina</i>                               | 0.0        | 0.0    | 0.0    | 0.0    | 0.0     | 0.0        | 0.0    | 0.0    | 0.0    | 0.0     | 0.0        | 0.0    | 0.0    | 0.0    | 0.0     | 0.0        | 0.0    | 0.0    | 0.0    | 0.0     | 0.0        | 0.0    | 0.0    | 0.0    | 0.1     |
| <i>Acronium</i>                               | 0.0        | 0.0    | 0.0    | 0.0    | 0.0     | 0.0        | 0.0    | 0.0    | 0.0    | 0.0     | 0.0        | 0.0    | 0.0    | 0.0    | 1.1     | 0.0        | 0.0    | 0.0    | 0.0    | 0.0     | 0.0        | 0.0    | 0.0    | 0.0    | 1.1     |
| <i>Filobasidium magnum</i>                    | 0.0        | 0.0    | 0.0    | 0.0    | 0.2     | 0.0        | 0.3    | 0.2    | 0.1    | 0.3     | 0.0        | 0.0    | 0.0    | 0.0    | 0.0     | 0.0        | 0.0    | 0.0    | 0.4    | 0.2     | 0.0        | 0.0    | 0.0    | 0.0    | 0.2     |
| <i>Vitrioscoccia victoriae</i>                | 0.0        | 0.0    | 0.0    | 0.0    | 0.0     | 0.0        | 0.0    | 0.0    | 0.0    | 0.0     | 0.0        | 0.0    | 0.0    | 0.0    | 0.2     | 0.0        | 0.0    | 0.0    | 0.0    | 0.0     | 0.0        | 0.1    | 0.4    | 0.0    | 0.0     |
| <i>Elvicocon</i>                              | 0.0        | 0.3    | 0.0    | 0.1    | 0.3     | 0.0        | 0.0    | 0.0    | 0.0    | 0.0     | 0.0        | 1.1    | 0.3    | 0.0    | 0.0     | 0.0        | 0.0    | 0.0    | 0.0    | 0.0     | 0.0        | 0.0    | 0.0    | 0.0    | 1.2     |
| <i>Cernaea</i>                                | 0.0        | 0.0    | 0.0    | 0.0    | 0.0     | 0.0        | 0.0    | 0.0    | 0.0    | 0.0     | 0.0        | 0.0    | 0.0    | 0.0    | 0.0     | 0.0        | 0.0    | 0.0    | 0.0    | 0.0     | 0.0        | 0.0    | 0.0    | 0.0    | 0.0     |
| <i>Trichosporon faveale</i>                   | 0.0        | 0.0    | 0.0    | 0.0    | 0.0     | 0.0        | 0.0    | 0.0    | 0.0    | 0.0     | 0.0        | 0.0    | 0.0    | 0.0    | 0.0     | 0.0        | 0.0    | 0.0    | 0.0    | 0.0     | 0.0        | 0.0    | 0.0    | 0.0    | 0.0     |
| <i>[Candida] sak</i>                          | 0.0        | 0.0    | 0.0    | 0.0    | 0.0     | 0.0        | 0.0    | 0.0    | 0.0    | 0.0     | 0.0        | 0.0    | 0.0    | 0.0    | 0.0     | 0.0        | 0.0    | 0.0    | 0.0    | 0.0     | 0.0        | 0.0    | 0.0    | 0.0    | 0.0     |
| <i>Chesterium</i>                             | 0.0        | 0.0    | 0.0    | 0.0    | 0.1     | 0.0        | 0.1    | 0.1    | 0.3    | 0.3     | 0.0        | 0.0    | 0.0    | 0.0    | 0.1     | 0.0        | 0.0    | 0.0    | 0.1    | 0.1     | 0.0        | 0.0    | 0.0    | 0.0    | 0.0     |
| <i>Clavipora kastanien</i>                    | 0.0        | 0.0    | 0.0    | 1.2    | 0.0     | 0.0        | 0.0    | 0.0    | 0.0    | 0.0     | 0.0        | 0.0    | 0.0    | 0.0    | 0.0     | 0.0        | 0.2    | 0.0    | 0.0    | 0.0     | 0.0        | 0.0    | 1.3    | 1.7    | 0.0     |
| <i>Naganishia adriensis</i>                   | 0.0        | 0.0    | 1.2    | 0.0    | 0.0     | 0.0        | 0.0    | 0.0    | 0.0    | 0.0     | 0.0        | 0.0    | 0.0    | 0.0    | 0.0     | 0.0        | 0.2    | 0.0    | 0.0    | 0.0     | 0.0        | 0.0    | 0.0    | 0.0    | 0.0     |
| <i>Naganishia albidomilis</i>                 | 0.0        | 0.0</  |        |        |         |            |        |        |        |         |            |        |        |        |         |            |        |        |        |         |            |        |        |        |         |

| Taxa                              | Healthy control |            |            |            |            |            |            |            |            |            |
|-----------------------------------|-----------------|------------|------------|------------|------------|------------|------------|------------|------------|------------|
|                                   | Subject 01      | Subject 02 | Subject 03 | Subject 04 | Subject 05 | Subject 06 | Subject 07 | Subject 08 | Subject 09 | Subject 10 |
| Melassezia restricta              | 44.0            | 43.2       | 42.8       | 45.0       | 49.0       | 55.4       | 32.9       | 43.0       | 51.0       | 48.0       |
| Melassezia globosa                | 24.0            | 21.0       | 26.3       | 29.0       | 16.9       | 26.0       | 25.0       | 24.0       | 28.0       | 20.0       |
| Melassezia sympodialis            | 10.4            | 4.9        | 3.7        | 3.8        | 4.3        | 2.1        | 3.2        | 6.3        | 5.2        | 4.2        |
| Melassezia yamatoensis            | 1.2             | 0.0        | 0.0        | 0.0        | 0.0        | 0.0        | 0.0        | 0.0        | 0.0        | 0.2        |
| Melassezia dermatis               | 0.3             | 1.1        | 3.2        | 0.0        | 1.5        | 0.1        | 2.1        | 2.0        | 1.3        | 0.0        |
| Melassezia japonica               | 0.0             | 0.1        | 0.3        | 0.0        | 0.0        | 1.0        | 0.1        | 0.0        | 0.0        | 1.1        |
| Melassezia clobata                | 1.6             | 0.0        | 0.2        | 0.2        | 0.2        | 0.0        | 0.0        | 0.0        | 0.3        | 0.0        |
| Melassezia furfur                 | 0.5             | 0.0        | 0.0        | 1.2        | 0.1        | 0.0        | 0.0        | 0.0        | 0.0        | 0.0        |
| Melassezia slooffiae              | 0.0             | 0.1        | 0.3        | 0.1        | 0.0        | 0.1        | 0.3        | 0.0        | 0.1        | 0.1        |
| Aureobasidium                     | 0.0             | 0.2        | 0.2        | 0.1        | 0.3        | 0.2        | 0.4        | 1.2        | 1.1        | 1.1        |
| Rhodotorula mucilaginosa          | 0.4             | 4.6        | 1.8        | 2.2        | 0.1        | 1.1        | 1.1        | 4.3        | 1.0        | 0.2        |
| Aspergillus                       | 0.1             | 5.6        | 2.2        | 0.9        | 3.1        | 1.4        | 0.1        | 0.2        | 0.2        | 1.4        |
| Cladosporium                      | 1.8             | 1.3        | 1.9        | 3.1        | 6.3        | 1.1        | 2.1        | 3.5        | 4.3        | 9.2        |
| Toninia herbarum                  | 0.0             | 0.1        | 0.1        | 0.1        | 0.2        | 0.2        | 0.1        | 0.1        | 0.1        | 0.1        |
| Naganishia friedmannii            | 0.2             | 0.2        | 0.1        | 0.0        | 0.1        | 0.1        | 0.2        | 0.2        | 0.1        | 0.3        |
| Candida albicans                  | 0.0             | 0.0        | 0.1        | 0.0        | 0.0        | 0.0        | 0.0        | 0.1        | 0.0        | 0.1        |
| Candida parapsilosis              | 6.0             | 4.6        | 3.0        | 6.4        | 5.5        | 1.2        | 4.5        | 4.3        | 1.1        | 2.1        |
| Alternaria                        | 0.1             | 0.0        | 0.8        | 0.1        | 0.1        | 0.2        | 0.1        | 0.1        | 0.2        | 0.1        |
| Cyrtobasidium slooffiae           | 0.2             | 0.2        | 0.0        | 0.0        | 0.1        | 0.0        | 0.2        | 0.1        | 0.2        | 0.1        |
| Pichia membranifaciens            | 0.2             | 0.1        | 0.2        | 0.0        | 0.1        | 3.0        | 0.1        | 0.1        | 0.4        | 0.2        |
| Symptiodiomyces                   | 0.1             | 0.1        | 0.1        | 0.2        | 0.0        | 0.1        | 0.0        | 0.0        | 0.1        | 0.1        |
| [Candida] glabrata                | 0.2             | 0.0        | 0.4        | 0.0        | 0.0        | 0.0        | 0.1        | 0.3        | 0.0        | 0.0        |
| Filobasidium floriforme           | 0.3             | 0.2        | 0.2        | 0.1        | 0.0        | 0.1        | 0.2        | 0.1        | 0.2        | 0.1        |
| Erythrobasidium hasegawianum      | 0.0             | 0.0        | 0.0        | 0.0        | 0.0        | 0.0        | 0.1        | 0.0        | 0.0        | 0.1        |
| Knufia                            | 0.2             | 0.2        | 0.3        | 0.1        | 0.2        | 0.1        | 0.1        | 0.1        | 0.0        | 0.1        |
| Vishniacozyma carnescent          | 0.1             | 0.2        | 0.0        | 0.1        | 0.1        | 0.0        | 0.1        | 0.3        | 0.1        | 0.1        |
| Cyrtobasidium minus               | 0.0             | 0.3        | 0.1        | 0.2        | 0.1        | 0.2        | 0.0        | 0.2        | 0.0        | 0.0        |
| [Candida] zeylanoides             | 0.1             | 0.3        | 0.1        | 0.1        | 0.4        | 0.0        | 0.2        | 0.0        | 0.2        | 0.1        |
| Fusarium                          | 0.2             | 1.1        | 1.3        | 0.2        | 0.8        | 0.0        | 1.2        | 0.2        | 0.1        | 2.2        |
| Debaryomyces hansenii/fabryi/Wind | 1.8             | 2.2        | 2.4        | 2.1        | 2.9        | 1.2        | 0.1        | 0.2        | 1.2        | 1.2        |
| Villosiella                       | 0.1             | 0.1        | 0.1        | 0.2        | 0.0        | 0.1        | 0.0        | 0.2        | 0.0        | 0.1        |
| Trichosporon coremiforme          | 0.1             | 0.1        | 0.1        | 0.1        | 0.2        | 0.1        | 0.2        | 0.0        | 0.0        | 0.2        |
| Saltzyzyma flava                  | 0.0             | 0.1        | 0.1        | 0.1        | 0.1        | 0.1        | 0.0        | 1.2        | 0.1        | 0.1        |
| Cyrtobasidium capitatum           | 0.2             | 0.0        | 0.1        | 0.2        | 0.2        | 0.0        | 0.2        | 0.0        | 0.1        | 0.3        |
| Sarcodinium                       | 0.2             | 0.1        | 0.1        | 0.2        | 0.0        | 0.0        | 0.0        | 0.0        | 0.0        | 0.0        |
| Penicillium                       | 1.1             | 0.0        | 3.2        | 0.3        | 1.7        | 0.3        | 0.3        | 0.1        | 1.2        | 0.2        |
| Vermutaria                        | 0.0             | 0.2        | 0.1        | 0.2        | 2.1        | 0.2        | 0.1        | 1.3        | 0.0        | 0.1        |
| Saccharomyces cerevisiae          | 0.0             | 0.0        | 0.0        | 0.1        | 0.0        | 0.1        | 0.0        | 0.1        | 0.0        | 0.0        |
| Stenigmatomyces halophilus        | 0.1             | 0.3        | 0.3        | 0.1        | 0.0        | 0.2        | 0.0        | 0.0        | 0.1        | 0.0        |
| Micromonospora                    | 0.0             | 0.2        | 0.0        | 0.3        | 0.2        | 0.2        | 0.0        | 0.2        | 0.1        | 0.5        |
| Wallmania                         | 0.2             | 0.1        | 0.3        | 0.0        | 0.2        | 0.2        | 0.0        | 0.1        | 0.0        | 0.2        |
| Papillotrema flavescens           | 0.0             | 0.3        | 0.2        | 0.2        | 0.0        | 0.0        | 0.1        | 0.1        | 0.0        | 0.0        |
| Filobasidium unguiculatum         | 0.1             | 0.0        | 0.2        | 0.2        | 0.3        | 0.0        | 0.2        | 0.0        | 0.1        | 0.4        |
| Tagitina                          | 0.0             | 0.1        | 0.2        | 0.0        | 0.1        | 0.1        | 0.0        | 0.1        | 0.0        | 0.2        |
| Acromonium                        | 0.2             | 0.0        | 0.0        | 0.1        | 0.1        | 0.8        | 0.2        | 0.0        | 0.3        | 0.0        |
| Filobasidium magnum               | 0.2             | 2.1        | 0.4        | 0.0        | 0.2        | 0.2        | 0.2        | 0.0        | 0.0        | 1.1        |
| Vishniacozyma victoriae           | 0.0             | 0.0        | 0.0        | 0.1        | 0.0        | 0.1        | 0.1        | 0.1        | 0.0        | 0.0        |
| Epicoecium                        | 1.1             | 0.3        | 0.0        | 0.2        | 0.2        | 0.2        | 0.9        | 0.2        | 0.1        | 0.3        |
| Camea                             | 0.2             | 1.3        | 0.0        | 0.1        | 0.1        | 0.8        | 0.1        | 0.1        | 0.0        | 0.0        |
| Trichosporon faecale              | 0.0             | 0.0        | 0.1        | 0.1        | 0.2        | 0.1        | 0.2        | 0.1        | 0.0        | 0.0        |
| Trichomenium                      | 0.0             | 0.1        | 0.0        | 0.0        | 0.0        | 0.0        | 0.0        | 0.0        | 0.4        | 0.1        |
| Papillotrema aurea                | 0.1             | 0.0        | 0.0        | 0.4        | 0.3        | 0.2        | 0.2        | 0.0        | 0.1        | 0.1        |
| [Candida] sak                     | 0.0             | 0.2        | 0.0        | 0.0        | 0.0        | 0.3        | 0.0        | 0.2        | 0.0        | 0.1        |
| Chaetomium                        | 0.1             | 0.1        | 0.2        | 0.2        | 0.1        | 0.0        | 0.0        | 0.1        | 0.3        | 0.1        |
| Chrysosporium isolanense          | 0.0             | 0.0        | 0.0        | 0.2        | 0.0        | 0.0        | 0.1        | 1.1        | 0.0        | 0.0        |
| Naganishia adeliensis             | 0.3             | 0.2        | 0.2        | 0.1        | 0.2        | 0.1        | 0.2        | 0.0        | 0.0        | 1.0        |
| Naganishia albidosimilis          | 0.2             | 0.1        | 0.2        | 0.1        | 0.2        | 0.0        | 0.2        | 0.1        | 0.1        | 0.2        |
| Naganishia alvida                 | 0.1             | 0.2        | 0.0        | 0.1        | 0.3        | 0.0        | 0.3        | 0.1        | 0.1        | 0.2        |
| Naganishia diffuens               | 0.1             | 1.1        | 0.0        | 0.1        | 0.1        | 0.1        | 1.2        | 0.1        | 0.1        | 0.1        |
| Naganishia globosa                | 0.1             | 0.1        | 0.3        | 0.2        | 0.0        | 0.3        | 0.0        | 2.3        | 0.0        | 1.6        |
| Meyerozyma guilliermondii         | 1.1             | 0.3        | 0.3        | 0.0        | 0.2        | 0.1        | 0.1        | 1.1        | 0.1        | 0.1        |
| Phoma                             | 0.1             | 0.3        | 0.2        | 0.3        | 0.1        | 0.1        | 0.2        | 0.0        | 0.2        | 0.1        |
| Trichosporon asahi                | 0.0             | 0.0        | 0.0        | 0.0        | 0.2        | 0.1        | 0.0        | 0.1        | 0.0        | 0.0        |
| Trichosporon virens               | 0.0             | 0.1        | 0.0        | 0.0        | 0.0        | 0.0        | 0.1        | 0.0        | 0.0        | 0.0        |
| Yarrowia lipolytica               | 0.0             | 0.0        | 0.1        | 0.0        | 0.0        | 0.0        | 0.0        | 0.0        | 0.0        | 0.0        |
| Gyrodontium                       | 0.0             | 0.0        | 0.0        | 0.2        | 0.0        | 0.0        | 0.0        | 0.0        | 0.1        | 0.1        |
